# Supplementary material for: Contributions of body mass index and exercise habits on inflammatory markers: a cohort study of middle-aged adults living in the USA
Source: PubMed Central journal article supplement — BMJ Open. 2013 May 17;3(5):e002623. doi: 10.1136/bmjopen-2013-002623 (PMC3657650; doi:10.1136/bmjopen-2013-002623), 2013-05-17
Supplement: bmjopen-2013-002623.draft_revisions.pdf [file bmjopen-2013-002623.draft_revisions.pdf]

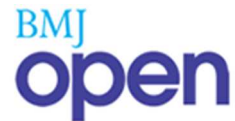

**Contributions of Body Mass Index and Exercise Habits on  
Inflammatory Markers: A Cohort Study of Middle Aged  
Adults Living in the United States**

|                                    |                                                                                   |
|------------------------------------|-----------------------------------------------------------------------------------|
| Journal:                           | <i>BMJ Open</i>                                                                   |
| Manuscript ID:                     | bmjopen-2013-002623                                                               |
| Article Type:                      | Research                                                                          |
| Date Submitted by the Author:      | 21-Jan-2013                                                                       |
| Complete List of Authors:          | Strohacker, Kelley<br>McCaffery, Jeanne<br>wing, rena                             |
| <b>Primary Subject<br>Heading</b>: | Epidemiology                                                                      |
| Secondary Subject Heading:         | Immunology (including allergy)                                                    |
| Keywords:                          | Immunology < BASIC SCIENCES, EPIDEMIOLOGY, Public health <<br>INFECTIOUS DISEASES |
|                                    |                                                                                   |

SCHOLARONE™  
Manuscripts

**Contributions of Body Mass Index and Exercise Habits on Inflammatory Markers: A Cohort Study of Middle Aged Adults Living in the United States**

Kelley Strohacker, Ph.D.<sup>a</sup>, Rena R. Wing, Ph.D.<sup>a</sup>, and Jeanne M. McCaffery, Ph.D.<sup>a</sup>

<sup>a</sup>The Miriam Hospital and the Warren Alpert Medical School of Brown University, Providence RI

Corresponding Author

Jeanne M. McCaffery, Ph.D.

Associate Professor of Psychiatry and Human Behavior (Research)

The Miriam Hospital Weight Control and Diabetes Research Center

196 Richmond Street

Providence, RI 02904

Phone: (401) 793-8010

Fax: (401) 793-8944

Email: JMccaffery@lifespan.org

Running Title:

BMI, Physical Activity and Inflammation

**Key Words:** MIDUS, Intracellular Adhesion Molecule-1, Fibrinogen, C-Reactive Protein

**Word Count: 3199**

## ARTICLE SUMMARY

### Article focus

- Systemic inflammation is related to the progression of cardiovascular disease.
- Independent of obesity, physical activity is inversely related to concentrations of well-established inflammatory biomarkers, such as C-reactive protein (CRP) or interleukin-6 (IL-6).
- This article evaluates interactive effects of body mass index and physical activity on established inflammatory markers, CRP, IL-6, and emerging inflammatory markers, fibrinogen, soluble intracellular adhesion molecule (sICAM)-1, soluble E-selectin, and IL-6 soluble receptor.

### Key messages

- Interactive effects of body mass index and physical activity were observed for CRP, such that regular physical activity reported by overweight individuals was related to significantly lower CRP levels compared to those reported no regular activity.
- Independent of BMI, regular physical activity was related to lower IL-6, with a trend for lower fibrinogen
- Physical activity had no independent effect on circulating markers related to endothelial inflammation, such as sICAM-1 or sE-selectin.

### Strengths and limitations

- 1255 adults from the National Survey of Midlife Development in the United States (MIDUS) Biomarkers Study were analyzed. Statistical analyses were adjusted for age, sex, smoking, and relevant medication use. A strength of this paper is categorizing physical activity levels based on national recommendations. This data may be used to determine appropriate levels of physical activity necessary for reducing inflammation in overweight and obese adults. However, cross-sectional data is limited, as causal inferences cannot be obtained. A second limitation is that the sample was predominantly comprised of non-Hispanic white individuals, therefore findings may not extend to all ethnicities.

54 **ABSTRACT**

55 **Objectives.** Determine whether body mass index (BMI) and physical activity (PA) above, at or  
56 below MET-minute per week (MMW) levels recommended in the 2008 Physical Activity  
57 Guidelines interact or have additive effects on interleukin (IL)-6, C-reactive protein (CRP),  
58 fibrinogen, IL-6 soluble receptor (sr), soluble (s) E-selectin and soluble intracellular adhesion  
59 molecule (sICAM)-1. **Design.** Archived cohort data (N=1255, age 54.5±11.7y, BMI  
60 29.8±6.6kg/m<sup>2</sup>) from the National Survey of Midlife Development in the United States (MIDUS)  
61 Biomarkers Study were analyzed for concentrations of inflammatory markers using general  
62 linear models. MMW was defined as no regular exercise, <500 MMW, 500-1000 MMW, >1000  
63 MMW and BMI was defined as <25, 25-29.9, ≥30 kg/m<sup>2</sup>. Analyses were adjusted for age, sex,  
64 smoking and relevant medication use. **Setting.** Respondents reported to three centers to  
65 complete questionnaires and provide blood samples. **Participants.** Participants were eligible if  
66 they were currently enrolled in the parent MIDUS study (N=1255, 57% female, 93% non-  
67 hispanic white, average age 54.5y). **Primary Outcome Measures.** Concentration of IL-6, CRP,  
68 fibrinogen, IL-6sr, sE-selectin and sICAM. **Results.** Significant interactions were found  
69 between BMI and MMW for CRP and sICAM-1 (P's<0.05). CRP in overweight individuals was  
70 similar to obese when no PA was reported, but was similar to normal weight when any level of  
71 regular PA was reported. sICAM-1 was differentially lower in obese individuals who reported  
72 >1000 MMW compared to obese individuals reporting less exercise. **Conclusion.** Levels of  
73 CRP and sICAM-1 depended on exercise and BMI levels, suggesting that regular exercise may  
74 buffer weight-associated elevations in CRP in overweight individuals while higher levels of  
75 exercise may be necessary to reduce sICAM-1 or CRP in obese individuals. **Trial Registry.**  
76 N/A.

## 77 INTRODUCTION

78 Obesity paired with low physical activity is well known to increase morbidity and mortality  
79 related to cardiovascular disease (CVD)(1). It is less clear, however, whether the benefits of  
80 higher levels of physical activity differ among normal weight, overweight, and obese individuals.

81 Chronic, low-grade inflammation, marked by elevations in cytokines, acute phase  
82 reactants and soluble adhesion molecules, is a developing CVD risk factor(2, 3). Interleukin-6  
83 (IL-6) and, C-reactive protein (CRP) are both considered established inflammatory markers  
84 related to CVD(3). Fibrinogen, soluble intracellular adhesion molecule (sICAM-1) and soluble  
85 e-selectin (sE-selectin) also have key roles in the progression of CVD and have been associated  
86 with elevated risk(4-6). Obesity is strongly associated with greater concentrations of  
87 inflammatory markers(7, 8), while physical activity appears to have anti-inflammatory effects(9,  
88 10). It is unclear whether the effects of physical activity depend on the degree of obesity

89 The purpose of our study was to disentangle the relative contributions of BMI and  
90 physical activity recorded in MET-minutes per week (MMW) to circulating levels of IL-6, IL-6sr,  
91 CRP, sICAM-1 and sE-selectin in middle-aged adults. MMW categories for this study were  
92 determined using values put forth by the Physical Activity Guidelines for Americans, which  
93 states that total weekly physical activity in the range of 500-1000 MET-minutes (approximately  
94 equivalent to 150-300 minutes of moderate or 75-150 minutes of vigorous activity per week)  
95 produces substantial health benefits for adults(11). We hypothesized that BMI and MMW at or  
96 above the 500-1000 MMW guidelines would interact, such that the impact of MMW on  
97 inflammatory markers would differ by degrees of overweight or obesity.

## 99 MATERIALS AND METHODS

1  
2  
3 100           **Design and Sample.** This study was a cross-sectional analysis of archived data (BMI,  
4  
5  
6 101 self-reported physical activity and inflammatory biomarker concentrations) from 1255  
7  
8 102 respondents aged 25 to 74 who provided consent (as approved by The University of Wisconsin  
9  
10 103 Madison Health Sciences Institutional Review Board) and were subsequently enrolled in the  
11  
12 104 National Survey of Midlife Development in the United States (MIDUS) Biomarkers Study(12).  
13  
14  
15 105 The purpose of the Biomarker Project was to add comprehensive biological assessments on a  
16  
17 106 subsample of the parent MIDUS study to further understand age-related differences in physical  
18  
19 107 and mental health. Those who agreed to participate stayed overnight at one of three General  
20  
21 108 Clinical Research Centers: University of California Los Angeles, University of Wisconsin-  
22  
23 109 Madison and Georgetown University. Upon arrival, each respondent provided a detailed medical  
24  
25 110 history (including physical activity levels) and provided all prescription, over-the-counter, and  
26  
27 111 alternative medications to be inventoried by project staff. Following an overnight stay, morning  
28  
29 112 fasting blood samples were obtained. Cohorts were assessed between July 2004 and May 2009  
30  
31 113 as a follow up to MIDUS I respondents that were previously surveyed by the MacArthur Midlife  
32  
33 114 Research Network between 1995 and 1996. Based on the sample of 1255 participants, 80%  
34  
35 115 power was achieved to detect small effects of 0.08 or greater with alpha level at 0.05 for a two-  
36  
37 116 tailed test(13, 14).

38  
39 117           **Anthropometrics.** Height was measured in centimeters and recorded to the nearest  
40  
41 118 millimeter. Weight was measured in kilograms and recorded to the nearest decimal place. BMI  
42  
43 119 was calculated by dividing body mass in kilograms by height in meters squared.  
44  
45  
46  
47  
48  
49  
50  
51  
52  
53  
54  
55  
56  
57  
58  
59  
60

1  
2  
3 122 **Categorizing BMI and MMW.** BMI categories were organized into 3 groups: normal  
4  
5  
6 123 weight (BMI  $\leq 24.9$  kg/m<sup>2</sup>), overweight (BMI  $\geq 25$ -29.9) and obese (BMI  $\geq 30$ ).

7  
8 124 The MMW variable was calculated using data provided in the medical history form. The  
9  
10 125 form first described 3 types of regular physical activity(12):

11  
12  
13 126 **Vigorous:** Which causes your heart to beat so rapidly you can feel it in your chest  
14  
15 127 and you perform it long enough to work up a good sweat and breathe heavily (e.g.,  
16  
17 128 competitive sports, running, vigorous swimming, high intensity aerobics, digging  
18  
19 129 in the garden, or lifting heavy objects).

20 130 **Moderate:** Which causes your heart rate to increase slightly and you typically  
21  
22 131 work up a sweat (e.g., leisurely sports like light tennis, slow or light swimming,  
23  
24 132 low intensity aerobics or golfing without a power cart, brisk walking, mowing the  
25  
26 133 lawn with a walking lawnmower).

27 134 **Light:** Which requires little physical effort (e.g., light housekeeping like dusting  
28  
29 135 or laundry, bowling, archery, easy walking, golfing with a power cart or fishing).

30  
31  
32 136 Keeping these definitions in mind, participants were asked if they engaged in regular physical  
33  
34 137 activity of any type for 20 minutes or more at least 3 times per week (yes or no). If participants  
35  
36 138 answered “yes”, they entered up to 7 types of seasonal and/or non-seasonal exercise or activity  
37  
38 139 along with the frequency, duration and intensity.

39  
40  
41 140 MMW were calculated in a 2-step process. Step 1: subjects who reported no physical  
42  
43 141 activity (for whom no MMW calculations could be made) were designated as the no regular  
44  
45 142 exercise group (NRE). Step 2: For subjects who indicated that they performed regular physical  
46  
47 143 activity, total MMW were calculated by multiplying minutes per week by intensity level (1.1 for  
48  
49 144 low, 3.0 for moderate and 6.0 for vigorous) and summed across each non-seasonal activity  
50  
51  
52  
53  
54  
55  
56  
57  
58  
59  
60

1  
2  
3 145 reported. Four groups reflecting participation in physical activity and whether or not their  
4  
5 146 participation was below, at or above USDHHS guidelines were created: NRE (reported no  
6  
7  
8 147 regular physical activity), below recommended (reported >500 MMW), recommended (reported  
9  
10 148 500-1000 MMW) and above recommended (reported >1000 MMW).

11  
12  
13 149 **Blood Collection, Processing and Assays.** Participants were asked to avoid strenuous  
14  
15 150 activity the day of blood collection. Venous blood samples were collected in 10 mL serum  
16  
17 151 separator vacutainers following a 12-h overnight fast and processed at a General Clinical  
18  
19  
20 152 Research Center using standardized procedures. Briefly, following collection, vacutainers were  
21  
22 153 allowed to stand 15-30-min (2-h maximum) prior to centrifugation at 4°C for 20-min at 2000-  
23  
24 154 3000 rpm. Serum samples were frozen and shipped to the MIDUS Biocore Lab and treated  
25  
26  
27 155 and/or analyzed for inflammation markers (IL-6, IL-6sr, CRP, fibrinogen, sE-Selectin and  
28  
29 156 sICAM-1).

30  
31  
32 157 IL-6 and IL-6sr were assayed in the MIDUS Biocore Laboratory (University of Madison,  
33  
34 158 Madison WI) using Quantikine® High-sensitivity ELISA kits (cat# HS600B and cat# DR600,  
35  
36 159 R&D Systems, Minneapolis, MN). Plates were read at 490 and 450 nm, respectively for IL-6  
37  
38 160 and IL-6sr using a Dynex MRXe plate reader (Magellan Biosciences, Chantilly, VA). Intra-  
39  
40 161 assay and inter-assay precision (CV%) for IL-6 was approximately 4.1% and 13.0%. CV%  
41  
42 162 values for IL-6sr were 5.9-5.7% and 2.0%, respectively.

43  
44  
45 163 Assays for sICAM-1, sE-Selectin, fibrinogen and CRP were performed at the Laboratory  
46  
47 164 for Clinical Biochemistry Research (University of Vermont, Burlington, VT). Measurement of  
48  
49 165 sICAM-1 was completed using an ELISA assay (Parameter-Human sICAM-1 Immunoassay;  
50  
51 166 R&D Systems). Inter-assay precision for sICAM-1 was 5.0%. Measurement of sE-selectin was  
52  
53  
54 167 completed using a high-sensitivity ELISA assay (Parameter Human sE-Selectin Immunoassay,  
55  
56  
57  
58  
59  
60



1  
2  
3 168 R&D Systems). Intra-assay and inter-assay precision for sE-selectin was 4.7-5.0% and 5.7-8.8%,  
4  
5 169 respectively. Fibrinogen was measured using the BNII nephelometer (N Antiserum to Human  
6  
7 170 Fibrinogen; Dade Behring Inc., Deerfield, IL). Intra-assay and inter-assay precision for  
8  
9 171 fibrinogen was 2.7% and 2.6%, respectively. CRP was analyzed using a BNII nephelometer  
10  
11 172 with a particle enhanced immunonephelometric assay. Intra-assay and inter-assay precision for  
12  
13 173 CRP was 2.3-4.4% and 2.1-5.7%, respectively.  
14  
15  
16

17 174 **Statistical Analyses.** All variables were assessed for normality and non-normal data  
18  
19 175 were log transformed. To determine the relative impact of MMW and BMI on inflammatory  
20  
21 176 markers, general linear models were performed. For each outcome, the categorical MMW and  
22  
23 177 BMI factors were entered as independent factors with an interaction term. If the interaction term  
24  
25 178 was not significant, the interaction term was dropped and the model was re-fit. All analyses  
26  
27 179 presented in the results were adjusted for confounding variables that are known to affect  
28  
29 180 inflammatory status: age, sex, smoking and relevant medications (cholesterol-lowering,  
30  
31 181 corticosteroids, anti-diabetic, antidepressant, hormone replacement and hormonal contraceptive).  
32  
33 182 Race was initially included as a covariate; however, approximately 200 data points were lost in  
34  
35 183 the analyses due to incomplete racial data. As race was not found to be a predictor of our  
36  
37 184 dependent variables, with the exception of sICAM-1, race was excluded as a covariate to  
38  
39 185 increase sample size in all analyses excluding sICAM-1. In an exploratory analysis, we  
40  
41 186 examined whether the relative effects of BMI and MMW on the inflammatory markers differed  
42  
43 187 by sex in 3-way interaction models. As none of the interactions approached statistical  
44  
45 188 significance, sex was included as a covariate in the models. All statistical analyses were  
46  
47 189 performed with SPSS v. 17 (Chicago, IL) and significance was set at  $P < 0.05$ .  
48  
49  
50  
51  
52  
53  
54

55 190  
56  
57  
58  
59  
60

## 191 RESULTS

192 **Subject Characteristics.** Table 1 presents anthropometric characteristics and plasma  
193 levels of inflammatory biomarkers in all subjects (N=1255). On average, subjects were 92.6%  
194 non-Hispanic white, 56.8% female, middle-aged and overweight. Of all the respondents, 14.9%  
195 were currently smoking, 27.8% were taking cholesterol lowering medication, 12.1% were taking  
196 corticosteroids, 10.4% were taking anti-diabetic medication, 14.2% were taking antidepressant  
197 medication, 7.3% were taking hormone replacement and 2.5% reported contraceptive use. The  
198 percentage of participants with missing data for each variable are as follows: 1.6% for CRP,  
199 1.0% for sICAM-1, 1.0% for IL-6, 1.6% for fibrinogen, 1.2% for sE-selectin, and 1.0% for IL-6sr.

200 **CRP (Figure 1, Panel A).** We found a significant interaction between BMI and MMW  
201 for CRP concentration ( $F=3.022$ ,  $P=0.006$ ). In post hoc comparisons, CRP levels were higher in  
202 overweight and obese subjects compared to normal weight subjects among those who reported  
203 no regular exercise ( $P's < 0.001$ ). However, among subjects who reported any amount of regular  
204 exercise (<500, 500-1000 or >1000 MMW), CRP levels were significantly greater only in obese  
205 subjects compared to both normal weight and overweight subjects ( $P's < 0.01$ ). These results  
206 suggest that regular exercise may mitigate the association between weight and CRP in  
207 overweight individuals. In obese individuals, CRP tended to be lower in those reporting >1000  
208 MMW compared to those reporting no regular exercise ( $P=0.053$ ), suggesting the high levels of  
209 activity only may mitigate elevations in CRP levels in obese individuals

210 We also found main effects of BMI ( $F=130.873$   $P < 0.001$ ) and MMW ( $F=11.576$ ,  
211  $P < 0.001$ ) for CRP. CRP was significantly greater with each increasing BMI category, in a dose-  
212 dependent manner ( $P's < 0.001$ ). Compared to participants who reported no regular exercise,

1  
2  
3 213 CRP was significantly lower in those who reported 500-1000 and >1000 MMW (P's <0.01),  
4  
5  
6 214 with a trend for lower CRP in those who reported <500 MMW of regular exercise (P=0.078).  
7  
8  
9 215

10  
11 216 **sICAM-1 (Figure 1, Panel B).** We found a significant interaction between BMI and  
12  
13 217 MMW for sICAM-1 concentration (F=2.701, P=0.013). Levels of sICAM-1 were significantly  
14  
15 218 lower in obese subjects who reported >1000 MMW compared to obese subjects who reported no  
16  
17 219 regular exercise (P=0.014) and <500 MMW (P=0.026) and tended to be lower than levels in  
18  
19  
20 220 obese subjects who reported 500-1000 MMW (P=0.079), again suggesting that high levels of  
21  
22 221 physical activity could mitigate the increased sICAM-1 associated with obesity. No differences  
23  
24 222 in sICAM-1 by MMW were observed among normal weight or overweight individuals.  
25  
26

27 223 We also observed a main effect of BMI (F=6.060, P=0.002), such that sICAM-1 levels in  
28  
29 224 obese participants were significantly higher than levels found in both normal weight and  
30  
31 225 overweight participants (P's<0.01). No significant main effect of MMW was found for sICAM-1  
32  
33  
34 226 (F=0.931, P=0.425).  
35

36 227 **IL-6 (Figure 1, Panel C).** Both BMI and MMW had independent effects on circulating  
37  
38 228 concentrations of IL-6 (BMI: F=60.150, P<0.001, MMW: F=10.680, P<0.001), with no  
39  
40  
41 229 significant interaction (F=1.21, P=0.297). We found a dose-dependent effect of BMI, such that  
42  
43 230 higher BMI levels were associated with significantly greater IL-6 (P's<0.001). Independent of  
44  
45 231 BMI, IL-6 was significantly lower in subjects who reported regular exercise (<500 MMW, 500-  
46  
47 232 1000 MMW and >1000 MMW) compared to those who reported no regular exercise (P's <0.01)  
48  
49  
50 233 with no difference between levels of MMW.  
51  
52

53 234 **Fibrinogen (Figure 1, Panel D).** BMI significantly contributed to circulating levels of  
54  
55 235 fibrinogen (F=42.385, P<0.001), such that dose-dependent increases were observed for all BMI  
56  
57  
58  
59  
60

1  
2  
3 236 levels ( $P$ 's<0.01). While we observed a trend for lower fibrinogen with regular physical activity,  
4  
5 237 similar to that of IL-6, the effect did not reach statistical significance ( $F=2.187$ ,  $P=0.088$ ). We  
6  
7  
8 238 observed no significant interaction between BMI and MMW for fibrinogen ( $F=1.680$ ,  $P=0.122$ ).

9  
10 239 **sE-Selectin (Figure 1, Panel E).** BMI significantly contributed to circulating levels of  
11  
12 240 sE-selectin ( $F=28.253$ ,  $P<0.001$ ) with no significant contribution by MMW ( $F=0.207$ ,  $P=0.892$ ).  
13  
14  
15 241 Dose-dependent increases in sE-selectin were also observed across BMI levels ( $P$ 's<0.01). We  
16  
17 242 observed no significant interaction between BMI and MMW for sE-selectin ( $F=0.570$ ,  $P=0.755$ ).

18  
19  
20 243 **IL-6sr (Figure 1, Panel F).** No significant main effects for BMI ( $F=1.783$ ,  $P=0.169$ ),  
21  
22 244 MMW ( $F=1.434$ ,  $P=0.231$ ) or their interaction ( $F=0.834$ ,  $P=0.544$ ) were detected for IL-6sr.  
23

24  
25 245

## 26 27 246 **DISCUSSION**

28  
29 247 The current study aimed to delineate the interactive and independent impact of BMI and  
30  
31 248 physical activity on inflammatory markers related to CVD risk. In the cases of CRP and  
32  
33 249 sICAM-1, the effects of BMI and MMW were interactive. Regular physical activity appeared to  
34  
35 250 diminish the effects of higher BMI compared to those who reported no regular physical activity.  
36  
37 251 We found that BMI was strongly and independently related to greater concentrations of both  
38  
39 252 established and emerging inflammatory markers that may increase CVD risk. Independent of  
40  
41 253 BMI, regular physical activity was associated with lower IL-6, with a similar trend for fibrinogen.  
42  
43 254 These results suggest that, although obesity has a clear impact on inflammation, physical activity  
44  
45 255 appears to mitigate at least some of this effect. Further, obese individuals may need to perform  
46  
47 256 levels of physical activity greater than current recommendations for health in order to mitigate  
48  
49 257 obesity-related inflammation, as trends for lower CRP or sICAM-1 were only apparent in obese  
50  
51 258 participants reporting >1000 MMW.  
52  
53  
54  
55  
56  
57  
58  
59  
60

1  
2  
3 2594  
5 260

6  
7  
8 261 Low-grade, systemic inflammation is characterized by elevated levels of inflammatory  
9  
10 262 markers, such as cytokines, acute phase proteins or soluble adhesion molecules. IL-6 produced  
11  
12 263 in hypertrophied adipose tissue(15, 16) initiates the acute phase response, marked by the release  
13  
14 264 of hepatic CRP and fibrinogen(17, 18). Inflammatory cytokines (IL-6) and acute phase proteins  
15  
16 265 (CRP, fibrinogen) stimulate the production of chemoattractant proteins and adhesion molecules  
17  
18 266 (sICAM-1 and sE-selectin) in the vasculature, promoting cell accumulation and atherosclerotic  
19  
20 267 plaque formation(19, 20). In epidemiologic studies, higher levels of IL-6 and CRP are  
21  
22 268 associated with increasing numbers clinical risk factors for cardiovascular disease(21-23).  
23  
24 269 Cardiovascular disease risk is also increased with higher levels of cell adhesion molecules(24,  
25  
26 270 25) and acute phase reactants(22, 26, 27).

27  
28 271 Interactions between BMI and MMW suggest that regular physical activity may be able  
29  
30 272 to mitigate the effect of an overweight BMI on CRP. Overweight individuals had CRP levels  
31  
32 273 that were similar to levels observed in obese individuals if they reported no regular exercise  
33  
34 274 (4.05 and 4.83  $\mu\text{g}/\text{mL}$ , respectively). CRP levels greater than 3  $\mu\text{g}/\text{mL}$  are typically associated  
35  
36 275 with high CVD risk(28). In overweight subjects who reported regular physical activity of at least  
37  
38 276 3, 20-minute sessions per week (be it below [ $<500$ ], within [ $500-1000$ ] or above [ $>1000$ ]  
39  
40 277 USDHHS MMW recommendations), CRP levels were lower and not significantly different from  
41  
42 278 CRP levels found in normal weight participants. This suggests that increasing physical activity  
43  
44 279 level to a minimum of 3 days per week, at least 20 minutes per day, may improve CRP profiles  
45  
46 280 among overweight individuals.

47  
48 281  
49  
50  
51  
52  
53  
54  
55  
56  
57  
58  
59  
60

1  
2  
3 282  
4  
5  
6 283           Obese individuals may require a higher level of regular physical activity in order to lower  
7  
8 284 inflammatory markers. While obese subjects also had greater levels of CRP and sICAM-1  
9  
10 285 compared to lean and overweight subjects, those who reported >1000 MMW (above the  
11  
12 286 USDHHS recommendation) had lower levels of sICAM-1 and tended to have lower CRP than  
13  
14  
15 287 obese subjects reporting no regular physical activity. Taken together, we may speculate that  
16  
17 288 while physical activity levels currently recommended for the general population may reduce  
18  
19 289 particular inflammatory makers in overweight populations, obese populations may require  
20  
21  
22 290 greater levels of physical activity above recommended values to reduce inflammatory markers  
23  
24  
25 291 like CRP and sICAM-1.

26  
27 292           As expected, strong main effects of BMI were observed for CRP, IL-6, fibrinogen,  
28  
29 293 sICAM-1 and sE-selectin, in agreement with previous work(29-32). Independent of BMI effects,  
30  
31 294 our results suggest that physical activity has differentiating independent effects on inflammatory  
32  
33  
34 295 markers. Individuals reporting no regular physical activity had higher levels of IL-6 with a  
35  
36 296 tendency for higher fibrinogen, compared to those reporting any level of regular physical activity  
37  
38  
39 297 (<500, 500-1000 or >1000 MMW). Similar results have been observed in the MONItoring  
40  
41 298 trends and determinants in CARdiovascular disease (MONICA) study(33), the National Health  
42  
43 299 and Nutrition Examination Survey (NHANES III)(34, 35) and the Multi-Ethnic Study of  
44  
45  
46 300 Atherosclerosis (MESA)(36), such that both increased frequency and intensity of physical  
47  
48 301 activity have been related to lower IL-6 and fibrinogen. While similar, our findings add to prior  
49  
50 302 results by standardizing levels of physical activity by using USDHHS recommendations, rather  
51  
52  
53 303 than general tertiles, quartiles, etc.. However, while the USDHHS reports that meeting these  
54  
55 304 recommendations promotes substantial health benefits(11), the impact on specific inflammatory  
56  
57  
58  
59  
60

1  
2  
3 305 markers was not addressed. Our results suggest that, regular physical activity at any level (<500,  
4  
5 306 500-1000, >1000) appears to be associated with lower levels of IL-6 and possibly fibrinogen,  
6  
7  
8 307 independent of BMI.  
9

10  
11 308 Interestingly, in the MIDUS sample, results suggest that regular exercise may have a  
12  
13 309 more profound impact on lowering classical markers of inflammation and less impact on the  
14  
15 310 inflammatory status of the endothelium. Regular physical activity was independently associated  
16  
17 311 with lower levels of IL-6 and CRP, both classical inflammatory markers related to adipose and  
18  
19 312 systemic inflammation(37). However, regular exercise appeared to have no independent impact  
20  
21  
22 313 on markers of endothelial activation, particularly sE-selectin and sICAM-1. Inverse  
23  
24 314 relationships between physical activity and sICAM-1 or sE-selectin have been reported  
25  
26  
27 315 previously, in drug-treated hypertensive men(38). However, cross-sectional reporting of inverse  
28  
29 316 relationships between physical activity and other markers of atherosclerotic activity, particularly  
30  
31 317 carotid arterial wall thickness, has yielded variable results(39-42). Upon reviewing this literature,  
32  
33  
34 318 Thijssen and colleagues suggest that inverse correlations between arterial wall thickness and  
35  
36 319 physical activity were more likely to be found in studies that utilized specifically-designed  
37  
38 320 instruments to assess physical activity, rather than non-specific questionnaires that obtain  
39  
40 321 information about general exercise behavior(43). Therefore, it is possible that a more objective  
41  
42 322 or validated measure of physical activity utilized may have increased the likelihood of observing  
43  
44 323 significant relationships between physical activity and circulating makers of atherosclerotic  
45  
46 324 activity that were independent of BMI.  
47  
48  
49

50 325 Several limitations must be addressed. First, the cross-sectional design does not allow us  
51  
52 326 to infer causal relationships. Prospective and interventional designs are necessary to confirm our  
53  
54 327 findings. Second, the use of self-report physical activity data may reduce accuracy compared to  
55  
56  
57  
58  
59  
60

1  
2  
3 328 direct measures of physical activity. However, in addition to being in line with previous studies  
4  
5 329 using self-report physical activity, our findings are also in line with previous studies(44, 45) that  
6  
7  
8 330 demonstrated that higher cardiorespiratory fitness was associated with lower levels of  
9  
10 331 inflammation independent of visceral adiposity or BMI. Furthermore, regular physical activity  
11  
12 332 may have positive health effects independent of fitness, as individuals of similar fitness levels  
13  
14 333 demonstrate reduced risk for coronary heart disease, CVD and stroke with higher levels of  
15  
16 334 physical activity compared to those with lower activity levels and both low physical activity and  
17  
18 335 fitness levels directly increase risk of metabolic disease and type 2 diabetes mellitus(46, 47).  
19  
20 336 Finally, as the sample was predominantly comprised of non-Hispanic white individuals, findings  
21  
22 337 may not extend to all ethnicities. Finally, BMI and physical activity variables are correlated,  
23  
24 338 potentially raising the concern of small sample sizes in specific categories crossing BMI and  
25  
26 339 MMW. However, the minimum category contained 54 individuals (normal weight individuals  
27  
28 340 reporting no exercise).

29  
30  
31  
32  
33  
34 341 In summary, our results demonstrate both interactive and independent influences of BMI  
35  
36 342 and levels of physical activity on both established and emerging markers of inflammation.  
37  
38 343 Inflammation is both a consequence of obesity and a mechanism promoting CVD. Regular  
39  
40 344 physical activity appears to mitigate the effects of higher BMI on some inflammatory markers,  
41  
42 345 particularly CRP, which is strongly implicated in CVD. More importantly, while any level of  
43  
44 346 regular physical activity may help reduce inflammation in overweight individuals, similar effects  
45  
46 347 in obese individuals may require levels of physical activity that are greater than currently  
47  
48 348 recommended by the USDHHS for general health. It is important that future research aims to  
49  
50 349 elucidate effective exercise levels that can produce anti-inflammatory effects in overweight and  
51  
52 350 obese individuals.  
53  
54  
55  
56  
57  
58  
59  
60



1  
2  
3 3514  
5 352 **ACKNOWLEDGEMENTS**6  
7  
8 353 We thank the staff of the Clinical Research Centers at the University of Wisconsin-Madison,  
9  
10 354 UCLA, and Georgetown University for their effort in conducting the original data collection.11  
12 35513  
14  
15 356 **FUNDING**16  
17 357 KS was supported through a T32 Training Fellowship (Training in Behavioral and Preventive  
18  
19 358 Medicine; T32 HL076134). The original research was supported by a grant from the National  
20  
21 359 Institute on Aging (P01-AG020166) to conduct a longitudinal follow-up of the MIDUS (Midlife  
22  
23 360 in the U.S.) Investigation.24  
25 36126  
27 362 The original study was supported by the John D. and Catherine T. MacArther Foundation  
28  
29 363 Research Network on Successful Midlife Development and by the following grants: M01-  
30  
31 364 RR023942 (Georgetown), M01-RR00865 (UCLA) from the General Clinical Research Centers  
32  
33 365 Program and 1UL1RR025011 (UW) from the Clinical and Translational Science Award (CTSA)  
34  
35 366 program of the National Center for Research Resources, National Institutes of Health.36  
37 36738  
39 368 **CONFLICTS OF INTEREST**40  
41 369 The authors declare no conflict of interest.42  
43 37044  
45 37146  
47 37248  
49 37350  
51  
52  
53  
54  
55  
56  
57  
58  
59  
60

1  
2  
3 374 **CONTRIBUTORSHIP**

4  
5 375 KS, JMM and RRW each made substantial contributions to the conception and design of the  
6  
7  
8 376 study, data acquisition, analysis and interpretation, as well as to drafting and revision for  
9  
10 377 substantial intellectual content. All authors made final approval of the version to be published.  
11

12  
13 378

14  
15 379 **DATA SHARING STATEMENT**

16  
17 380 Data and documentation for MIDUS studies are available at the Inter-university Consortium for  
18  
19 381 Political and Social Research (ICPSR). <http://www.icpsr.umich.edu/icpsrweb/landing.jsp>  
20  
21

22 382

23  
24 383

25  
26  
27 384 **REFERENCES**

- 28  
29 385 1. Blair SN, Brodney S. Effects of physical inactivity and obesity on morbidity and  
30  
31 386 mortality: current evidence and research issues. *Med Sci Sports Exerc.* 1999;**31**(11 Suppl):S646-  
32  
33 387 62.  
34  
35 388 2. Hotamisligil GS. Inflammation and metabolic disorders. *Nature.* 2006;**444**(7121):860-7.  
36  
37 389 3. Koenig W, Khuseyinova N, Baumert J, et al. Increased concentrations of C-reactive  
38  
39 390 protein and IL-6 but not IL-18 are independently associated with incident coronary events in  
40  
41 391 middle-aged men and women: results from the MONICA/KORA Augsburg case-cohort study,  
42  
43 392 1984-2002. *Arterioscler Thromb Vasc Biol.* 2006;**26**(12):2745-51.  
44  
45  
46 393 4. Papageorgiou N, Tousoulis D, Siasos G, et al. Is fibrinogen a marker of inflammation in  
47  
48 394 coronary artery disease? *Hellenic J Cardiol.* 2010;**51**(1):1-9.  
49  
50  
51  
52  
53  
54  
55  
56  
57  
58  
59  
60

- 1  
2  
3 395 5. Schmidt C, Hulthe J, Fagerberg B. Baseline ICAM-1 and VCAM-1 are increased in  
4  
5 396 initially healthy middle-aged men who develop cardiovascular disease during 6.6 years of  
6  
7 397 follow-up. *Angiology*. 2009;**60**(1):108-14.  
8  
9  
10 398 6. Demerath E, Towne B, Blangero J, et al. The relationship of soluble ICAM-1, VCAM-1,  
11  
12 399 P-selectin and E-selectin to cardiovascular disease risk factors in healthy men and women. *Ann*  
13  
14 400 *Hum Biol*. 2001;**28**(6):664-78.  
15  
16  
17 401 7. Rocha VZ, Libby P. Obesity, inflammation, and atherosclerosis. *Nat Rev Cardiol*.  
18  
19 402 2009;**6**(6):399-409.  
20  
21  
22 403 8. Calabro P, Yeh ET. Obesity, inflammation, and vascular disease: the role of the adipose  
23  
24 404 tissue as an endocrine organ. *Subcell Biochem*. 2007;**42**:63-91.  
25  
26  
27 405 9. Kasapis C, Thompson PD. The effects of physical activity on serum C-reactive protein  
28  
29 406 and inflammatory markers: a systematic review. *J Am Coll Cardiol*. 2005;**45**(10):1563-9.  
30  
31  
32 407 10. Petersen AM, Pedersen BK. The anti-inflammatory effect of exercise. *J Appl Physiol*.  
33  
34 408 2005;**98**(4):1154-62.  
35  
36  
37 409 11. USDHHS, editor. 2008 Physical Activity Guidelines for Americans. Washington DC  
38  
39 410 2008.  
40  
41 411 12. C Ryff DA, JS Ayanian, DS carr, PD Cleary, C Coe, R Davidson, RF Krueger, ME  
42  
43 412 Lachman, NF Marks, DK Mroczek, T Seeman, MM Seltzer, BH Singer, RP Sloan, PA Tun, M  
44  
45 413 Weinstein, D Williams. National Survey of Midlife Development in the United State (MIDUS II),  
46  
47 414 2004-2006. Inter-university Consortium for Political and Social Research (ICPSR) [distrubutor].  
48  
49 415 2011.  
50  
51  
52 416 13. Kraemer H. How Many Subjects? Statistical Power Analysis in Research: SAGE  
53  
54 417 Publications, Inc; 1987.  
55  
56  
57  
58  
59  
60

- 1  
2  
3 418 14. Cohen J. Statistical Power Analysis for the Behavioral Sciences. Second ed: Lawrence  
4  
5  
6 419 Erlbaum Associates; 1998.  
7  
8 420 15. Day CP. From fat to inflammation. *Gastroenterology*. 2006;**130**(1):207-10.  
9  
10 421 16. Fain JN, Madan AK, Hiler ML, et al. Comparison of the release of adipokines by adipose  
11  
12 422 tissue, adipose tissue matrix, and adipocytes from visceral and subcutaneous abdominal adipose  
13  
14 423 tissues of obese humans. *Endocrinology*. 2004;**145**(5):2273-82.  
15  
16  
17 424 17. Castell JV, Gomez-Lechon MJ, David M, et al. Interleukin-6 is the major regulator of  
18  
19 425 acute phase protein synthesis in adult human hepatocytes. *FEBS Lett*. 1989;**242**(2):237-9.  
20  
21  
22 426 18. Heinrich PC, Castell JV, Andus T. Interleukin-6 and the acute phase response. *Biochem J*.  
23  
24 427 1990;**265**(3):621-36.  
25  
26  
27 428 19. Tilg H, Moschen AR. Adipocytokines: mediators linking adipose tissue, inflammation  
28  
29 429 and immunity. *Nat Rev Immunol*. 2006;**6**(10):772-83.  
30  
31  
32 430 20. Wisse BE. The inflammatory syndrome: the role of adipose tissue cytokines in metabolic  
33  
34 431 disorders linked to obesity. *J Am Soc Nephrol*. 2004;**15**(11):2792-800.  
35  
36  
37 432 21. Bermudez EA, Rifai N, Buring J, et al. Interrelationships among circulating interleukin-6,  
38  
39 433 C-reactive protein, and traditional cardiovascular risk factors in women. *Arterioscler Thromb*  
40  
41 434 *Vasc Biol*. 2002;**22**(10):1668-73.  
42  
43  
44 435 22. Ridker PM, Hennekens CH, Buring JE, et al. C-reactive protein and other markers of  
45  
46 436 inflammation in the prediction of cardiovascular disease in women. *N Engl J Med*.  
47  
48 437 2000;**342**(12):836-43.  
49  
50  
51 438 23. Ridker PM, Rifai N, Stampfer MJ, et al. Plasma concentration of interleukin-6 and the  
52  
53 439 risk of future myocardial infarction among apparently healthy men. *Circulation*.  
54  
55 440 2000;**101**(15):1767-72.  
56  
57  
58  
59  
60

- 1  
2  
3 441 24. Hwang SJ, Ballantyne CM, Sharrett AR, et al. Circulating adhesion molecules VCAM-1,  
4  
5 442 ICAM-1, and E-selectin in carotid atherosclerosis and incident coronary heart disease cases: the  
6  
7 443 Atherosclerosis Risk In Communities (ARIC) study. *Circulation*. 1997;**96**(12):4219-25.  
8  
9  
10 444 25. Ridker PM, Hennekens CH, Roitman-Johnson B, et al. Plasma concentration of soluble  
11  
12 445 intercellular adhesion molecule 1 and risks of future myocardial infarction in apparently healthy  
13  
14 446 men. *Lancet*. 1998;**351**(9096):88-92.  
15  
16  
17 447 26. Ridker PM, Cushman M, Stampfer MJ, et al. Inflammation, aspirin, and the risk of  
18  
19 448 cardiovascular disease in apparently healthy men. *N Engl J Med*. 1997;**336**(14):973-9.  
20  
21  
22 449 27. Danesh J, Whincup P, Walker M, et al. Low grade inflammation and coronary heart  
23  
24 450 disease: prospective study and updated meta-analyses. *BMJ*. 2000;**321**(7255):199-204.  
25  
26  
27 451 28. Bassuk SS, Rifai N, Ridker PM. High-sensitivity C-reactive protein: clinical importance.  
28  
29 452 *Curr Probl Cardiol*. 2004;**29**(8):439-93.  
30  
31  
32 453 29. Park HS, Park JY, Yu R. Relationship of obesity and visceral adiposity with serum  
33  
34 454 concentrations of CRP, TNF-alpha and IL-6. *Diabetes Res Clin Pract*. 2005;**69**(1):29-35.  
35  
36 455 30. Bastard JP, Jardel C, Bruckert E, et al. Elevated levels of interleukin 6 are reduced in  
37  
38 456 serum and subcutaneous adipose tissue of obese women after weight loss. *J Clin Endocrinol*  
39  
40 457 *Metab*. 2000;**85**(9):3338-42.  
41  
42  
43 458 31. Ditschuneit HH, Flechtner-Mors M, Adler G. Fibrinogen in obesity before and after  
44  
45 459 weight reduction. *Obes Res*. 1995;**3**(1):43-8.  
46  
47  
48 460 32. Straczkowski M, Lewczuk P, Dzienis-Straczkowska S, et al. Elevated soluble  
49  
50 461 intercellular adhesion molecule-1 levels in obesity: relationship to insulin resistance and tumor  
51  
52 462 necrosis factor-alpha system activity. *Metabolism*. 2002;**51**(1):75-8.  
53  
54  
55  
56  
57  
58  
59  
60

- 1  
2  
3 463 33. Autenrieth C, Schneider A, Doring A, et al. Association between different domains of  
4  
5 464 physical activity and markers of inflammation. *Med Sci Sports Exerc.* 2009;**41**(9):1706-13.  
6  
7  
8 465 34. Abramson JL, Vaccarino V. Relationship between physical activity and inflammation  
9  
10 466 among apparently healthy middle-aged and older US adults. *Arch Intern Med.*  
11  
12 467 2002;**162**(11):1286-92.  
13  
14  
15 468 35. King DE, Carek P, Mainous AG, 3rd, et al. Inflammatory markers and exercise:  
16  
17 469 differences related to exercise type. *Med Sci Sports Exerc.* 2003;**35**(4):575-81.  
18  
19  
20 470 36. Majka DS, Chang RW, Vu TH, et al. Physical activity and high-sensitivity C-reactive  
21  
22 471 protein: the multi-ethnic study of atherosclerosis. *Am J Prev Med.* 2009;**36**(1):56-62.  
23  
24  
25 472 37. Mathieu P, Lemieux I, Despres JP. Obesity, inflammation, and cardiovascular risk. *Clin*  
26  
27 473 *Pharmacol Ther.* 2010;**87**(4):407-16.  
28  
29  
30 474 38. Hjelstuen A, Anderssen SA, Holme I, et al. Markers of inflammation are inversely related  
31  
32 475 to physical activity and fitness in sedentary men with treated hypertension. *Am J Hypertens.*  
33  
34 476 2006;**19**(7):669-75; discussion 76-7.  
35  
36  
37 477 39. Yamada S, Inaba M, Goto H, et al. Associations between physical activity, peripheral  
38  
39 478 atherosclerosis and bone status in healthy Japanese women. *Atherosclerosis.* 2006;**188**(1):196-  
40  
41 479 202.  
42  
43  
44 480 40. Juonala M, Viikari JS, Kahonen M, et al. Life-time risk factors and progression of carotid  
45  
46 481 atherosclerosis in young adults: the Cardiovascular Risk in Young Finns study. *Eur Heart J.*  
47  
48 482 2010;**31**(14):1745-51.  
49  
50  
51 483 41. Stensland-Bugge E, Bonna KH, Joakimsen O. Age and sex differences in the relationship  
52  
53 484 between inherited and lifestyle risk factors and subclinical carotid atherosclerosis: the Tromso  
54  
55 485 study. *Atherosclerosis.* 2001;**154**(2):437-48.  
56  
57  
58  
59  
60

- 1  
2  
3 486 42. Nordstrom CK, Dwyer KM, Merz CN, et al. Leisure time physical activity and early  
4  
5 487 atherosclerosis: the Los Angeles Atherosclerosis Study. *Am J Med.* 2003;**115**(1):19-25.  
6  
7  
8 488 43. Thijssen DH, Cable NT, Green DJ. Impact of exercise training on arterial wall thickness  
9  
10 489 in humans. *Clin Sci (Lond).* 2012;**122**(7):311-22.  
11  
12 490 44. Church TS, Barlow CE, Earnest CP, et al. Associations between cardiorespiratory fitness  
13 491 and C-reactive protein in men. *Arterioscler Thromb Vasc Biol.* 2002;**22**(11):1869-76.  
14  
15 492 45. Arsenault BJ, Cartier A, Cote M, et al. Body composition, cardiorespiratory fitness, and  
16 493 low-grade inflammation in middle-aged men and women. *Am J Cardiol.* 2009;**104**(2):240-6.  
17  
18 494 46. Blair SN, Cheng Y, Holder JS. Is physical activity or physical fitness more important in  
19 495 defining health benefits? *Med Sci Sports Exerc.* 2001;**33**(6 Suppl):S379-99; discussion S419-20.  
20  
21 496 47. Telford RD. Low physical activity and obesity: causes of chronic disease or simply  
22 497 predictors? *Med Sci Sports Exerc.* 2007;**39**(8):1233-40.  
23  
24  
25  
26  
27  
28  
29  
30  
31  
32  
33  
34  
35  
36  
37  
38  
39  
40  
41  
42  
43  
44  
45  
46  
47  
48  
49  
50  
51  
52  
53  
54  
55  
56  
57  
58  
59  
60

1  
2  
3 5094  
5 5106  
7  
8 5119  
10 51211  
12 51313  
14 51415  
16 51517  
18 51619  
20 51721  
22 51823  
24  
25  
26  
27 519 **FIGURE AND TABLE LEGENDS**28  
29 52030  
31 52132  
33  
34 522 **Figure 1: Inflammatory Markers.** Data from 1255 men and women in MIDUS. Joint35  
36 523 association of BMI category (normal, overweight and obese) and MMW category (no regular37  
38 524 exercise, <500 MMW, 500-1000 MMW and >1000 MMW) for CRP (A), sICAM-1 (B), IL-6 (C),39  
40 525 fibrinogen (D), sE-Selectin (E) and IL-6sr (F). These analyses were adjusted for age, sex,41  
42 526 smoking and relevant medication use. Error bars represent SEM. BMI=BMI main effect P value,43  
44 527 MMW=MMW main effect P value, INT=interaction effect P value.45  
46  
47  
48 52849  
50 52951  
52  
53  
54  
55  
56  
57  
58  
59  
60



1  
2  
3 530 **Table 1: Subject Characteristics.** BMI = body mass index; CRP = C-reactive protein; IL =  
4  
5  
6 531 interleukin; IL-6sr = IL-6 soluble receptor; MMW = MET-Minutes per Week; sE-Selectin =  
7  
8 532 soluble E-Selectin; sICAM-1= soluble intracellular adhesion molecule-1.  
9

10 533  
11  
12  
13  
14  
15  
16  
17  
18  
19  
20  
21  
22  
23  
24  
25  
26  
27  
28  
29  
30  
31  
32  
33  
34  
35  
36  
37  
38  
39  
40  
41  
42  
43  
44  
45  
46  
47  
48  
49  
50  
51  
52  
53  
54  
55  
56  
57  
58  
59  
60

For peer review only

| <b>Demographic Variables</b> | <b>Overall N = 1255<br/>Mean ± SD (N)</b> |
|------------------------------|-------------------------------------------|
| Age (years)                  | 54.5 ± 11.7 (1255)                        |
| Gender (%)                   |                                           |
| Male                         | 43.20 (542)                               |
| Female                       | 56.80 (713)                               |
| Race (%)                     |                                           |
| Non-Hispanic White           | 92.60 (974)                               |
| Hispanic                     | 0.05 (5)                                  |
| African American             | 2.60 (27)                                 |
| Asian/Pacific Islander       | 0.30 (3)                                  |
| Native American              | 1.30 (14)                                 |
| Other                        | 2.30 (29)                                 |
| Medication Use (%)           |                                           |
| Cholesterol-Lowering         | 27.80 (349)                               |
| Corticosteroids              | 12.10 (152)                               |
| Anti-Diabetic                | 10.40 (130)                               |
| Antidepressant               | 14.2 (178)                                |
| Hormone Replacement Therapy  | 7.3 (92)                                  |
| Oral Contraceptive           | 2.5 (31)                                  |
| Currently Smoking            | 14.90 (187)                               |
| BMI (kg/m <sup>2</sup> )     | 29.8 ± 6.6 (1254)                         |
| IL-6 (pg/mL)                 | 3.0 ± 3.1 (1243)                          |
| IL-6sr (pg/mL)               | 35184.7 ± 10359.1 (1243)                  |
| CRP (µg/mL)                  | 3.0 ± 4.8 (1235)                          |
| Fibrinogen (mg/dL)           | 348.9 ± 87.9 (1235)                       |
| sE-Selectin (ng/mL)          | 43.4 ± 22.7 (1242)                        |
| sICAM-1 (ng/mL)              | 288.6 ± 115.6 (1242)                      |

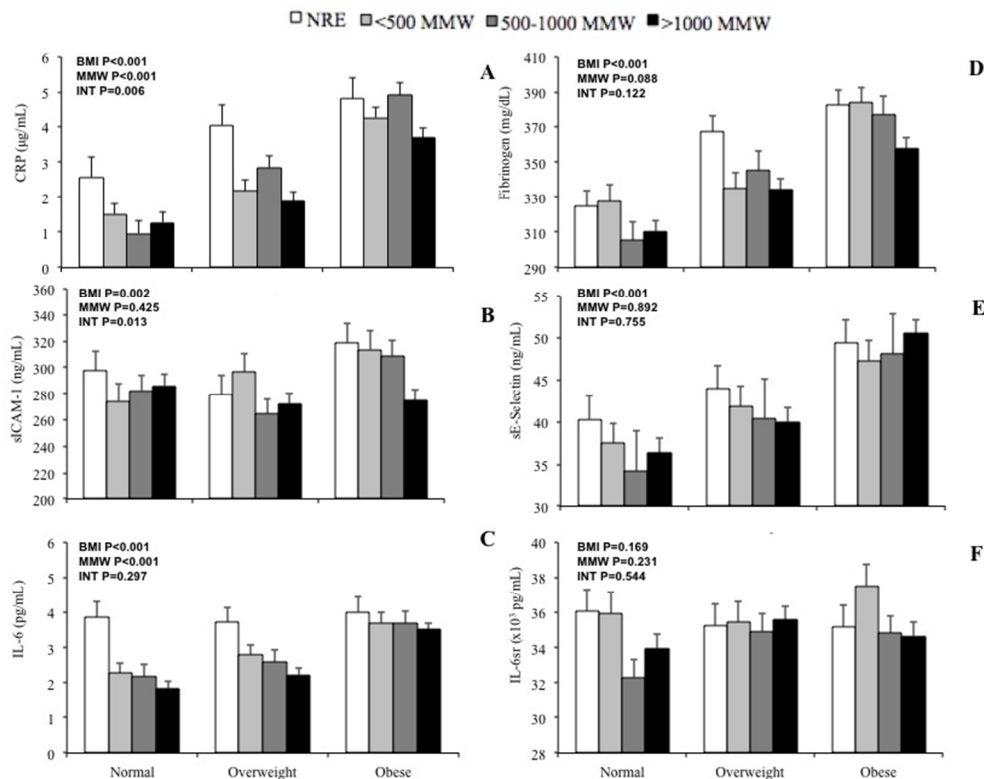

Figure 1: Inflammatory Markers. Data from 1255 men and women in MIDUS. Joint association of BMI category (normal, overweight and obese) and MMW category (no regular exercise, <500 MMW, 500-1000 MMW and >1000 MMW) for CRP (A), sICAM-1 (B), IL-6 (C), fibrinogen (D), sE-Selectin (E) and IL-6sr (F). These analyses were adjusted for age, sex, smoking and relevant medication use. Error bars represent SEM. BMI=BMI main effect P value, MMW=MMW main effect P value, INT=interaction effect P value. 292x229mm (72 x 72 DPI)

only

**STROBE 2007 (v4) checklist of items to be included in reports of observational studies in epidemiology\***  
**Checklist for cohort, case-control, and cross-sectional studies (combined)**

| Section/Topic             | Item # | Recommendation                                                                                                                                                                                                                                                                                                                                                                                                                                                         | Reported on page # |
|---------------------------|--------|------------------------------------------------------------------------------------------------------------------------------------------------------------------------------------------------------------------------------------------------------------------------------------------------------------------------------------------------------------------------------------------------------------------------------------------------------------------------|--------------------|
| Title and abstract        | 1      | (a) Indicate the study's design with a commonly used term in the title or the abstract                                                                                                                                                                                                                                                                                                                                                                                 | 1                  |
|                           |        | (b) Provide in the abstract an informative and balanced summary of what was done and what was found                                                                                                                                                                                                                                                                                                                                                                    | 2                  |
| <b>Introduction</b>       |        |                                                                                                                                                                                                                                                                                                                                                                                                                                                                        |                    |
| Background/rationale      | 2      | Explain the scientific background and rationale for the investigation being reported                                                                                                                                                                                                                                                                                                                                                                                   | 3                  |
| Objectives                | 3      | State specific objectives, including any pre-specified hypotheses                                                                                                                                                                                                                                                                                                                                                                                                      | 3                  |
| <b>Methods</b>            |        |                                                                                                                                                                                                                                                                                                                                                                                                                                                                        |                    |
| Study design              | 4      | Present key elements of study design early in the paper                                                                                                                                                                                                                                                                                                                                                                                                                | 4                  |
| Setting                   | 5      | Describe the setting, locations, and relevant dates, including periods of recruitment, exposure, follow-up, and data collection                                                                                                                                                                                                                                                                                                                                        | 4                  |
| Participants              | 6      | (a) <i>Cohort study</i> —Give the eligibility criteria, and the sources and methods of selection of participants. Describe methods of follow-up<br><i>Case-control study</i> —Give the eligibility criteria, and the sources and methods of case ascertainment and control selection. Give the rationale for the choice of cases and controls<br><i>Cross-sectional study</i> —Give the eligibility criteria, and the sources and methods of selection of participants | 4                  |
|                           |        | (b) <i>Cohort study</i> —For matched studies, give matching criteria and number of exposed and unexposed<br><i>Case-control study</i> —For matched studies, give matching criteria and the number of controls per case                                                                                                                                                                                                                                                 | N/A                |
| Variables                 | 7      | Clearly define all outcomes, exposures, predictors, potential confounders, and effect modifiers. Give diagnostic criteria, if applicable                                                                                                                                                                                                                                                                                                                               | 4-7                |
| Data sources/ measurement | 8*     | For each variable of interest, give sources of data and details of methods of assessment (measurement). Describe comparability of assessment methods if there is more than one group                                                                                                                                                                                                                                                                                   | 4-7                |
| Bias                      | 9      | Describe any efforts to address potential sources of bias                                                                                                                                                                                                                                                                                                                                                                                                              | 7                  |
| Study size                | 10     | Explain how the study size was arrived at                                                                                                                                                                                                                                                                                                                                                                                                                              | 4                  |
| Quantitative variables    | 11     | Explain how quantitative variables were handled in the analyses. If applicable, describe which groupings were chosen and why                                                                                                                                                                                                                                                                                                                                           | 4-7                |
| Statistical methods       | 12     | (a) Describe all statistical methods, including those used to control for confounding                                                                                                                                                                                                                                                                                                                                                                                  | 7                  |
|                           |        | (b) Describe any methods used to examine subgroups and interactions                                                                                                                                                                                                                                                                                                                                                                                                    | 7                  |
|                           |        | (c) Explain how missing data were addressed                                                                                                                                                                                                                                                                                                                                                                                                                            | 7                  |
|                           |        | (d) <i>Cohort study</i> —If applicable, explain how loss to follow-up was addressed<br><i>Case-control study</i> —If applicable, explain how matching of cases and controls was addressed                                                                                                                                                                                                                                                                              | N/A                |

|                          |     |                                                                                                                                                                                                              |      |
|--------------------------|-----|--------------------------------------------------------------------------------------------------------------------------------------------------------------------------------------------------------------|------|
|                          |     | <i>Cross-sectional study</i> —If applicable, describe analytical methods taking account of sampling strategy                                                                                                 |      |
|                          |     | (e) Describe any sensitivity analyses                                                                                                                                                                        | N/A  |
| <b>Results</b>           |     |                                                                                                                                                                                                              |      |
| Participants             | 13* | (a) Report numbers of individuals at each stage of study—eg numbers potentially eligible, examined for eligibility, confirmed eligible, included in the study, completing follow-up, and analysed            | 8    |
|                          |     | (b) Give reasons for non-participation at each stage                                                                                                                                                         | N/A  |
|                          |     | (c) Consider use of a flow diagram                                                                                                                                                                           | N/A  |
| Descriptive data         | 14* | (a) Give characteristics of study participants (eg demographic, clinical, social) and information on exposures and potential confounders                                                                     | 8    |
|                          |     | (b) Indicate number of participants with missing data for each variable of interest                                                                                                                          | 8    |
|                          |     | (c) <i>Cohort study</i> —Summarise follow-up time (eg, average and total amount)                                                                                                                             | N/A  |
| Outcome data             | 15* | <i>Cohort study</i> —Report numbers of outcome events or summary measures over time                                                                                                                          |      |
|                          |     | <i>Case-control study</i> —Report numbers in each exposure category, or summary measures of exposure                                                                                                         |      |
|                          |     | <i>Cross-sectional study</i> —Report numbers of outcome events or summary measures                                                                                                                           | 8-10 |
| Main results             | 16  | (a) Give unadjusted estimates and, if applicable, confounder-adjusted estimates and their precision (eg, 95% confidence interval). Make clear which confounders were adjusted for and why they were included | 8-10 |
|                          |     | (b) Report category boundaries when continuous variables were categorized                                                                                                                                    | 8-10 |
|                          |     | (c) If relevant, consider translating estimates of relative risk into absolute risk for a meaningful time period                                                                                             | N/A  |
| Other analyses           | 17  | Report other analyses done—eg analyses of subgroups and interactions, and sensitivity analyses                                                                                                               | N/A  |
| <b>Discussion</b>        |     |                                                                                                                                                                                                              |      |
| Key results              | 18  | Summarise key results with reference to study objectives                                                                                                                                                     | 10   |
| Limitations              | 19  | Discuss limitations of the study, taking into account sources of potential bias or imprecision. Discuss both direction and magnitude of any potential bias                                                   | 13   |
| Interpretation           | 20  | Give a cautious overall interpretation of results considering objectives, limitations, multiplicity of analyses, results from similar studies, and other relevant evidence                                   | 14   |
| Generalisability         | 21  | Discuss the generalisability (external validity) of the study results                                                                                                                                        | 14   |
| <b>Other information</b> |     |                                                                                                                                                                                                              |      |
| Funding                  | 22  | Give the source of funding and the role of the funders for the present study and, if applicable, for the original study on which the present article is based                                                | 15   |

\*Give information separately for cases and controls in case-control studies and, if applicable, for exposed and unexposed groups in cohort and cross-sectional studies.

**Note:** An Explanation and Elaboration article discusses each checklist item and gives methodological background and published examples of transparent reporting. The STROBE checklist is best used in conjunction with this article (freely available on the Web sites of PLoS Medicine at <http://www.plosmedicine.org/>, Annals of Internal Medicine at <http://www.annals.org/>, and Epidemiology at <http://www.epidem.com/>). Information on the STROBE Initiative is available at [www.strobe-statement.org](http://www.strobe-statement.org).

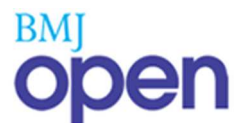

**Contributions of Body Mass Index and Exercise Habits on  
Inflammatory Markers: A Cohort Study of Middle Aged  
Adults Living in the United States**

|                                    |                                                                                   |
|------------------------------------|-----------------------------------------------------------------------------------|
| Journal:                           | <i>BMJ Open</i>                                                                   |
| Manuscript ID:                     | bmjopen-2013-002623.R1                                                            |
| Article Type:                      | Research                                                                          |
| Date Submitted by the Author:      | 18-Mar-2013                                                                       |
| Complete List of Authors:          | Strohacker, Kelley<br>McCaffery, Jeanne<br>wing, rena                             |
| <b>Primary Subject<br>Heading</b>: | Epidemiology                                                                      |
| Secondary Subject Heading:         | Immunology (including allergy)                                                    |
| Keywords:                          | Immunology < BASIC SCIENCES, EPIDEMIOLOGY, Public health <<br>INFECTIOUS DISEASES |
|                                    |                                                                                   |

SCHOLARONE™  
Manuscripts

1  
2  
3 1 **Contributions of Body Mass Index and Exercise Habits on Inflammatory Markers: A**  
4 2 **Cohort Study of Middle Aged Adults Living in the United States**  
5  
6 3  
7 4  
8 5

9 6 Kelley Strohacker, Ph.D.<sup>a</sup>, Rena R. Wing, Ph.D.<sup>a</sup>, and Jeanne M. McCaffery, Ph.D.<sup>a</sup>  
10 7  
11 8  
12 9

13  
14 10 <sup>a</sup>The Miriam Hospital and the Warren Alpert Medical School of Brown University, Providence  
15 11 RI  
16 12  
17 13  
18 14

19  
20  
21 15 Corresponding Author  
22

23 16 Jeanne M. McCaffery, Ph.D.  
24

25  
26 17 Associate Professor of Psychiatry and Human Behavior (Research)  
27

28 18 The Miriam Hospital Weight Control and Diabetes Research Center  
29

30 19 196 Richmond Street  
31

32  
33 20 Providence, RI 02904  
34

35 21 Phone: (401) 793-8010  
36

37 22 Fax: (401) 793-8944  
38

39  
40 23 Email: JMccaffery@lifespan.org  
41

42 24  
43  
44 25  
45  
46 26 Running Title:  
47

48  
49 27 BMI, Physical Activity and Inflammation  
50

51 28  
52  
53  
54 29 **Key Words:** MIDUS, Intracellular Adhesion Molecule-1, Fibrinogen, C-Reactive Protein  
55

56 30 **Word Count: 3331**  
57  
58  
59  
60

1  
2  
3 31 **ABSTRACT**  
4  
5

6 32 **Objectives.** Determine whether body mass index (BMI) and physical activity (PA) above, at or  
7  
8 33 below MET-minute per week (MMW) levels recommended in the 2008 Physical Activity  
9  
10 34 Guidelines interact or have additive effects on interleukin (IL)-6, C-reactive protein (CRP),  
11  
12 35 fibrinogen, IL-6 soluble receptor (IL-6sr), soluble E-selectin and soluble intracellular adhesion  
13  
14 36 molecule (sICAM)-1. **Design.** Archived cohort data (N=1254, age 54.5±11.7y, BMI  
15  
16 37 29.8±6.6kg/m<sup>2</sup>) from the National Survey of Midlife Development in the United States (MIDUS)  
17  
18 38 Biomarkers Study were analyzed for concentrations of inflammatory markers using general  
19  
20 39 linear models. MMW was defined as no regular exercise, <500 MMW, 500-1000 MMW, >1000  
21  
22 40 MMW and BMI was defined as <25, 25-29.9, ≥30 kg/m<sup>2</sup>. Analyses were adjusted for age, sex,  
23  
24 41 smoking and relevant medication use. **Setting.** Respondents reported to three centers to  
25  
26 42 complete questionnaires and provide blood samples. **Participants.** Participants were men and  
27  
28 43 women currently enrolled in the MIDUS Biomarker Project (N=1254, 93% non-hispanic white,  
29  
30 44 average age 54.5y). **Primary Outcome Measures.** Concentration of serum IL-6, CRP,  
31  
32 45 fibrinogen, IL-6sr, sE-selectin and sICAM. **Results.** Significant interactions were found  
33  
34 46 between BMI and MMW for CRP and sICAM-1 (P's<0.05). CRP in overweight individuals was  
35  
36 47 similar to obese when no PA was reported, but was similar to normal weight when any level of  
37  
38 48 regular PA was reported. sICAM-1 was differentially lower in obese individuals who reported  
39  
40 49 >1000 MMW compared to obese individuals reporting less exercise. **Conclusion.** The  
41  
42 50 association of exercise with CRP and sICAM-1 differed by BMI, suggesting that regular exercise  
43  
44 51 may buffer weight-associated elevations in CRP in overweight individuals while higher levels of  
45  
46 52 exercise may be necessary to reduce sICAM-1 or CRP in obese individuals. **Trial Registry.**  
47  
48 53  
49  
50  
51  
52  
53  
54  
55  
56 53 N/A.  
57  
58  
59  
60



## 54 INTRODUCTION

55 Obesity paired with low physical activity is well known to increase morbidity and mortality  
56 related to cardiovascular disease (CVD)(1). It is less clear, however, whether the benefits of  
57 higher levels of physical activity differ among normal weight, overweight, and obese individuals.

58 Chronic, low-grade inflammation, marked by elevations in cytokines, acute phase  
59 reactants and soluble adhesion molecules, is a developing CVD risk factor(2, 3). Circulating  
60 Interleukin-6 (IL-6) and, C-reactive protein (CRP) are both considered established inflammatory  
61 markers related to CVD(3). Fibrinogen, soluble intracellular adhesion molecule (sICAM-1) and  
62 soluble e-selectin (sE-selectin) also have key roles in the progression of CVD and have been  
63 associated with elevated risk(4-6). Obesity is strongly associated with greater concentrations of  
64 inflammatory markers(7, 8). Further, body fat distribution is also an important factor relating to  
65 inflammatory status. Accumulation of fat in visceral depots is more strongly associated with  
66 low-grade inflammation compared to accumulation of fat in subcutaneous or hip-region depots(9,  
67 10).

68 The effects of physical activity on markers of inflammation are more complex and may  
69 vary depending on body weight. A number of epidemiological studies have shown an inverse  
70 relationship between physical activity and CRP and IL-6, independent of obesity(11-16).

71 Laboratory studies conducted in aerobically trained, typically normal weight, individuals have  
72 demonstrated that a single bout of exercise stimulates IL-6 release from skeletal muscle, which  
73 promotes anti-inflammatory effects (17-19), as opposed to adipose tissue-derived IL-6 that is  
74 associated with pro-inflammatory effects (20). Randomized controlled trials have also been  
75 conducted, often in populations that also tend to be overweight or obese, to examine the effects

1  
2  
3 76 of aerobic exercise interventions on inflammation and the results are mixed (21). Thus, the  
4  
5 77 contribution of physical activity to inflammation in the context of obesity remains unclear.  
6  
7

8 The purpose of our study was to disentangle the relative contributions of BMI and  
9  
10 79 physical activity recorded in MET-minutes per week (MMW) to circulating levels of IL-6, IL-6sr,  
11  
12 80 CRP, sICAM-1 and sE-selectin in middle-aged adults. MMW categories for this study were  
13  
14 81 determined using values put forth by the Physical Activity Guidelines for Americans, which  
15  
16 82 states that total weekly physical activity in the range of 500-1000 MET-minutes (approximately  
17  
18 83 equivalent to 150-300 minutes of moderate or 75-150 minutes of vigorous activity per week)  
19  
20 84 produces substantial health benefits for adults(22). We hypothesized that BMI and MMW would  
21  
22 85 interact, such that greater MMW reported would lessen the impact of obesity on markers of  
23  
24 86 inflammation.  
25  
26  
27  
28  
29  
30  
31

## 32 88 **MATERIALS AND METHODS**

33  
34 89 **Design and Sample.** This study was a cross-sectional analysis of archived data (BMI,  
35  
36 90 self-reported physical activity and inflammatory biomarker concentrations) from 1254  
37  
38 91 respondents who provided consent (as approved by The University of Wisconsin Madison Health  
39  
40 92 Sciences Institutional Review Board) and were subsequently enrolled in the National Survey of  
41  
42 93 Midlife Development in the United States (MIDUS) Biomarkers Study (23). The Biomarker  
43  
44 94 Project was one of 5 projects within MIDUS II, with the purpose of adding comprehensive  
45  
46 95 biological assessments on a subsample of the MIDUS participants to further understand age-  
47  
48 96 related differences in physical and mental health. Participants were eligible for The Biomarker  
49  
50 97 Project if they were previously enrolled in MIDUS I, which recruited non-institutionalized,  
51  
52 98 English-speaking adults residing in the contiguous United States aged 25-74. The random digit  
53  
54  
55  
56  
57  
58  
59  
60

1  
2  
3 99 dialing sample for the parent study was selected from working telephone banks and a list of all  
4  
5  
6 100 individuals between the ages of 25 and 74 years within each household was generated in order to  
7  
8 101 select a random respondent. Those who agreed to participate in the Biomarker Study stayed  
9  
10 102 overnight at one of three General Clinical Research Centers: University of California Los  
11  
12 103 Angeles, University of Wisconsin-Madison and Georgetown University. Upon arrival, each  
13  
14  
15 104 respondent provided a detailed medical history (including physical activity levels) and provided  
16  
17 105 all prescription, over-the-counter, and alternative medications to be inventoried by project staff.  
18  
19  
20 106 Following an overnight stay, morning fasting blood samples were obtained. Cohorts were  
21  
22 107 assessed between July 2004 and May 2009 as a follow up to MIDUS I respondents that were  
23  
24 108 previously surveyed by the MacArthur Midlife Research Network between 1995 and 1996.  
25  
26  
27 109 Based on the sample of 1254 participants, 80% power was achieved to detect small effects of  
28  
29 110 0.08 or greater with alpha level at 0.05 for a two-tailed test(24, 25).

31  
32 111 **Anthropometrics.** Height was measured in centimeters and recorded to the nearest  
33  
34 112 millimeter. A single measure of WC was taken directly on the skin or over a single layer of light,  
35  
36 113 close-fitting clothing at the narrowest point between ribs and the iliac crest in centimeters to the  
37  
38 114 nearest millimeter. Weight was measured in kilograms and BMI was calculated by dividing  
39  
40 115 body mass in kilograms by height in meters squared. BMI categories were organized into 3  
41  
42 116 groups: normal weight ( $BMI \leq 24.9 \text{ kg/m}^2$ ), overweight ( $BMI \geq 25-29.9$ ) and obese ( $BMI \geq 30$ ).

43  
44  
45  
46 117 **Categorizing Physical Activity by MET-Minutes per Week (MMW).**

47  
48 118 The MMW variable was calculated using data provided in the medical history form. The  
49  
50 119 form first described 3 types of regular physical activity(23):

51  
52  
53 120 ***Vigorous:** Which causes your heart to beat so rapidly you can feel it in your chest*  
54  
55 121 *and you perform it long enough to work up a good sweat and breathe heavily (e.g.,*

1  
2  
3 122 *competitive sports, running, vigorous swimming, high intensity aerobics, digging*  
4  
5 123 *in the garden, or lifting heavy objects).*

7  
8 124 **Moderate:** *Which causes your heart rate to increase slightly and you typically*  
9  
10 125 *work up a sweat (e.g., leisurely sports like light tennis, slow or light swimming,*  
11  
12 126 *low intensity aerobics or golfing without a power cart, brisk walking, mowing the*  
13  
14 127 *lawn with a walking lawnmower).*

15 128 **Light:** *Which requires little physical effort (e.g., light housekeeping like dusting*  
16  
17 129 *or laundry, bowling, archery, easy walking, golfing with a power cart or fishing).*

18  
19  
20 130 Keeping these definitions in mind, participants were asked if they engaged in regular physical  
21  
22 131 activity of any type for 20 minutes or more at least 3 times per week (yes or no). If participants  
23  
24 132 answered “yes”, they entered up to 7 types of seasonal and/or non-seasonal exercise or activity  
25  
26 133 along with the frequency, duration and intensity.

27  
28  
29 134 MMW were calculated in a 2-step process. Step 1: subjects who reported no physical  
30  
31 135 activity (for whom no MMW calculations could be made) were designated as the no regular  
32  
33 136 exercise group (NRE). Step 2: For subjects who indicated that they performed regular physical  
34  
35 137 activity, total MMW were calculated by multiplying minutes per week by intensity level (1.1 for  
36  
37 138 low, 3.0 for moderate and 6.0 for vigorous) and summed across each non-seasonal activity  
38  
39 139 reported. Four groups reflecting participation in physical activity and whether or not their  
40  
41 140 participation was below, at or above USDHHS guidelines were created: NRE (reported no  
42  
43 141 regular physical activity), below recommended (reported <500 MMW), recommended (reported  
44  
45 142 500-1000 MMW) and above recommended (reported >1000 MMW).

46  
47  
48 143 **Blood Collection, Processing and Assays.** Participants were asked to avoid strenuous  
49  
50 144 activity the day of blood collection. Venous blood samples were collected in 10 mL serum  
51  
52  
53  
54  
55  
56  
57  
58  
59  
60

1  
2  
3 145 separator vacutainers following a 12-h overnight fast and processed at a General Clinical  
4  
5 146 Research Center using standardized procedures. Blood samples were not collected at any  
6  
7  
8 147 specific point during the menstrual cycle in female participants. Briefly, following collection,  
9  
10 148 vacutainers were allowed to stand 15-30-min (2-h maximum) prior to centrifugation at 4°C for  
11  
12 149 20-min at 2000-3000 rpm. Serum samples were frozen and shipped to the MIDUS Biocore Lab  
13  
14 150 and treated and/or analyzed for inflammation markers (IL-6, IL-6sr, CRP, fibrinogen, sE-  
15  
16 151 Selectin and sICAM-1).  
17  
18

19  
20 152 IL-6 and IL-6sr were assayed in the MIDUS Biocore Laboratory (University of Madison,  
21  
22 153 Madison WI) using Quantikine® High-sensitivity ELISA kits (cat# HS600B and cat# DR600,  
23  
24 154 R&D Systems, Minneapolis, MN). Plates were read at 490 and 450 nm, respectively for IL-6  
25  
26 155 and IL-6sr using a Dynex MRXe plate reader (Magellan Biosciences, Chantilly, VA). Intra-  
27  
28 156 assay and inter-assay precision (CV%) for IL-6 was approximately 4.1% and 13.0%. CV%  
29  
30 157 values for IL-6sr were 5.9-5.7% and 2.0%, respectively.  
31  
32  
33

34 158 Assays for sICAM-1, sE-Selectin, fibrinogen and CRP were performed at the Laboratory  
35  
36 159 for Clinical Biochemistry Research (University of Vermont, Burlington, VT). Measurement of  
37  
38 160 sICAM-1 was completed using an ELISA assay (Parameter-Human sICAM-1 Immunoassay;  
39  
40 161 R&D Systems). Inter-assay precision for sICAM-1 was 5.0%. Measurement of sE-selectin was  
41  
42 162 completed using a high-sensitivity ELISA assay (Parameter Human sE-Selectin Immunoassay,  
43  
44 163 R&D Systems). Intra-assay and inter-assay precision for sE-selectin was 4.7-5.0% and 5.7-8.8%,  
45  
46 164 respectively. Fibrinogen was measured using the BNII nephelometer (N Antiserum to Human  
47  
48 165 Fibrinogen; Dade Behring Inc., Deerfield, IL). Intra-assay and inter-assay precision for  
49  
50 166 fibrinogen was 2.7% and 2.6%, respectively. CRP was analyzed using a BNII nephelometer  
51  
52  
53  
54  
55  
56  
57  
58  
59  
60

1  
2  
3 167 with a particle enhanced immunonephelometric assay. Intra-assay and inter-assay precision for  
4  
5 168 CRP was 2.3-4.4% and 2.1-5.7%, respectively.  
6  
7

8 169 **Statistical Analyses.** All variables were assessed for normality and non-normal data  
9  
10 170 were log transformed, which included data for CRP, IL-6, IL-6sr, fibrinogen, sE-selectin and  
11  
12 171 sICAM-1. General Linear Models were performed to determine the relationship of MMW and  
13  
14 172 BMI with the inflammatory markers. For each outcome, the ordinal MMW and BMI factors  
15  
16 173 were entered as independent factors with an interaction term. If the interaction term was not  
17  
18 174 significant, the interaction term was dropped and the model was re-fit for main effects only.  
19  
20 175 Pairwise comparisons were assessed using post hoc univariate analyses with a Bonferroni  
21  
22 176 adjustment for multiple comparisons. Covariates for all models included factors that are known  
23  
24 177 to affect inflammatory status: age, sex, smoking and relevant medications (cholesterol-lowering,  
25  
26 178 corticosteroids, anti-diabetic, antidepressant, hormone replacement and hormonal contraceptive).  
27  
28 179 Race was initially included as a covariate; however, approximately 200 data points were lost in  
29  
30 180 the analyses due to incomplete racial data. As race was not found to be a predictor of our  
31  
32 181 dependent variables, with the exception of sICAM-1, race was excluded as a covariate to  
33  
34 182 increase samples size in all analyses excluding sICAM-1. All statistical analyses were  
35  
36 183 performed with SPSS v. 17 (Chicago, IL) and statistical significance was set  $\alpha = 0.05$ .  
37  
38  
39  
40  
41  
42  
43

44 184 In an exploratory analysis, we examined whether the relative effects of BMI and MMW  
45  
46 185 on the inflammatory markers differed by sex in 3-way interaction models. As none of the  
47  
48 186 interactions approached statistical significance (data not shown), sex was retained as a covariate  
49  
50 187 in the models.  
51

52  
53 188  
54  
55 189  
56  
57  
58  
59  
60

## 190 RESULTS

191 **Subject Characteristics.** Table 1 presents anthropometric characteristics and circulating  
192 levels of inflammatory biomarkers in all subjects (N=1254). Subjects were 92.6% non-Hispanic  
193 white, 56.8% female, and, on average, middle-aged and overweight. Of all the respondents,  
194 14.9% were currently smoked, 27.8% were taking cholesterol lowering medication, 12.1%  
195 corticosteroids, 10.4% anti-diabetic medication, 14.2% antidepressant medication, 7.3%  
196 hormone replacement and 2.5% oral contraceptives. The percentage of participants with missing  
197 data for each variable were as follows: 1.6% for CRP, 1.0% for sICAM-1, 1.0% for IL-6, 1.6%  
198 for fibrinogen, 1.2% for sE-selectin, and 1.0% for IL-6sr.

199 **CRP (Figure 1, Panel A).** We found a significant interaction between BMI and MMW  
200 for CRP concentration ( $F=3.022$ ,  $P=0.006$ ). In post hoc comparisons, CRP levels were higher in  
201 overweight and obese subjects compared to normal weight subjects among those who reported  
202 no regular exercise ( $P's < 0.001$ ). However, among subjects who reported any amount of regular  
203 exercise ( $< 500$ ,  $500-1000$  or  $> 1000$  MMW), CRP levels were significantly greater only in obese  
204 subjects compared to both normal weight and overweight subjects ( $P's < 0.01$ ). In obese  
205 individuals, CRP tended to be lower in those reporting  $> 1000$  MMW compared to those  
206 reporting no regular exercise ( $P=0.053$ ).

207 We also found main effects of BMI ( $F=130.873$   $P < 0.001$ ) and MMW ( $F=11.576$ ,  
208  $P < 0.001$ ) on CRP. CRP was significantly greater with each increasing BMI category, in a dose-  
209 dependent manner ( $P's < 0.001$ ). Compared to participants who reported no regular exercise,  
210 CRP was significantly lower in those who reported  $500-1000$  and  $> 1000$  MMW ( $P's < 0.01$ ),  
211 with a trend for lower CRP in those who reported  $< 500$  MMW of regular exercise ( $P=0.078$ ).

1  
2  
3 212 **sICAM-1 (Figure 1, Panel B).** We found a significant interaction between BMI and  
4  
5 213 MMW for sICAM-1 concentration ( $F=2.701$ ,  $P=0.013$ ). Levels of sICAM-1 were significantly  
6  
7 214 lower in obese subjects who reported  $>1000$  MMW compared to obese subjects who reported no  
8  
9 215 regular exercise ( $P=0.014$ ) and  $<500$  MMW ( $P=0.026$ ) and tended to be lower than levels in  
10  
11 216 obese subjects who reported 500-1000 MMW ( $P=0.079$ ). No differences in sICAM-1 by MMW  
12  
13 217 were observed among normal weight or overweight individuals.  
14  
15

16  
17 218 We also observed a main effect of BMI ( $F=6.060$ ,  $P=0.002$ ), such that sICAM-1 levels in  
18  
19 219 obese participants were significantly higher than levels found in both normal weight and  
20  
21 220 overweight participants ( $P's<0.01$ ). No significant main effect of MMW was found for sICAM-1  
22  
23 221 ( $F=0.931$ ,  $P=0.425$ ).  
24  
25

26  
27 222 **IL-6 (Figure 1, Panel C).** Both BMI and MMW had independent effects on circulating  
28  
29 223 concentrations of IL-6 (BMI:  $F=60.150$ ,  $P<0.001$ , MMW:  $F=10.680$ ,  $P<0.001$ ), with no  
30  
31 224 significant interaction ( $F=1.21$ ,  $P=0.297$ ). We found a dose-dependent effect of BMI, such that  
32  
33 225 higher BMI levels were associated with significantly greater IL-6 ( $P's<0.001$ ). Independent of  
34  
35 226 BMI, IL-6 was significantly lower in subjects who reported regular exercise ( $<500$  MMW, 500-  
36  
37 227 1000 MMW and  $>1000$  MMW) compared to those who reported no regular exercise ( $P's <0.01$ )  
38  
39 228 with no difference between levels of MMW.  
40  
41  
42

43 229 **Fibrinogen (Figure 1, Panel D).** BMI significantly contributed to circulating levels of  
44  
45 230 fibrinogen ( $F=42.385$ ,  $P<0.001$ ), such that dose-dependent increases were observed for all BMI  
46  
47 231 levels ( $P's<0.01$ ). While we observed a trend for lower fibrinogen with regular physical activity,  
48  
49 232 similar to that of IL-6, the effect did not reach statistical significance ( $F=2.187$ ,  $P=0.088$ ). We  
50  
51 233 observed no significant interaction between BMI and MMW for fibrinogen ( $F=1.680$ ,  $P=0.122$ ).  
52  
53  
54  
55  
56  
57  
58  
59  
60



1  
2  
3 234 **sE-Selectin ( 1, Panel E).** BMI significantly contributed to circulating levels of sE-  
4  
5 235 selectin (F=28.253, P<0.001) with no significant contribution by MMW (F=0.207, P=0.892).  
6  
7  
8 236 Dose-dependent increases in sE-selectin were also observed across BMI levels (P's<0.01). We  
9  
10 237 observed no significant interaction between BMI and MMW for sE-selectin (F=0.570, P=0.755).

11  
12 238 **IL-6sr (Figure 1, Panel F).** No significant main effects for BMI (F=1.783, P=0.169),  
13  
14  
15 239 MMW (F=1.434, P=0.231) or their interaction (F=0.834, P=0.544) were detected for IL-6sr.  
16

17 240 **Waist Circumference (WC) and Inflammatory Markers (Supplemental Figure 1).** A  
18  
19  
20 241 secondary analysis was completed using WC and MMW as independent variables and the  
21  
22 242 complete results of these analyses are located in the supplemental information. Briefly, we  
23  
24 243 found a significant interaction between WC and MMW on sICAM-1. In individuals with an at-  
25  
26 244 risk WC ( $\geq 102.0$  cm for men and  $\geq 88.0$  cm for women), sICAM-1 was significantly lower in  
27  
28  
29 245 those reporting 1000+ MMW compared to less than 500 MMW and tended to be lower in those  
30  
31 246 reporting no regular exercise. Overall, main effects were similar to those found for BMI and  
32  
33 247 MMW analyses. Having an at-risk WC was independently related to higher levels of CRP,  
34  
35 248 sICAM-1, IL-6, fibrinogen and sE-selectin. Independent of WC, any level of regular exercise  
36  
37 249 was related to lower levels of CRP, IL-6 with a similar tendency for fibrinogen.  
38  
39  
40

41 250

## 42 43 251 **DISCUSSION**

44  
45 252 The current study aimed to determine whether the impact of BMI and MMW on  
46  
47 253 inflammatory markers varied by level of overweight or obesity. For CRP and s-ICAM-1  
48  
49 254 regular physical activity appeared to diminish the effects of higher BMI compared to those who  
50  
51 255 reported no regular physical activity. In addition, we found that BMI was strongly and  
52  
53 256 independently related to greater concentrations of both established and emerging inflammatory  
54  
55  
56  
57  
58  
59  
60

1  
2  
3 257 markers that may increase CVD risk. Independent of BMI, regular physical activity was also  
4  
5 258 associated with lower IL-6, with a similar trend for fibrinogen. These results suggest that,  
6  
7  
8 259 although obesity has a clear impact on inflammation, physical activity appears to mitigate at least  
9  
10 260 some of this effect.

11  
12  
13 261 For example, overweight individuals had CRP levels that were similar to levels observed  
14  
15 262 in obese individuals if they reported no regular exercise (4.05 and 4.83  $\mu\text{g/mL}$ , respectively).  
16  
17  
18 263 CRP levels greater than 3  $\mu\text{g/mL}$  are typically associated with high CVD risk(26). In overweight  
19  
20 264 subjects who reported regular physical activity of at least 3, 20-minute sessions per week (be it  
21  
22 265 below [ $<500$ ], within [ $500-1000$ ] or above [ $>1000$ ] USDHHS MMW recommendations), CRP  
23  
24  
25 266 levels were lower and not significantly different from CRP levels found in normal weight  
26  
27 267 participants (). This suggests that increasing physical activity level to a minimum of 3 days per  
28  
29  
30 268 week, at least 20 minutes per day, may improve CRP profiles among overweight individuals.

31  
32 269 Obese individuals may require a higher level of regular physical activity in order to lower  
33  
34 270 inflammatory markers. While obese subjects also had greater levels of CRP and sICAM-1  
35  
36  
37 271 compared to lean and overweight subjects, those who reported  $>1000$  MMW (above the  
38  
39 272 USDHHS recommendation) had lower levels of sICAM-1 and tended to have lower CRP than  
40  
41 273 obese subjects reporting no regular physical activity. Taken together, we may speculate that  
42  
43  
44 274 while physical activity levels currently recommended for the general population may reduce  
45  
46 275 particular inflammatory makers in overweight populations, obese populations may require  
47  
48  
49 276 greater levels of physical activity above recommended values to reduce inflammatory markers  
50  
51 277 like CRP and sICAM-1.

52  
53 278 As expected, strong main effects of BMI were observed for CRP, IL-6, fibrinogen,  
54  
55  
56 279 sICAM-1 and sE-selectin, in agreement with previous work (27-30). Independent of BMI effects,  
57  
58  
59  
60

1  
2  
3 280 our results suggest that physical activity has differentiating effects on inflammatory markers.  
4  
5  
6 281 Individuals reporting no regular physical activity had higher levels of IL-6 with a tendency for  
7  
8 282 higher fibrinogen, compared to those reporting any level of regular physical activity (<500, 500-  
9  
10 283 1000 or >1000 MMW). Similar results have been observed in the MONItoring trends and  
11  
12 284 determinants in CARDiovascular disease (MONICA) study(31), the National Health and Nutrition  
13  
14 285 Examination Survey (NHANES III)(12, 14) and the Multi-Ethnic Study of Atherosclerosis  
15  
16 286 (MESA)(32), such that both increased frequency and intensity of physical activity have been  
17  
18 287 related to lower IL-6 and fibrinogen. Our findings add to these prior results by standardizing  
19  
20 288 levels of physical activity by using USDHHS. Our results suggest that, regular physical activity  
21  
22 289 at any level (<500, 500-1000, >1000) appears to be associated with lower levels of IL-6 and  
23  
24 290 possibly fibrinogen, independent of BMI.  
25  
26  
27  
28

29 291 Although IL-6 produced in hypertrophied adipose tissue(33, 34) initiates the acute phase  
30  
31 292 response, marked by the release of hepatic CRP (35, 36), an interaction between BMI and  
32  
33 293 physical activity was detected for CRP, but not IL-6. While IL-6 and CRP were significantly  
34  
35 294 correlated ( $r=0.514$ , see Supplemental Table 1), this correlation suggests that IL-6 levels do not  
36  
37 295 fully explain CRP levels at any given moment. Further, CRP is a more stable biomarker, owing  
38  
39 296 to its substantially longer plasma half-life (37), which may improve our ability to detect  
40  
41 297 interaction effects in CRP compared to IL-6.  
42  
43  
44  
45

46 298 Interestingly, our results also suggest that regular exercise may have a more profound  
47  
48 299 impact on lowering classical markers of inflammation and less impact on the inflammatory status  
49  
50 300 of the endothelium. Regular physical activity has reliably been associated with lower levels of  
51  
52 301 IL-6 and CRP, both classical inflammatory markers related to adipose and systemic  
53  
54 302 inflammation(38). However, regular exercise appeared to have no independent impact on  
55  
56  
57  
58  
59  
60

1  
2  
3 303 markers of endothelial activation, particularly sE-selectin. Higher levels of exercise were related  
4  
5 304 to lower sICAM-1 in obese individuals only. In one prior study, inverse relationships between  
6  
7  
8 305 physical activity and sICAM-1 and sE-selectin were reported in drug-treated hypertensive men  
9  
10 306 (39). Thus, further research is necessary to understand mechanisms underlying differential  
11  
12 307 associations of exercise with systemic and endothelial inflammation.

13  
14  
15 308 Several limitations must be addressed. First, the cross-sectional design does not allow us  
16  
17 309 to infer causal relationships. Prospective and interventional designs are necessary to confirm our  
18  
19 310 findings. No objective measures of physical activity were available in the MIDUS sample.  
20  
21 311 Therefore, the use of self-report physical activity data may have diminished our ability to detect  
22  
23 312 effects. However, in addition to being in line with previous studies using self-report physical  
24  
25 313 activity, our findings are also in line with previous studies(40, 41) that demonstrated that higher  
26  
27 314 cardiorespiratory fitness, as measured by indirect calorimetry, was associated with lower levels  
28  
29 315 of inflammation independent of visceral adiposity or BMI. Another limitation is that the sample  
30  
31 316 was predominantly comprised of non-Hispanic white individuals, suggesting that findings may  
32  
33 317 not extend to all ethnicities. Finally, BMI and physical activity variables are correlated,  
34  
35 318 potentially raising the concern of small sample sizes in specific groups crossed by BMI and  
36  
37 319 MMW. However, the smallest group for analyses still contained 54 individuals (normal weight  
38  
39 320 individuals reporting no exercise).

40  
41 321 In summary, our results demonstrate both interactive and independent influences of BMI  
42  
43 322 and levels of physical activity on both established and emerging markers of inflammation.  
44  
45 323 Inflammation is both a consequence of obesity and a mechanism promoting CVD. Regular  
46  
47 324 physical activity appears to mitigate the effects of higher BMI on some inflammatory markers,  
48  
49 325 particularly CRP, which is strongly implicated in CVD. Importantly, while any level of regular  
50  
51  
52  
53  
54  
55  
56  
57  
58  
59  
60

1  
2  
3  
4  
5  
6  
7  
8  
9  
10  
11  
12  
13  
14  
15  
16  
17  
18  
19  
20  
21  
22  
23  
24  
25  
26  
27  
28  
29  
30  
31  
32  
33  
34  
35  
36  
37  
38  
39  
40  
41  
42  
43  
44  
45  
46  
47  
48  
49  
50  
51  
52  
53  
54  
55  
56  
57  
58  
59  
60

326 physical activity may help reduce inflammation in overweight individuals, similar effects in  
327 obese individuals may require levels of physical activity that are greater than currently  
328 recommended by the USDHHS for general health.

329

330

331

332

333

334

335

336

337

338

339

340

341

342

343

344

345

346

347

348

For peer review only

1  
2  
3 349 **ACKNOWLEDGEMENTS**  
4

5 350 We thank the staff of the Clinical Research Centers at the University of Wisconsin-Madison,  
6  
7  
8 351 UCLA, and Georgetown University for their effort in conducting the original data collection.  
9

10 352

11  
12  
13 353 **FUNDING**  
14

15 354 KS was supported through a T32 Training Fellowship (Training in Behavioral and Preventive  
16  
17 355 Medicine; T32 HL076134). The original research was supported by a grant from the National  
18  
19  
20 356 Institute on Aging (P01-AG020166) to conduct a longitudinal follow-up of the MIDUS (Midlife  
21  
22 357 in the U.S.) Investigation.  
23

24 358

25  
26  
27 359 The original study was supported by the John D. and Catherine T. MacArther Foundation  
28  
29 360 Research Network on Successful Midlife Development and by the following grants: M01-  
30  
31 361 RR023942 (Georgetown), M01-RR00865 (UCLA) from the General Clinical Research Centers  
32  
33 362 Program and 1UL1RR025011 (UW) from the Clinical and Translational Science Award (CTSA)  
34  
35 363 program of the National Center for Research Resources, National Institutes of Health.  
36  
37  
38

39 364

40  
41 365 **CONFLICTS OF INTEREST**  
42

43 366 The authors declare no conflict of interest.  
44  
45

46 367

47  
48 368 **CONTRIBUTORSHIP**  
49

50 369 KS, JMM and RRW each made substantial contributions to the conception and design of the  
51  
52 370 study, data acquisition, analysis and interpretation, as well as to drafting and revision for  
53  
54  
55 371 substantial intellectual content. All authors made final approval of the version to be published.  
56  
57  
58  
59  
60

1  
2  
3 372  
4  
5  
6 373 **DATA SHARING STATEMENT**  
7  
8 374 Data and documentation for MIDUS studies are available at the Inter-university Consortium for  
9  
10 375 Political and Social Research (ICPSR). <http://www.icpsr.umich.edu/icpsrweb/landing.jsp>  
11  
12  
13 376  
14  
15 377

## ARTICLE SUMMARY

### Article focus

- Systemic inflammation is related to the progression of cardiovascular disease.
- Independent of obesity, physical activity is inversely related to concentrations of well-established inflammatory biomarkers, such as C-reactive protein (CRP) or interleukin-6 (IL-6).
- This article evaluates interactive effects of body mass index and physical activity on established inflammatory markers, CRP, IL-6, and emerging inflammatory markers, fibrinogen, soluble intracellular adhesion molecule (sICAM)-1, soluble E-selectin, and IL-6 soluble receptor.

### Key messages

- Interactive effects of body mass index and physical activity were observed for CRP, such that regular physical activity reported by overweight individuals was related to significantly lower CRP levels compared to those reported no regular activity.
- Independent of BMI, regular physical activity was related to lower IL-6, with a trend for lower fibrinogen
- Physical activity had no independent effect on circulating markers related to endothelial inflammation, such as sICAM-1 or sE-selectin.

### Strengths and limitations

- 1254 adults from the National Survey of Midlife Development in the United States (MIDUS) Biomarker Project were analyzed. Statistical analyses were adjusted for age, sex, smoking, and relevant medication use. A strength of this paper is categorizing physical activity levels based on national recommendations. This data may be used to determine appropriate levels of physical activity necessary for reducing inflammation in overweight and obese adults. However, cross-sectional data is limited, as causal inferences cannot be obtained. A second limitation is that the sample was predominantly comprised of non-Hispanic white individuals, therefore findings may not extend to all ethnicities.

395 **REFERENCES**

- 396 1. Blair SN, Brodney S. Effects of physical inactivity and obesity on morbidity and  
397 mortality: current evidence and research issues. *Med Sci Sports Exerc.* 1999;31(11 Suppl):S646-  
398 62. Epub 1999/12/11.
- 399 2. Hotamisligil GS. Inflammation and metabolic disorders. *Nature.* 2006;444(7121):860-7.  
400 Epub 2006/12/15.
- 401 3. Koenig W, Khuseyinova N, Baumert J, et al. Increased concentrations of C-reactive  
402 protein and IL-6 but not IL-18 are independently associated with incident coronary events in  
403 middle-aged men and women: results from the MONICA/KORA Augsburg case-cohort study,  
404 1984-2002. *Arterioscler Thromb Vasc Biol.* 2006;26(12):2745-51. Epub 2006/09/30.
- 405 4. Papageorgiou N, Tousoulis D, Siasos G, et al. Is fibrinogen a marker of inflammation in  
406 coronary artery disease? *Hellenic J Cardiol.* 2010;51(1):1-9. Epub 2010/02/02.
- 407 5. Schmidt C, Hulthe J, Fagerberg B. Baseline ICAM-1 and VCAM-1 are increased in  
408 initially healthy middle-aged men who develop cardiovascular disease during 6.6 years of  
409 follow-up. *Angiology.* 2009;60(1):108-14. Epub 2008/05/28.
- 410 6. Demerath E, Towne B, Blangero J, et al. The relationship of soluble ICAM-1, VCAM-1,  
411 P-selectin and E-selectin to cardiovascular disease risk factors in healthy men and women. *Ann*  
412 *Hum Biol.* 2001;28(6):664-78. Epub 2001/12/01.
- 413 7. Rocha VZ, Libby P. Obesity, inflammation, and atherosclerosis. *Nat Rev Cardiol.*  
414 2009;6(6):399-409. Epub 2009/04/29.
- 415 8. Calabro P, Yeh ET. Obesity, inflammation, and vascular disease: the role of the adipose  
416 tissue as an endocrine organ. *Subcell Biochem.* 2007;42:63-91. Epub 2007/07/07.



- 1  
2  
3 417 9. Pou KM, Massaro JM, Hoffmann U, et al. Visceral and subcutaneous adipose tissue  
4  
5 418 volumes are cross-sectionally related to markers of inflammation and oxidative stress: the  
6  
7 419 Framingham Heart Study. *Circulation*. 2007;116(11):1234-41. Epub 2007/08/22.
- 8  
9  
10 420 10. Mathieu P, Poirier P, Pibarot P, et al. Visceral obesity: the link among inflammation,  
11  
12 421 hypertension, and cardiovascular disease. *Hypertension*. 2009;53(4):577-84. Epub 2009/02/25.
- 13  
14  
15 422 11. Reuben DB, Judd-Hamilton L, Harris TB, et al. The associations between physical  
16  
17 423 activity and inflammatory markers in high-functioning older persons: MacArthur Studies of  
18  
19 424 Successful Aging. *J Am Geriatr Soc*. 2003;51(8):1125-30. Epub 2003/08/02.
- 20  
21  
22 425 12. King DE, Carek P, Mainous AG, 3rd, et al. Inflammatory markers and exercise:  
23  
24 426 differences related to exercise type. *Med Sci Sports Exerc*. 2003;35(4):575-81. Epub 2003/04/04.
- 25  
26  
27 427 13. Wannamethee SG, Lowe GD, Whincup PH, et al. Physical activity and hemostatic and  
28  
29 428 inflammatory variables in elderly men. *Circulation*. 2002;105(15):1785-90. Epub 2002/04/17.
- 30  
31  
32 429 14. Abramson JL, Vaccarino V. Relationship between physical activity and inflammation  
33  
34 430 among apparently healthy middle-aged and older US adults. *Arch Intern Med*.  
35  
36 431 2002;162(11):1286-92. Epub 2002/06/01.
- 37  
38  
39 432 15. Geffken DF, Cushman M, Burke GL, et al. Association between physical activity and  
40  
41 433 markers of inflammation in a healthy elderly population. *Am J Epidemiol*. 2001;153(3):242-50.  
42  
43 434 Epub 2001/02/07.
- 44  
45  
46 435 16. Taaffe DR, Harris TB, Ferrucci L, et al. Cross-sectional and prospective relationships of  
47  
48 436 interleukin-6 and C-reactive protein with physical performance in elderly persons: MacArthur  
49  
50 437 studies of successful aging. *J Gerontol A Biol Sci Med Sci*. 2000;55(12):M709-15. Epub  
51  
52 438 2000/12/29.
- 53  
54  
55  
56  
57  
58  
59  
60

- 1  
2  
3 439 17. Starkie R, Ostrowski SR, Jauffred S, et al. Exercise and IL-6 infusion inhibit endotoxin-  
4  
5 440 induced TNF-alpha production in humans. FASEB J. 2003;17(8):884-6. Epub 2003/03/11.  
6  
7  
8 441 18. Pedersen BK, Steensberg A, Fischer C, et al. Exercise and cytokines with particular focus  
9  
10 442 on muscle-derived IL-6. Exerc Immunol Rev. 2001;7:18-31. Epub 2001/10/03.  
11  
12  
13 443 19. Pedersen BK, Steensberg A, Fischer C, et al. The metabolic role of IL-6 produced during  
14  
15 444 exercise: is IL-6 an exercise factor? Proc Nutr Soc. 2004;63(2):263-7. Epub 2004/08/06.  
16  
17  
18 445 20. Trayhurn P, Wood IS. Adipokines: inflammation and the pleiotropic role of white  
19  
20 446 adipose tissue. Br J Nutr. 2004;92(3):347-55. Epub 2004/10/08.  
21  
22  
23 447 21. Beavers KM, Brinkley TE, Nicklas BJ. Effect of exercise training on chronic  
24  
25 448 inflammation. Clin Chim Acta. 2010;411(11-12):785-93. Epub 2010/03/02.  
26  
27  
28 449 22. USDHHS, editor. 2008 Physical Activity Guidelines for Americans. Washington  
29  
30 450 DC2008.  
31  
32 451 23. C Ryff DA, JS Ayanian, DS carr, PD Cleary, C Coe, R Davidson, RF Krueger, ME  
33  
34 452 Lachman, NF Marks, DK Mroczek, T Seeman, MM Seltzer, BH Singer, RP Sloan, PA Tun, M  
35  
36 453 Weinstein, D Williams. National Survey of Midlife Development in the United State (MIDUS II),  
37  
38 454 2004-2006. Inter-university Consortium for Political and Social Research (ICPSR) [distributor].  
39  
40 455 2011.  
41  
42  
43 456 24. Kraemer H. How Many Subjects? Statistical Power Analysis in Research: SAGE  
44  
45 457 Publications, Inc; 1987.  
46  
47  
48 458 25. Cohen J. Statistical Power Analysis for the Behavioral Sciences. Second ed: Lawrence  
49  
50 459 Erlbaum Associates; 1998.  
51  
52  
53 460 26. Bassuk SS, Rifai N, Ridker PM. High-sensitivity C-reactive protein: clinical importance.  
54  
55 461 Curr Probl Cardiol. 2004;29(8):439-93. Epub 2004/07/20.  
56  
57  
58  
59  
60

- 1  
2  
3 462 27. Park HS, Park JY, Yu R. Relationship of obesity and visceral adiposity with serum  
4  
5 463 concentrations of CRP, TNF-alpha and IL-6. *Diabetes Res Clin Pract.* 2005;69(1):29-35. Epub  
6  
7 464 2005/06/16.
- 8  
9  
10 465 28. Bastard JP, Jardel C, Bruckert E, et al. Elevated levels of interleukin 6 are reduced in  
11  
12 466 serum and subcutaneous adipose tissue of obese women after weight loss. *J Clin Endocrinol*  
13  
14 467 *Metab.* 2000;85(9):3338-42. Epub 2000/09/22.
- 15  
16  
17 468 29. Ditschuneit HH, Flechtner-Mors M, Adler G. Fibrinogen in obesity before and after  
18  
19 469 weight reduction. *Obes Res.* 1995;3(1):43-8. Epub 1995/01/01.
- 20  
21  
22 470 30. Straczkowski M, Lewczuk P, Dzienis-Straczkowska S, et al. Elevated soluble  
23  
24 471 intercellular adhesion molecule-1 levels in obesity: relationship to insulin resistance and tumor  
25  
26 472 necrosis factor-alpha system activity. *Metabolism.* 2002;51(1):75-8. Epub 2002/01/10.
- 27  
28  
29 473 31. Autenrieth C, Schneider A, Doring A, et al. Association between different domains of  
30  
31 474 physical activity and markers of inflammation. *Med Sci Sports Exerc.* 2009;41(9):1706-13. Epub  
32  
33 475 2009/08/07.
- 34  
35  
36 476 32. Majka DS, Chang RW, Vu TH, et al. Physical activity and high-sensitivity C-reactive  
37  
38 477 protein: the multi-ethnic study of atherosclerosis. *Am J Prev Med.* 2009;36(1):56-62. Epub  
39  
40 478 2008/11/18.
- 41  
42  
43 479 33. Day CP. From fat to inflammation. *Gastroenterology.* 2006;130(1):207-10. Epub  
44  
45 480 2006/01/13.
- 46  
47  
48 481 34. Fain JN, Madan AK, Hiler ML, et al. Comparison of the release of adipokines by adipose  
49  
50 482 tissue, adipose tissue matrix, and adipocytes from visceral and subcutaneous abdominal adipose  
51  
52 483 tissues of obese humans. *Endocrinology.* 2004;145(5):2273-82. Epub 2004/01/17.
- 53  
54  
55  
56  
57  
58  
59  
60

- 1  
2  
3 484 35. Castell JV, Gomez-Lechon MJ, David M, et al. Interleukin-6 is the major regulator of  
4  
5 485 acute phase protein synthesis in adult human hepatocytes. *FEBS Lett.* 1989;242(2):237-9. Epub  
6  
7 486 1989/01/02.  
8  
9  
10 487 36. Heinrich PC, Castell JV, Andus T. Interleukin-6 and the acute phase response. *Biochem J.*  
11  
12 488 1990;265(3):621-36. Epub 1990/02/01.  
13  
14  
15 489 37. Pradhan AD, Manson JE, Rifai N, et al. C-reactive protein, interleukin 6, and risk of  
16  
17 490 developing type 2 diabetes mellitus. *JAMA.* 2001;286(3):327-34. Epub 2001/07/24.  
18  
19  
20 491 38. Mathieu P, Lemieux I, Despres JP. Obesity, inflammation, and cardiovascular risk. *Clin*  
21  
22 492 *Pharmacol Ther.* 2010;87(4):407-16. Epub 2010/03/05.  
23  
24  
25 493 39. Hjelstuen A, Anderssen SA, Holme I, et al. Markers of inflammation are inversely related  
26  
27 494 to physical activity and fitness in sedentary men with treated hypertension. *Am J Hypertens.*  
28  
29 495 2006;19(7):669-75; discussion 76-7. Epub 2006/07/04.  
30  
31  
32 496 40. Church TS, Barlow CE, Earnest CP, et al. Associations between cardiorespiratory fitness  
33  
34 497 and C-reactive protein in men. *Arterioscler Thromb Vasc Biol.* 2002;22(11):1869-76. Epub  
35  
36 498 2002/11/12.  
37  
38  
39 499 41. Arsenault BJ, Cartier A, Cote M, et al. Body composition, cardiorespiratory fitness, and  
40  
41 500 low-grade inflammation in middle-aged men and women. *Am J Cardiol.* 2009;104(2):240-6.  
42  
43 501 Epub 2009/07/07.  
44  
45  
46 502  
47  
48 503  
49  
50 504  
51  
52 505  
53  
54  
55 506  
56  
57  
58  
59  
60

1  
2  
3 507 **FIGURE AND TABLE LEGENDS**  
4

5  
6 508  
7  
8 509  
9  
10 510 **Figure 1: Inflammatory Markers.** Data from 1254 men and women in MIDUS. Joint  
11  
12 511 association of BMI category (normal, overweight and obese) and MMW category (no regular  
13  
14 512 exercise, <500 MMW, 500-1000 MMW and >1000 MMW) for CRP (A), sICAM-1 (B), IL-6 (C),  
15  
16 513 fibrinogen (D), sE-Selectin (E) and IL-6sr (F). These analyses were adjusted for age, sex,  
17  
18 514 smoking and relevant medication use. The analysis for sICAM-1 was further adjusted for race.  
19  
20 515 Error bars represent SEM. BMI=BMI main effect P value, MMW=MMW main effect P value,  
21  
22 516 INT=interaction effect P value.  
23  
24  
25  
26

27 517

28  
29 518  
30

31 519 **Table 1: Subject Characteristics.** BMI = body mass index; CRP = C-reactive protein; IL =  
32  
33 520 interleukin; IL-6sr = IL-6 soluble receptor; MMW = MET-Minutes per Week; sE-Selectin =  
34  
35 521 soluble E-Selectin; sICAM-1= soluble intracellular adhesion molecule-1.  
36  
37  
38

39 522  
40  
41  
42  
43  
44  
45  
46  
47  
48  
49  
50  
51  
52  
53  
54  
55  
56  
57  
58  
59  
60

1  
2  
3 1 **Contributions of Body Mass Index and Exercise Habits on Inflammatory Markers: A**  
4 2 **Cohort Study of Middle Aged Adults Living in the United States**  
5 3  
6 4  
7 5  
8 6

9 Kelley Strohacker, Ph.D.<sup>a</sup>, Rena R. Wing, Ph.D.<sup>a</sup>, and Jeanne M. McCaffery, Ph.D.<sup>a</sup>  
10 7  
11 8  
12 9

13 10 <sup>a</sup>The Miriam Hospital and the Warren Alpert Medical School of Brown University, Providence  
14 11 RI  
15 12  
16 13  
17 14

18  
19  
20  
21 15 Corresponding Author  
22 16

23 17 Jeanne M. McCaffery, Ph.D.  
24 18

25 19 Associate Professor of Psychiatry and Human Behavior (Research)  
26 20  
27 21

28 22 The Miriam Hospital Weight Control and Diabetes Research Center  
29 23

30 24 196 Richmond Street  
31 25

32 26 Providence, RI 02904  
33 27

34 28 Phone: (401) 793-8010  
35 29

36 30 Fax: (401) 793-8944  
37 31

38 32 Email: JMccaffery@lifespan.org  
39 33  
40 34  
41 35  
42 36  
43 37  
44 38  
45 39  
46 40  
47 41  
48 42  
49 43  
50 44  
51 45  
52 46  
53 47  
54 48  
55 49  
56 50  
57 51  
58 52  
59 53  
60 54

56 26 Running Title:

57 27 BMI, Physical Activity and Inflammation  
58 28  
59 29  
60 30

54 29 **Key Words:** MIDUS, Intracellular Adhesion Molecule-1, Fibrinogen, C-Reactive Protein

56 30 **Word Count: 3331**

31 **ABSTRACT**

32 **Objectives.** Determine whether body mass index (BMI) and physical activity (PA) above, at or  
33 below MET-minute per week (MMW) levels recommended in the 2008 Physical Activity  
34 Guidelines interact or have additive effects on interleukin (IL)-6, C-reactive protein (CRP),  
35 fibrinogen, IL-6 soluble receptor (IL-6sr), soluble E-selectin and soluble intracellular adhesion  
36 molecule (sICAM)-1. **Design.** Archived cohort data (N=1254, age 54.5±11.7y, BMI  
37 29.8±6.6kg/m<sup>2</sup>) from the National Survey of Midlife Development in the United States (MIDUS)  
38 Biomarkers Study were analyzed for concentrations of inflammatory markers using general  
39 linear models. MMW was defined as no regular exercise, <500 MMW, 500-1000 MMW, >1000  
40 MMW and BMI was defined as <25, 25-29.9, ≥30 kg/m<sup>2</sup>. Analyses were adjusted for age, sex,  
41 smoking and relevant medication use. **Setting.** Respondents reported to three centers to  
42 complete questionnaires and provide blood samples. **Participants.** Participants were men and  
43 women currently enrolled in the MIDUS Biomarker Project (N=1254, 93% non-hispanic white,  
44 average age 54.5y). **Primary Outcome Measures.** Concentration of serum IL-6, CRP,  
45 fibrinogen, IL-6sr, sE-selectin and sICAM. **Results.** Significant interactions were found  
46 between BMI and MMW for CRP and sICAM-1 (P's<0.05). CRP in overweight individuals was  
47 similar to obese when no PA was reported, but was similar to normal weight when any level of  
48 regular PA was reported. sICAM-1 was differentially lower in obese individuals who reported  
49 >1000 MMW compared to obese individuals reporting less exercise. **Conclusion.** The  
50 association of exercise with CRP and sICAM-1 differed by BMI, suggesting that regular exercise  
51 may buffer weight-associated elevations in CRP in overweight individuals while higher levels of  
52 exercise may be necessary to reduce sICAM-1 or CRP in obese individuals. **Trial Registry.**  
53 N/A.

## 54 INTRODUCTION

55 Obesity paired with low physical activity is well known to increase morbidity and mortality  
56 related to cardiovascular disease (CVD)(1). It is less clear, however, whether the benefits of  
57 higher levels of physical activity differ among normal weight, overweight, and obese individuals.

58 Chronic, low-grade inflammation, marked by elevations in cytokines, acute phase  
59 reactants and soluble adhesion molecules, is a developing CVD risk factor(2, 3). Circulating  
60 Interleukin-6 (IL-6) and, C-reactive protein (CRP) are both considered established inflammatory  
61 markers related to CVD(3). Fibrinogen, soluble intracellular adhesion molecule (sICAM-1) and  
62 soluble e-selectin (sE-selectin) also have key roles in the progression of CVD and have been  
63 associated with elevated risk(4-6). Obesity is strongly associated with greater concentrations of  
64 inflammatory markers(7, 8). Further, body fat distribution is also an important factor relating to  
65 inflammatory status. Accumulation of fat in visceral depots is more strongly associated with  
66 low-grade inflammation compared to accumulation of fat in subcutaneous or hip-region depots(9,  
67 10).

68 The effects of physical activity on markers of inflammation are more complex and may  
69 vary depending on body weight. A number of epidemiological studies have shown an inverse  
70 relationship between physical activity and CRP and IL-6, independent of obesity(11-16).

71 Laboratory studies conducted in aerobically trained, typically normal weight, individuals have  
72 demonstrated that a single bout of exercise stimulates IL-6 release from skeletal muscle, which  
73 promotes anti-inflammatory effects (17-19), as opposed to adipose tissue-derived IL-6 that is  
74 associated with pro-inflammatory effects (20). Randomized controlled trials have also been  
75 conducted, often in populations that also tend to be overweight or obese, to examine the effects



1  
2  
3 76 of aerobic exercise interventions on inflammation and the results are mixed (21). Thus, the  
4  
5 77 contribution of physical activity to inflammation in the context of obesity remains unclear.  
6  
7

8 78 The purpose of our study was to disentangle the relative contributions of BMI and  
9  
10 79 physical activity recorded in MET-minutes per week (MMW) to circulating levels of IL-6, IL-6sr,  
11  
12 80 CRP, sICAM-1 and sE-selectin in middle-aged adults. MMW categories for this study were  
13  
14 81 determined using values put forth by the Physical Activity Guidelines for Americans, which  
15  
16 82 states that total weekly physical activity in the range of 500-1000 MET-minutes (approximately  
17  
18 83 equivalent to 150-300 minutes of moderate or 75-150 minutes of vigorous activity per week)  
19  
20 84 produces substantial health benefits for adults(22). We hypothesized that BMI and MMW would  
21  
22 85 interact, such that greater MMW reported would lessen the impact of obesity on markers of  
23  
24 86 inflammation.  
25  
26  
27  
28  
29  
30  
31

## 32 88 MATERIALS AND METHODS

33  
34 89 **Design and Sample.** This study was a cross-sectional analysis of archived data (BMI,  
35  
36 90 self-reported physical activity and inflammatory biomarker concentrations) from 1254  
37  
38 91 respondents who provided consent (as approved by The University of Wisconsin Madison Health  
39  
40 92 Sciences Institutional Review Board) and were subsequently enrolled in the National Survey of  
41  
42 93 Midlife Development in the United States (MIDUS) Biomarkers Study (23). The Biomarker  
43  
44 94 Project was one of 5 projects within MIDUS II, with the purpose of adding comprehensive  
45  
46 95 biological assessments on a subsample of the MIDUS participants to further understand age-  
47  
48 96 related differences in physical and mental health. Participants were eligible for The Biomarker  
49  
50 97 Project if they were previously enrolled in MIDUS I, which recruited non-institutionalized,  
51  
52 98 English-speaking adults residing in the contiguous United States aged 25-74. The random digit  
53  
54  
55  
56  
57  
58  
59  
60

1  
2  
3 99 dialing sample for the parent study was selected from working telephone banks and a list of all  
4  
5  
6 100 individuals between the ages of 25 and 74 years within each household was generated in order to  
7  
8 101 select a random respondent. Those who agreed to participate in the Biomarker Study stayed  
9  
10 102 overnight at one of three General Clinical Research Centers: University of California Los  
11  
12 103 Angeles, University of Wisconsin-Madison and Georgetown University. Upon arrival, each  
13  
14 104 respondent provided a detailed medical history (including physical activity levels) and provided  
15  
16 105 all prescription, over-the-counter, and alternative medications to be inventoried by project staff.  
17  
18 106 Following an overnight stay, morning fasting blood samples were obtained. Cohorts were  
19  
20 107 assessed between July 2004 and May 2009 as a follow up to MIDUS I respondents that were  
21  
22 108 previously surveyed by the MacArthur Midlife Research Network between 1995 and 1996.  
23  
24 109 Based on the sample of 1254 participants, 80% power was achieved to detect small effects of  
25  
26 110 0.08 or greater with alpha level at 0.05 for a two-tailed test(24, 25).

27  
28  
29 111 **Anthropometrics.** Height was measured in centimeters and recorded to the nearest  
30  
31 112 millimeter. A single measure of WC was taken directly on the skin or over a single layer of light,  
32  
33 113 close-fitting clothing at the narrowest point between ribs and the iliac crest in centimeters to the  
34  
35 114 nearest millimeter. Weight was measured in kilograms and BMI was calculated by dividing  
36  
37 115 body mass in kilograms by height in meters squared. BMI categories were organized into 3  
38  
39 116 groups: normal weight ( $BMI \leq 24.9 \text{ kg/m}^2$ ), overweight ( $BMI \geq 25-29.9$ ) and obese ( $BMI \geq 30$ ).

#### 117 **Categorizing Physical Activity by MET-Minutes per Week (MMW).**

118 The MMW variable was calculated using data provided in the medical history form. The  
119 form first described 3 types of regular physical activity(23):

120 ***Vigorous:** Which causes your heart to beat so rapidly you can feel it in your chest*  
121 *and you perform it long enough to work up a good sweat and breathe heavily (e.g.,*

1  
2  
3 122 *competitive sports, running, vigorous swimming, high intensity aerobics, digging*  
4  
5 123 *in the garden, or lifting heavy objects).*

7  
8 124 **Moderate:** *Which causes your heart rate to increase slightly and you typically*  
9  
10 125 *work up a sweat (e.g., leisurely sports like light tennis, slow or light swimming,*  
11  
12 126 *low intensity aerobics or golfing without a power cart, brisk walking, mowing the*  
13  
14 127 *lawn with a walking lawnmower).*

15  
16  
17 128 **Light:** *Which requires little physical effort (e.g., light housekeeping like dusting*  
18  
19 129 *or laundry, bowling, archery, easy walking, golfing with a power cart or fishing).*

20  
21  
22 130 Keeping these definitions in mind, participants were asked if they engaged in regular physical  
23  
24 131 activity of any type for 20 minutes or more at least 3 times per week (yes or no). If participants  
25  
26 132 answered “yes”, they entered up to 7 types of seasonal and/or non-seasonal exercise or activity  
27  
28 133 along with the frequency, duration and intensity.

29  
30  
31 134 MMW were calculated in a 2-step process. Step 1: subjects who reported no physical  
32  
33 135 activity (for whom no MMW calculations could be made) were designated as the no regular  
34  
35 136 exercise group (NRE). Step 2: For subjects who indicated that they performed regular physical  
36  
37 137 activity, total MMW were calculated by multiplying minutes per week by intensity level (1.1 for  
38  
39 138 low, 3.0 for moderate and 6.0 for vigorous) and summed across each non-seasonal activity  
40  
41 139 reported. Four groups reflecting participation in physical activity and whether or not their  
42  
43 140 participation was below, at or above USDHHS guidelines were created: NRE (reported no  
44  
45 141 regular physical activity), below recommended (reported <500 MMW), recommended (reported  
46  
47 142 500-1000 MMW) and above recommended (reported >1000 MMW).

48  
49  
50  
51 143 **Blood Collection, Processing and Assays.** Participants were asked to avoid strenuous  
52  
53 144 activity the day of blood collection. Venous blood samples were collected in 10 mL serum

1  
2  
3 145 separator vacutainers following a 12-h overnight fast and processed at a General Clinical  
4  
5 146 Research Center using standardized procedures. Blood samples were not collected at any  
6  
7  
8 147 specific point during the menstrual cycle in female participants. Briefly, following collection,  
9  
10 148 vacutainers were allowed to stand 15-30-min (2-h maximum) prior to centrifugation at 4°C for  
11  
12 149 20-min at 2000-3000 rpm. Serum samples were frozen and shipped to the MIDUS Biocore Lab  
13  
14 150 and treated and/or analyzed for inflammation markers (IL-6, IL-6sr, CRP, fibrinogen, sE-  
15  
16 151 Selectin and sICAM-1).

17  
18  
19  
20 152 IL-6 and IL-6sr were assayed in the MIDUS Biocore Laboratory (University of Madison,  
21  
22 153 Madison WI) using Quantikine® High-sensitivity ELISA kits (cat# HS600B and cat# DR600,  
23  
24 154 R&D Systems, Minneapolis, MN). Plates were read at 490 and 450 nm, respectively for IL-6  
25  
26 155 and IL-6sr using a Dynex MRXe plate reader (Magellan Biosciences, Chantilly, VA). Intra-  
27  
28 156 assay and inter-assay precision (CV%) for IL-6 was approximately 4.1% and 13.0%. CV%  
29  
30 157 values for IL-6sr were 5.9-5.7% and 2.0%, respectively.

31  
32  
33  
34 158 Assays for sICAM-1, sE-Selectin, fibrinogen and CRP were performed at the Laboratory  
35  
36 159 for Clinical Biochemistry Research (University of Vermont, Burlington, VT). Measurement of  
37  
38 160 sICAM-1 was completed using an ELISA assay (Parameter-Human sICAM-1 Immunoassay;  
39  
40 161 R&D Systems). Inter-assay precision for sICAM-1 was 5.0%. Measurement of sE-selectin was  
41  
42 162 completed using a high-sensitivity ELISA assay (Parameter Human sE-Selectin Immunoassay,  
43  
44 163 R&D Systems). Intra-assay and inter-assay precision for sE-selectin was 4.7-5.0% and 5.7-8.8%,  
45  
46 164 respectively. Fibrinogen was measured using the BNII nephelometer (N Antiserum to Human  
47  
48 165 Fibrinogen; Dade Behring Inc., Deerfield, IL). Intra-assay and inter-assay precision for  
49  
50 166 fibrinogen was 2.7% and 2.6%, respectively. CRP was analyzed using a BNII nephelometer  
51  
52  
53  
54  
55  
56  
57  
58  
59  
60

1  
2  
3 167 with a particle enhanced immunonephelometric assay. Intra-assay and inter-assay precision for  
4  
5 168 CRP was 2.3-4.4% and 2.1-5.7%, respectively.  
6  
7

8 169 **Statistical Analyses.** All variables were assessed for normality and non-normal data  
9  
10 170 were log transformed, which included data for CRP, IL-6, IL-6sr, fibrinogen, sE-selectin and  
11  
12 171 sICAM-1. General Linear Models were performed to determine the relationship of MMW and  
13  
14 172 BMI with the inflammatory markers. For each outcome, the ordinal MMW and BMI factors  
15  
16 173 were entered as independent factors with an interaction term. If the interaction term was not  
17  
18 174 significant, the interaction term was dropped and the model was re-fit for main effects only.  
19  
20 175 Pairwise comparisons were assessed using post hoc univariate analyses with a Bonferroni  
21  
22 176 adjustment for multiple comparisons. Covariates for all models included factors that are known  
23  
24 177 to affect inflammatory status: age, sex, smoking and relevant medications (cholesterol-lowering,  
25  
26 178 corticosteroids, anti-diabetic, antidepressant, hormone replacement and hormonal contraceptive).  
27  
28 179 Race was initially included as a covariate; however, approximately 200 data points were lost in  
29  
30 180 the analyses due to incomplete racial data. As race was not found to be a predictor of our  
31  
32 181 dependent variables, with the exception of sICAM-1, race was excluded as a covariate to  
33  
34 182 increase samples size in all analyses excluding sICAM-1. All statistical analyses were  
35  
36 183 performed with SPSS v. 17 (Chicago, IL) and statistical significance was set  $\alpha = 0.05$ .  
37  
38  
39  
40  
41  
42  
43

44 184 In an exploratory analysis, we examined whether the relative effects of BMI and MMW  
45  
46 185 on the inflammatory markers differed by sex in 3-way interaction models. As none of the  
47  
48 186 interactions approached statistical significance (data not shown), sex was retained as a covariate  
49  
50 187 in the models.  
51  
52

53 188

54  
55 189

## 190 RESULTS

191 **Subject Characteristics.** Table 1 presents anthropometric characteristics and circulating  
192 levels of inflammatory biomarkers in all subjects (N=1254). Subjects were 92.6% non-Hispanic  
193 white, 56.8% female, and, on average, middle-aged and overweight. Of all the respondents,  
194 14.9% were currently smoked, 27.8% were taking cholesterol lowering medication, 12.1%  
195 corticosteroids, 10.4% anti-diabetic medication, 14.2% antidepressant medication, 7.3%  
196 hormone replacement and 2.5% oral contraceptives. The percentage of participants with missing  
197 data for each variable were as follows: 1.6% for CRP, 1.0% for sICAM-1, 1.0% for IL-6, 1.6%  
198 for fibrinogen, 1.2% for sE-selectin, and 1.0% for IL-6sr.

199 **CRP (Figure 1, Panel A).** We found a significant interaction between BMI and MMW  
200 for CRP concentration ( $F=3.022$ ,  $P=0.006$ ). In post hoc comparisons, CRP levels were higher in  
201 overweight and obese subjects compared to normal weight subjects among those who reported  
202 no regular exercise ( $P's < 0.001$ ). However, among subjects who reported any amount of regular  
203 exercise ( $< 500$ ,  $500-1000$  or  $> 1000$  MMW), CRP levels were significantly greater only in obese  
204 subjects compared to both normal weight and overweight subjects ( $P's < 0.01$ ). In obese  
205 individuals, CRP tended to be lower in those reporting  $> 1000$  MMW compared to those  
206 reporting no regular exercise ( $P=0.053$ ).

207 We also found main effects of BMI ( $F=130.873$   $P < 0.001$ ) and MMW ( $F=11.576$ ,  
208  $P < 0.001$ ) on CRP. CRP was significantly greater with each increasing BMI category, in a dose-  
209 dependent manner ( $P's < 0.001$ ). Compared to participants who reported no regular exercise,  
210 CRP was significantly lower in those who reported  $500-1000$  and  $> 1000$  MMW ( $P's < 0.01$ ),  
211 with a trend for lower CRP in those who reported  $< 500$  MMW of regular exercise ( $P=0.078$ ).

1  
2  
3 212 **sICAM-1 (Figure 1, Panel B).** We found a significant interaction between BMI and  
4  
5 213 MMW for sICAM-1 concentration ( $F=2.701$ ,  $P=0.013$ ). Levels of sICAM-1 were significantly  
6  
7 214 lower in obese subjects who reported  $>1000$  MMW compared to obese subjects who reported no  
8  
9 215 regular exercise ( $P=0.014$ ) and  $<500$  MMW ( $P=0.026$ ) and tended to be lower than levels in  
10  
11 216 obese subjects who reported 500-1000 MMW ( $P=0.079$ ). No differences in sICAM-1 by MMW  
12  
13 217 were observed among normal weight or overweight individuals.  
14  
15

16  
17 218 We also observed a main effect of BMI ( $F=6.060$ ,  $P=0.002$ ), such that sICAM-1 levels in  
18  
19 219 obese participants were significantly higher than levels found in both normal weight and  
20  
21 220 overweight participants ( $P's<0.01$ ). No significant main effect of MMW was found for sICAM-1  
22  
23 221 ( $F=0.931$ ,  $P=0.425$ ).  
24  
25

26  
27 222 **IL-6 (Figure 1, Panel C).** Both BMI and MMW had independent effects on circulating  
28  
29 223 concentrations of IL-6 (BMI:  $F=60.150$ ,  $P<0.001$ , MMW:  $F=10.680$ ,  $P<0.001$ ), with no  
30  
31 224 significant interaction ( $F=1.21$ ,  $P=0.297$ ). We found a dose-dependent effect of BMI, such that  
32  
33 225 higher BMI levels were associated with significantly greater IL-6 ( $P's<0.001$ ). Independent of  
34  
35 226 BMI, IL-6 was significantly lower in subjects who reported regular exercise ( $<500$  MMW, 500-  
36  
37 227 1000 MMW and  $>1000$  MMW) compared to those who reported no regular exercise ( $P's <0.01$ )  
38  
39 228 with no difference between levels of MMW.  
40  
41  
42

43 229 **Fibrinogen (Figure 1, Panel D).** BMI significantly contributed to circulating levels of  
44  
45 230 fibrinogen ( $F=42.385$ ,  $P<0.001$ ), such that dose-dependent increases were observed for all BMI  
46  
47 231 levels ( $P's<0.01$ ). While we observed a trend for lower fibrinogen with regular physical activity,  
48  
49 232 similar to that of IL-6, the effect did not reach statistical significance ( $F=2.187$ ,  $P=0.088$ ). We  
50  
51 233 observed no significant interaction between BMI and MMW for fibrinogen ( $F=1.680$ ,  $P=0.122$ ).  
52  
53  
54  
55  
56  
57  
58  
59  
60

1  
2  
3 234 **sE-Selectin ( 1, Panel E).** BMI significantly contributed to circulating levels of sE-  
4  
5 235 selectin ( $F=28.253$ ,  $P<0.001$ ) with no significant contribution by MMW ( $F=0.207$ ,  $P=0.892$ ).  
6  
7  
8 236 Dose-dependent increases in sE-selectin were also observed across BMI levels ( $P$ 's $<0.01$ ). We  
9  
10 237 observed no significant interaction between BMI and MMW for sE-selectin ( $F=0.570$ ,  $P=0.755$ ).

11  
12 238 **IL-6sr (Figure 1, Panel F).** No significant main effects for BMI ( $F=1.783$ ,  $P=0.169$ ),  
13  
14  
15 239 MMW ( $F=1.434$ ,  $P=0.231$ ) or their interaction ( $F=0.834$ ,  $P=0.544$ ) were detected for IL-6sr.  
16

17 240 **Waist Circumference (WC) and Inflammatory Markers (Supplemental Figure 1).** A  
18  
19 241 secondary analysis was completed using WC and MMW as independent variables and the  
20  
21 242 complete results of these analyses are located in the supplemental information. Briefly, we  
22  
23 243 found a significant interaction between WC and MMW on sICAM-1. In individuals with an at-  
24  
25 244 risk WC ( $\geq 102.0$  cm for men and  $\geq 88.0$  cm for women), sICAM-1 was significantly lower in  
26  
27 245 those reporting 1000+ MMW compared to less than 500 MMW and tended to be lower in those  
28  
29 246 reporting no regular exercise. Overall, main effects were similar to those found for BMI and  
30  
31 247 MMW analyses. Having an at-risk WC was independently related to higher levels of CRP,  
32  
33 248 sICAM-1, IL-6, fibrinogen and sE-selectin. Independent of WC, any level of regular exercise  
34  
35 249 was related to lower levels of CRP, IL-6 with a similar tendency for fibrinogen.  
36  
37  
38  
39  
40  
41  
42

## 43 251 **DISCUSSION**

44  
45 252 The current study aimed to determine whether the impact of BMI and MMW on  
46  
47 253 inflammatory markers varied by level of overweight or obesity. For CRP and s-ICAM-1  
48  
49 254 regular physical activity appeared to diminish the effects of higher BMI compared to those who  
50  
51 255 reported no regular physical activity. In addition, we found that BMI was strongly and  
52  
53 256 independently related to greater concentrations of both established and emerging inflammatory  
54  
55  
56  
57  
58  
59  
60



1  
2  
3 257 markers that may increase CVD risk. Independent of BMI, regular physical activity was also  
4  
5 258 associated with lower IL-6, with a similar trend for fibrinogen. These results suggest that,  
6  
7  
8 259 although obesity has a clear impact on inflammation, physical activity appears to mitigate at least  
9  
10 260 some of this effect.

11  
12  
13 261 For example, overweight individuals had CRP levels that were similar to levels observed  
14  
15 262 in obese individuals if they reported no regular exercise (4.05 and 4.83  $\mu\text{g/mL}$ , respectively).  
16  
17  
18 263 CRP levels greater than 3  $\mu\text{g/mL}$  are typically associated with high CVD risk(26). In overweight  
19  
20 264 subjects who reported regular physical activity of at least 3, 20-minute sessions per week (be it  
21  
22 265 below [ $<500$ ], within [ $500-1000$ ] or above [ $>1000$ ] USDHHS MMW recommendations), CRP  
23  
24  
25 266 levels were lower and not significantly different from CRP levels found in normal weight  
26  
27 267 participants (). This suggests that increasing physical activity level to a minimum of 3 days per  
28  
29  
30 268 week, at least 20 minutes per day, may improve CRP profiles among overweight individuals.

31  
32 269 Obese individuals may require a higher level of regular physical activity in order to lower  
33  
34 270 inflammatory markers. While obese subjects also had greater levels of CRP and sICAM-1  
35  
36  
37 271 compared to lean and overweight subjects, those who reported  $>1000$  MMW (above the  
38  
39 272 USDHHS recommendation) had lower levels of sICAM-1 and tended to have lower CRP than  
40  
41 273 obese subjects reporting no regular physical activity. Taken together, we may speculate that  
42  
43  
44 274 while physical activity levels currently recommended for the general population may reduce  
45  
46 275 particular inflammatory makers in overweight populations, obese populations may require  
47  
48  
49 276 greater levels of physical activity above recommended values to reduce inflammatory markers  
50  
51 277 like CRP and sICAM-1.

52  
53 278 As expected, strong main effects of BMI were observed for CRP, IL-6, fibrinogen,  
54  
55  
56 279 sICAM-1 and sE-selectin, in agreement with previous work (27-30). Independent of BMI effects,  
57  
58  
59  
60

1  
2  
3 280 our results suggest that physical activity has differentiating effects on inflammatory markers.  
4  
5  
6 281 Individuals reporting no regular physical activity had higher levels of IL-6 with a tendency for  
7  
8 282 higher fibrinogen, compared to those reporting any level of regular physical activity (<500, 500-  
9  
10 283 1000 or >1000 MMW). Similar results have been observed in the MONItoring trends and  
11  
12 284 determinants in Cardiovascular disease (MONICA) study(31), the National Health and Nutrition  
13  
14 285 Examination Survey (NHANES III)(12, 14) and the Multi-Ethnic Study of Atherosclerosis  
15  
16 286 (MESA)(32), such that both increased frequency and intensity of physical activity have been  
17  
18 287 related to lower IL-6 and fibrinogen. Our findings add to these prior results by standardizing  
19  
20 288 levels of physical activity by using USDHHS. Our results suggest that, regular physical activity  
21  
22 289 at any level (<500, 500-1000, >1000) appears to be associated with lower levels of IL-6 and  
23  
24 290 possibly fibrinogen, independent of BMI.  
25  
26  
27  
28

29 291 Although IL-6 produced in hypertrophied adipose tissue(33, 34) initiates the acute phase  
30  
31 292 response, marked by the release of hepatic CRP (35, 36), an interaction between BMI and  
32  
33 293 physical activity was detected for CRP, but not IL-6. While IL-6 and CRP were significantly  
34  
35 294 correlated ( $r=0.514$ , see Supplemental Table 1), this correlation suggests that IL-6 levels do not  
36  
37 295 fully explain CRP levels at any given moment. Further, CRP is a more stable biomarker, owing  
38  
39 296 to its substantially longer plasma half-life (37), which may improve our ability to detect  
40  
41 297 interaction effects in CRP compared to IL-6.  
42  
43  
44  
45

46 298 Interestingly, our results also suggest that regular exercise may have a more profound  
47  
48 299 impact on lowering classical markers of inflammation and less impact on the inflammatory status  
49  
50 300 of the endothelium. Regular physical activity has reliably been associated with lower levels of  
51  
52 301 IL-6 and CRP, both classical inflammatory markers related to adipose and systemic  
53  
54 302 inflammation(38). However, regular exercise appeared to have no independent impact on  
55  
56  
57  
58  
59  
60

1  
2  
3 303 markers of endothelial activation, particularly sE-selectin. Higher levels of exercise were related  
4  
5 304 to lower sICAM-1 in obese individuals only. In one prior study, inverse relationships between  
6  
7  
8 305 physical activity and sICAM-1 and sE-selectin were reported in drug-treated hypertensive men  
9  
10 306 (39). Thus, further research is necessary to understand mechanisms underlying differential  
11  
12 307 associations of exercise with systemic and endothelial inflammation.  
13  
14

15 308 Several limitations must be addressed. First, the cross-sectional design does not allow us  
16  
17 309 to infer causal relationships. Prospective and interventional designs are necessary to confirm our  
18  
19 310 findings. No objective measures of physical activity were available in the MIDUS sample.  
20  
21 311 Therefore, the use of self-report physical activity data may have diminished our ability to detect  
22  
23 312 effects. However, in addition to being in line with previous studies using self-report physical  
24  
25 313 activity, our findings are also in line with previous studies(40, 41) that demonstrated that higher  
26  
27 314 cardiorespiratory fitness, as measured by indirect calorimetry, was associated with lower levels  
28  
29 315 of inflammation independent of visceral adiposity or BMI. Another limitation is that the sample  
30  
31 316 was predominantly comprised of non-Hispanic white individuals, suggesting that findings may  
32  
33 317 not extend to all ethnicities. Finally, BMI and physical activity variables are correlated,  
34  
35 318 potentially raising the concern of small sample sizes in specific groups crossed by BMI and  
36  
37 319 MMW. However, the smallest group for analyses still contained 54 individuals (normal weight  
38  
39 320 individuals reporting no exercise).  
40  
41  
42  
43  
44  
45

46 321 In summary, our results demonstrate both interactive and independent influences of BMI  
47  
48 322 and levels of physical activity on both established and emerging markers of inflammation.  
49  
50 323 Inflammation is both a consequence of obesity and a mechanism promoting CVD. Regular  
51  
52 324 physical activity appears to mitigate the effects of higher BMI on some inflammatory markers,  
53  
54 325 particularly CRP, which is strongly implicated in CVD. Importantly, while any level of regular  
55  
56  
57  
58  
59  
60

1  
2  
3 326 physical activity may help reduce inflammation in overweight individuals, similar effects in  
4  
5  
6 327 obese individuals may require levels of physical activity that are greater than currently  
7  
8 328 recommended by the USDHHS for general health.  
9

10 329

11  
12 330

13  
14 331

15  
16 332

17  
18 333

19  
20 334

21  
22 335

23  
24 336

25  
26 337

27  
28 338

29  
30 339

31  
32 340

33  
34 341

35  
36 342

37  
38 343

39  
40 344

41  
42 345

43  
44 346

45  
46 347

47  
48 348

49  
50  
51  
52  
53  
54  
55  
56  
57  
58  
59  
60

1  
2  
3 349 **ACKNOWLEDGEMENTS**  
4

5 350 We thank the staff of the Clinical Research Centers at the University of Wisconsin-Madison,  
6  
7  
8 351 UCLA, and Georgetown University for their effort in conducting the original data collection.  
9

10 352

11  
12  
13 353 **FUNDING**  
14

15 354 KS was supported through a T32 Training Fellowship (Training in Behavioral and Preventive  
16  
17 355 Medicine; T32 HL076134). The original research was supported by a grant from the National  
18  
19  
20 356 Institute on Aging (P01-AG020166) to conduct a longitudinal follow-up of the MIDUS (Midlife  
21  
22 357 in the U.S.) Investigation.  
23  
24  
25 358

26  
27 359 The original study was supported by the John D. and Catherine T. MacArther Foundation  
28  
29 360 Research Network on Successful Midlife Development and by the following grants: M01-  
30  
31 361 RR023942 (Georgetown), M01-RR00865 (UCLA) from the General Clinical Research Centers  
32  
33  
34 362 Program and 1UL1RR025011 (UW) from the Clinical and Translational Science Award (CTSA)  
35  
36 363 program of the National Center for Research Resources, National Institutes of Health.  
37  
38  
39 364

40  
41 365 **CONFLICTS OF INTEREST**  
42

43 366 The authors declare no conflict of interest.  
44  
45  
46 367

47  
48 368 **CONTRIBUTORSHIP**  
49

50 369 KS, JMM and RRW each made substantial contributions to the conception and design of the  
51  
52  
53 370 study, data acquisition, analysis and interpretation, as well as to drafting and revision for  
54  
55 371 substantial intellectual content. All authors made final approval of the version to be published.  
56  
57  
58  
59  
60

1  
2  
3 3724  
5  
6 373 **DATA SHARING STATEMENT**7  
8 374 Data and documentation for MIDUS studies are available at the Inter-university Consortium for9  
10 375 Political and Social Research (ICPSR). <http://www.icpsr.umich.edu/icpsrweb/landing.jsp>11  
12  
13 37614  
15 377**ARTICLE SUMMARY****Article focus**16  
17 378

- 18 • Systemic inflammation is related to the progression of  
19 cardiovascular disease.
- 20 379 • Independent of obesity, physical activity is inversely related to  
21 concentrations of well-established inflammatory biomarkers,  
22 380 such as C-reactive protein (CRP) or interleukin-6 (IL-6).
- 23 381 • This article evaluates interactive effects of body mass index and  
24 physical activity on established inflammatory markers, CRP,  
25 382 IL-6, and emerging inflammatory markers, fibrinogen, soluble  
26 intracellular adhesion molecule (sICAM)-1, soluble E-selectin,  
27 383 and IL-6 soluble receptor.

28  
29  
30  
31**Key messages**

32 384

- 33 • Interactive effects of body mass index and physical activity  
34 385 were observed for CRP, such that regular physical activity  
35 reported by overweight individuals was related to significantly  
36 386 lower CRP levels compared to those reported no regular  
37 activity.
- 38 • Independent of BMI, regular physical activity was related to  
39 387 lower IL-6, with a trend for lower fibrinogen
- 40 • Physical activity had no independent effect on circulating  
41 388 markers related to endothelial inflammation, such as sICAM-1  
42 or sE-selectin.

43  
44 389**Strengths and limitations**45  
46 390

- 47 • 1254 adults from the National Survey of Midlife Development  
48 391 in the United States (MIDUS) Biomarker Project were  
49 analyzed. Statistical analyses were adjusted for age, sex,  
50 392 smoking, and relevant medication use. A strength of this paper  
51 is categorizing physical activity levels based on national  
52 393 recommendations. This data may be used to determine  
53 appropriate levels of physical activity necessary for reducing  
54 394 inflammation in overweight and obese adults. However, cross-  
55 sectional data is limited, as causal inferences cannot be  
56 obtained. A second limitation is that the sample was  
57 predominantly comprised of non-Hispanic white individuals,  
58 therefore findings may not extend to all ethnicities.

59  
60

395 **REFERENCES**

- 396 1. Blair SN, Brodney S. Effects of physical inactivity and obesity on morbidity and  
397 mortality: current evidence and research issues. *Med Sci Sports Exerc.* 1999;31(11 Suppl):S646-  
398 62. Epub 1999/12/11.
- 399 2. Hotamisligil GS. Inflammation and metabolic disorders. *Nature.* 2006;444(7121):860-7.  
400 Epub 2006/12/15.
- 401 3. Koenig W, Khuseyinova N, Baumert J, et al. Increased concentrations of C-reactive  
402 protein and IL-6 but not IL-18 are independently associated with incident coronary events in  
403 middle-aged men and women: results from the MONICA/KORA Augsburg case-cohort study,  
404 1984-2002. *Arterioscler Thromb Vasc Biol.* 2006;26(12):2745-51. Epub 2006/09/30.
- 405 4. Papageorgiou N, Tousoulis D, Siasos G, et al. Is fibrinogen a marker of inflammation in  
406 coronary artery disease? *Hellenic J Cardiol.* 2010;51(1):1-9. Epub 2010/02/02.
- 407 5. Schmidt C, Hulthe J, Fagerberg B. Baseline ICAM-1 and VCAM-1 are increased in  
408 initially healthy middle-aged men who develop cardiovascular disease during 6.6 years of  
409 follow-up. *Angiology.* 2009;60(1):108-14. Epub 2008/05/28.
- 410 6. Demerath E, Towne B, Blangero J, et al. The relationship of soluble ICAM-1, VCAM-1,  
411 P-selectin and E-selectin to cardiovascular disease risk factors in healthy men and women. *Ann*  
412 *Hum Biol.* 2001;28(6):664-78. Epub 2001/12/01.
- 413 7. Rocha VZ, Libby P. Obesity, inflammation, and atherosclerosis. *Nat Rev Cardiol.*  
414 2009;6(6):399-409. Epub 2009/04/29.
- 415 8. Calabro P, Yeh ET. Obesity, inflammation, and vascular disease: the role of the adipose  
416 tissue as an endocrine organ. *Subcell Biochem.* 2007;42:63-91. Epub 2007/07/07.

- 1  
2  
3 417 9. Pou KM, Massaro JM, Hoffmann U, et al. Visceral and subcutaneous adipose tissue  
4  
5 418 volumes are cross-sectionally related to markers of inflammation and oxidative stress: the  
6  
7 419 Framingham Heart Study. *Circulation*. 2007;116(11):1234-41. Epub 2007/08/22.
- 8  
9  
10 420 10. Mathieu P, Poirier P, Pibarot P, et al. Visceral obesity: the link among inflammation,  
11  
12 421 hypertension, and cardiovascular disease. *Hypertension*. 2009;53(4):577-84. Epub 2009/02/25.
- 13  
14  
15 422 11. Reuben DB, Judd-Hamilton L, Harris TB, et al. The associations between physical  
16  
17 423 activity and inflammatory markers in high-functioning older persons: MacArthur Studies of  
18  
19 424 Successful Aging. *J Am Geriatr Soc*. 2003;51(8):1125-30. Epub 2003/08/02.
- 20  
21  
22 425 12. King DE, Carek P, Mainous AG, 3rd, et al. Inflammatory markers and exercise:  
23  
24 426 differences related to exercise type. *Med Sci Sports Exerc*. 2003;35(4):575-81. Epub 2003/04/04.
- 25  
26  
27 427 13. Wannamethee SG, Lowe GD, Whincup PH, et al. Physical activity and hemostatic and  
28  
29 428 inflammatory variables in elderly men. *Circulation*. 2002;105(15):1785-90. Epub 2002/04/17.
- 30  
31  
32 429 14. Abramson JL, Vaccarino V. Relationship between physical activity and inflammation  
33  
34 430 among apparently healthy middle-aged and older US adults. *Arch Intern Med*.  
35  
36 431 2002;162(11):1286-92. Epub 2002/06/01.
- 37  
38  
39 432 15. Geffken DF, Cushman M, Burke GL, et al. Association between physical activity and  
40  
41 433 markers of inflammation in a healthy elderly population. *Am J Epidemiol*. 2001;153(3):242-50.  
42  
43 434 Epub 2001/02/07.
- 44  
45  
46 435 16. Taaffe DR, Harris TB, Ferrucci L, et al. Cross-sectional and prospective relationships of  
47  
48 436 interleukin-6 and C-reactive protein with physical performance in elderly persons: MacArthur  
49  
50 437 studies of successful aging. *J Gerontol A Biol Sci Med Sci*. 2000;55(12):M709-15. Epub  
51  
52 438 2000/12/29.
- 53  
54  
55  
56  
57  
58  
59  
60



- 1  
2  
3 439 17. Starkie R, Ostrowski SR, Jauffred S, et al. Exercise and IL-6 infusion inhibit endotoxin-  
4  
5 440 induced TNF-alpha production in humans. FASEB J. 2003;17(8):884-6. Epub 2003/03/11.  
6  
7  
8 441 18. Pedersen BK, Steensberg A, Fischer C, et al. Exercise and cytokines with particular focus  
9  
10 442 on muscle-derived IL-6. Exerc Immunol Rev. 2001;7:18-31. Epub 2001/10/03.  
11  
12  
13 443 19. Pedersen BK, Steensberg A, Fischer C, et al. The metabolic role of IL-6 produced during  
14  
15 444 exercise: is IL-6 an exercise factor? Proc Nutr Soc. 2004;63(2):263-7. Epub 2004/08/06.  
16  
17  
18 445 20. Trayhurn P, Wood IS. Adipokines: inflammation and the pleiotropic role of white  
19  
20 446 adipose tissue. Br J Nutr. 2004;92(3):347-55. Epub 2004/10/08.  
21  
22  
23 447 21. Beavers KM, Brinkley TE, Nicklas BJ. Effect of exercise training on chronic  
24  
25 448 inflammation. Clin Chim Acta. 2010;411(11-12):785-93. Epub 2010/03/02.  
26  
27  
28 449 22. USDHHS, editor. 2008 Physical Activity Guidelines for Americans. Washington  
29  
30 450 DC2008.  
31  
32 451 23. C Ryff DA, JS Ayanian, DS carr, PD Cleary, C Coe, R Davidson, RF Krueger, ME  
33  
34 452 Lachman, NF Marks, DK Mroczek, T Seeman, MM Seltzer, BH Singer, RP Sloan, PA Tun, M  
35  
36 453 Weinstein, D Williams. National Survey of Midlife Development in the United State (MIDUS II),  
37  
38 454 2004-2006. Inter-university Consortium for Political and Social Research (ICPSR) [distributor].  
39  
40 455 2011.  
41  
42  
43 456 24. Kraemer H. How Many Subjects? Statistical Power Analysis in Research: SAGE  
44  
45 457 Publications, Inc; 1987.  
46  
47  
48 458 25. Cohen J. Statistical Power Analysis for the Behavioral Sciences. Second ed: Lawrence  
49  
50 459 Erlbaum Associates; 1998.  
51  
52  
53 460 26. Bassuk SS, Rifai N, Ridker PM. High-sensitivity C-reactive protein: clinical importance.  
54  
55 461 Curr Probl Cardiol. 2004;29(8):439-93. Epub 2004/07/20.  
56  
57  
58  
59  
60

- 1  
2  
3 462 27. Park HS, Park JY, Yu R. Relationship of obesity and visceral adiposity with serum  
4  
5 463 concentrations of CRP, TNF-alpha and IL-6. *Diabetes Res Clin Pract.* 2005;69(1):29-35. Epub  
6  
7 464 2005/06/16.
- 8  
9  
10 465 28. Bastard JP, Jardel C, Bruckert E, et al. Elevated levels of interleukin 6 are reduced in  
11  
12 466 serum and subcutaneous adipose tissue of obese women after weight loss. *J Clin Endocrinol*  
13  
14 467 *Metab.* 2000;85(9):3338-42. Epub 2000/09/22.
- 15  
16  
17 468 29. Ditschuneit HH, Flechtner-Mors M, Adler G. Fibrinogen in obesity before and after  
18  
19 469 weight reduction. *Obes Res.* 1995;3(1):43-8. Epub 1995/01/01.
- 20  
21  
22 470 30. Straczkowski M, Lewczuk P, Dzienis-Straczkowska S, et al. Elevated soluble  
23  
24 471 intercellular adhesion molecule-1 levels in obesity: relationship to insulin resistance and tumor  
25  
26 472 necrosis factor-alpha system activity. *Metabolism.* 2002;51(1):75-8. Epub 2002/01/10.
- 27  
28  
29 473 31. Autenrieth C, Schneider A, Doring A, et al. Association between different domains of  
30  
31 474 physical activity and markers of inflammation. *Med Sci Sports Exerc.* 2009;41(9):1706-13. Epub  
32  
33 475 2009/08/07.
- 34  
35  
36 476 32. Majka DS, Chang RW, Vu TH, et al. Physical activity and high-sensitivity C-reactive  
37  
38 477 protein: the multi-ethnic study of atherosclerosis. *Am J Prev Med.* 2009;36(1):56-62. Epub  
39  
40 478 2008/11/18.
- 41  
42  
43 479 33. Day CP. From fat to inflammation. *Gastroenterology.* 2006;130(1):207-10. Epub  
44  
45 480 2006/01/13.
- 46  
47  
48 481 34. Fain JN, Madan AK, Hiler ML, et al. Comparison of the release of adipokines by adipose  
49  
50 482 tissue, adipose tissue matrix, and adipocytes from visceral and subcutaneous abdominal adipose  
51  
52 483 tissues of obese humans. *Endocrinology.* 2004;145(5):2273-82. Epub 2004/01/17.
- 53  
54  
55  
56  
57  
58  
59  
60

- 1  
2  
3 484 35. Castell JV, Gomez-Lechon MJ, David M, et al. Interleukin-6 is the major regulator of  
4  
5 485 acute phase protein synthesis in adult human hepatocytes. *FEBS Lett.* 1989;242(2):237-9. Epub  
6  
7 486 1989/01/02.  
8  
9  
10 487 36. Heinrich PC, Castell JV, Andus T. Interleukin-6 and the acute phase response. *Biochem J.*  
11  
12 488 1990;265(3):621-36. Epub 1990/02/01.  
13  
14  
15 489 37. Pradhan AD, Manson JE, Rifai N, et al. C-reactive protein, interleukin 6, and risk of  
16  
17 490 developing type 2 diabetes mellitus. *JAMA.* 2001;286(3):327-34. Epub 2001/07/24.  
18  
19  
20 491 38. Mathieu P, Lemieux I, Despres JP. Obesity, inflammation, and cardiovascular risk. *Clin*  
21  
22 492 *Pharmacol Ther.* 2010;87(4):407-16. Epub 2010/03/05.  
23  
24  
25 493 39. Hjelstuen A, Anderssen SA, Holme I, et al. Markers of inflammation are inversely related  
26  
27 494 to physical activity and fitness in sedentary men with treated hypertension. *Am J Hypertens.*  
28  
29 495 2006;19(7):669-75; discussion 76-7. Epub 2006/07/04.  
30  
31  
32 496 40. Church TS, Barlow CE, Earnest CP, et al. Associations between cardiorespiratory fitness  
33  
34 497 and C-reactive protein in men. *Arterioscler Thromb Vasc Biol.* 2002;22(11):1869-76. Epub  
35  
36 498 2002/11/12.  
37  
38  
39 499 41. Arsenault BJ, Cartier A, Cote M, et al. Body composition, cardiorespiratory fitness, and  
40  
41 500 low-grade inflammation in middle-aged men and women. *Am J Cardiol.* 2009;104(2):240-6.  
42  
43 501 Epub 2009/07/07.  
44  
45  
46 502  
47  
48 503  
49  
50 504  
51  
52 505  
53  
54  
55 506  
56  
57  
58  
59  
60

1  
2  
3 507 **FIGURE AND TABLE LEGENDS**  
4  
5  
6 508  
7  
8 509  
9

10 **Figure 1: Inflammatory Markers.** Data from 1254 men and women in MIDUS. Joint  
11 association of BMI category (normal, overweight and obese) and MMW category (no regular  
12 exercise, <500 MMW, 500-1000 MMW and >1000 MMW) for CRP (A), sICAM-1 (B), IL-6 (C),  
13 fibrinogen (D), sE-Selectin (E) and IL-6sr (F). These analyses were adjusted for age, sex,  
14  
15  
16  
17  
18  
19  
20 smoking and relevant medication use. **The analysis for sICAM-1 was further adjusted for race.**  
21  
22 Error bars represent SEM. BMI=BMI main effect P value, MMW=MMW main effect P value,  
23  
24  
25  
26  
27  
28  
29  
30  
31  
32  
33  
34  
35  
36  
37  
38  
39  
40  
41  
42  
43  
44  
45  
46  
47  
48  
49  
50  
51  
52  
53  
54  
55  
56  
57  
58  
59  
60

519 **Table 1: Subject Characteristics.** BMI = body mass index; CRP = C-reactive protein; IL =  
520 interleukin; IL-6sr = IL-6 soluble receptor; MMW = MET-Minutes per Week; sE-Selectin =  
521 soluble E-Selectin; sICAM-1= soluble intracellular adhesion molecule-1.  
522

**STROBE 2007 (v4) checklist of items to be included in reports of observational studies in epidemiology\***  
**Checklist for cohort, case-control, and cross-sectional studies (combined)**

| Section/Topic             | Item # | Recommendation                                                                                                                                                                                                                                                                                                                                                                                                                                                         | Reported on page # |
|---------------------------|--------|------------------------------------------------------------------------------------------------------------------------------------------------------------------------------------------------------------------------------------------------------------------------------------------------------------------------------------------------------------------------------------------------------------------------------------------------------------------------|--------------------|
| Title and abstract        | 1      | (a) Indicate the study's design with a commonly used term in the title or the abstract                                                                                                                                                                                                                                                                                                                                                                                 | 1                  |
|                           |        | (b) Provide in the abstract an informative and balanced summary of what was done and what was found                                                                                                                                                                                                                                                                                                                                                                    | 2                  |
| <b>Introduction</b>       |        |                                                                                                                                                                                                                                                                                                                                                                                                                                                                        |                    |
| Background/rationale      | 2      | Explain the scientific background and rationale for the investigation being reported                                                                                                                                                                                                                                                                                                                                                                                   | 3                  |
| Objectives                | 3      | State specific objectives, including any pre-specified hypotheses                                                                                                                                                                                                                                                                                                                                                                                                      | 3                  |
| <b>Methods</b>            |        |                                                                                                                                                                                                                                                                                                                                                                                                                                                                        |                    |
| Study design              | 4      | Present key elements of study design early in the paper                                                                                                                                                                                                                                                                                                                                                                                                                | 4                  |
| Setting                   | 5      | Describe the setting, locations, and relevant dates, including periods of recruitment, exposure, follow-up, and data collection                                                                                                                                                                                                                                                                                                                                        | 4                  |
| Participants              | 6      | (a) <i>Cohort study</i> —Give the eligibility criteria, and the sources and methods of selection of participants. Describe methods of follow-up<br><i>Case-control study</i> —Give the eligibility criteria, and the sources and methods of case ascertainment and control selection. Give the rationale for the choice of cases and controls<br><i>Cross-sectional study</i> —Give the eligibility criteria, and the sources and methods of selection of participants | 4                  |
|                           |        | (b) <i>Cohort study</i> —For matched studies, give matching criteria and number of exposed and unexposed<br><i>Case-control study</i> —For matched studies, give matching criteria and the number of controls per case                                                                                                                                                                                                                                                 | N/A                |
| Variables                 | 7      | Clearly define all outcomes, exposures, predictors, potential confounders, and effect modifiers. Give diagnostic criteria, if applicable                                                                                                                                                                                                                                                                                                                               | 4-7                |
| Data sources/ measurement | 8*     | For each variable of interest, give sources of data and details of methods of assessment (measurement). Describe comparability of assessment methods if there is more than one group                                                                                                                                                                                                                                                                                   | 4-7                |
| Bias                      | 9      | Describe any efforts to address potential sources of bias                                                                                                                                                                                                                                                                                                                                                                                                              | 7                  |
| Study size                | 10     | Explain how the study size was arrived at                                                                                                                                                                                                                                                                                                                                                                                                                              | 4                  |
| Quantitative variables    | 11     | Explain how quantitative variables were handled in the analyses. If applicable, describe which groupings were chosen and why                                                                                                                                                                                                                                                                                                                                           | 4-7                |
| Statistical methods       | 12     | (a) Describe all statistical methods, including those used to control for confounding                                                                                                                                                                                                                                                                                                                                                                                  | 7                  |
|                           |        | (b) Describe any methods used to examine subgroups and interactions                                                                                                                                                                                                                                                                                                                                                                                                    | 7                  |
|                           |        | (c) Explain how missing data were addressed                                                                                                                                                                                                                                                                                                                                                                                                                            | 7                  |
|                           |        | (d) <i>Cohort study</i> —If applicable, explain how loss to follow-up was addressed<br><i>Case-control study</i> —If applicable, explain how matching of cases and controls was addressed                                                                                                                                                                                                                                                                              | N/A                |

|                          |     |                                                                                                                                                                                                              |      |
|--------------------------|-----|--------------------------------------------------------------------------------------------------------------------------------------------------------------------------------------------------------------|------|
|                          |     | <i>Cross-sectional study</i> —If applicable, describe analytical methods taking account of sampling strategy                                                                                                 |      |
|                          |     | (e) Describe any sensitivity analyses                                                                                                                                                                        | N/A  |
| <b>Results</b>           |     |                                                                                                                                                                                                              |      |
| Participants             | 13* | (a) Report numbers of individuals at each stage of study—eg numbers potentially eligible, examined for eligibility, confirmed eligible, included in the study, completing follow-up, and analysed            | 8    |
|                          |     | (b) Give reasons for non-participation at each stage                                                                                                                                                         | N/A  |
|                          |     | (c) Consider use of a flow diagram                                                                                                                                                                           | N/A  |
| Descriptive data         | 14* | (a) Give characteristics of study participants (eg demographic, clinical, social) and information on exposures and potential confounders                                                                     | 8    |
|                          |     | (b) Indicate number of participants with missing data for each variable of interest                                                                                                                          | 8    |
|                          |     | (c) <i>Cohort study</i> —Summarise follow-up time (eg, average and total amount)                                                                                                                             | N/A  |
| Outcome data             | 15* | <i>Cohort study</i> —Report numbers of outcome events or summary measures over time                                                                                                                          |      |
|                          |     | <i>Case-control study</i> —Report numbers in each exposure category, or summary measures of exposure                                                                                                         |      |
|                          |     | <i>Cross-sectional study</i> —Report numbers of outcome events or summary measures                                                                                                                           | 8-10 |
| Main results             | 16  | (a) Give unadjusted estimates and, if applicable, confounder-adjusted estimates and their precision (eg, 95% confidence interval). Make clear which confounders were adjusted for and why they were included | 8-10 |
|                          |     | (b) Report category boundaries when continuous variables were categorized                                                                                                                                    | 8-10 |
|                          |     | (c) If relevant, consider translating estimates of relative risk into absolute risk for a meaningful time period                                                                                             | N/A  |
| Other analyses           | 17  | Report other analyses done—eg analyses of subgroups and interactions, and sensitivity analyses                                                                                                               | N/A  |
| <b>Discussion</b>        |     |                                                                                                                                                                                                              |      |
| Key results              | 18  | Summarise key results with reference to study objectives                                                                                                                                                     | 10   |
| Limitations              | 19  | Discuss limitations of the study, taking into account sources of potential bias or imprecision. Discuss both direction and magnitude of any potential bias                                                   | 13   |
| Interpretation           | 20  | Give a cautious overall interpretation of results considering objectives, limitations, multiplicity of analyses, results from similar studies, and other relevant evidence                                   | 14   |
| Generalisability         | 21  | Discuss the generalisability (external validity) of the study results                                                                                                                                        | 14   |
| <b>Other information</b> |     |                                                                                                                                                                                                              |      |
| Funding                  | 22  | Give the source of funding and the role of the funders for the present study and, if applicable, for the original study on which the present article is based                                                | 15   |

\*Give information separately for cases and controls in case-control studies and, if applicable, for exposed and unexposed groups in cohort and cross-sectional studies.

**Note:** An Explanation and Elaboration article discusses each checklist item and gives methodological background and published examples of transparent reporting. The STROBE checklist is best used in conjunction with this article (freely available on the Web sites of PLoS Medicine at <http://www.plosmedicine.org/>, Annals of Internal Medicine at <http://www.annals.org/>, and Epidemiology at <http://www.epidem.com/>). Information on the STROBE Initiative is available at [www.strobe-statement.org](http://www.strobe-statement.org).

| Demographic                 | BMI < 25<br>N=298 | BMI 25-29.9<br>N=440 | BMI ≥30<br>N=516  | Overall<br>N = 1254 |
|-----------------------------|-------------------|----------------------|-------------------|---------------------|
| Variables                   | Mean ± SD         |                      |                   |                     |
| Age (years)                 | 54.6 ± 12.8       | 56.4 ± 11.7          | 54.6 ± 11.2       | 54.5 ± 11.7         |
| Gender (%)                  |                   |                      |                   |                     |
| Male                        | 31.2              | 52.7                 | 42.1              | 43.20               |
| Female                      | 68.8              | 47.3                 | 57.9              | 56.80               |
| Race (%)                    |                   |                      |                   |                     |
| Non-Hispanic White          | 94.0              | 94.0                 | 90.3              | 92.60               |
| Hispanic                    | 0.4               | 0.8                  | 0.3               | 0.05                |
| African American            | 1.9               | 1.6                  | 4.0               | 2.60                |
| Asian/Pacific Islander      | 0.7               | 0.3                  | 0.0               | 0.30                |
| Native American             | 1.1               | 0.8                  | 2.0               | 1.30                |
| Other                       | 1.9               | 2.6                  | 3.5               | 2.30                |
| Medication Use (%)          |                   |                      |                   |                     |
| Cholesterol-Lowering        | 13.1              | 32.3                 | 32.6              | 27.80               |
| Corticosteroids             | 12.8              | 12.5                 | 11.4              | 12.10               |
| Anti-Diabetic               | 4.7               | 8.4                  | 15.3              | 10.40               |
| Antidepressant              | 14.4              | 13.4                 | 16.9              | 14.2                |
| Hormone Replacement Therapy | 9.4               | 8.6                  | 5.0               | 7.3                 |
| Oral Contraceptive          | 3.7               | 3.4                  | 1.0               | 2.5                 |
| Currently Smoking           | 17.8              | 14.1                 | 14.0              | 14.90               |
| BMI (kg/m <sup>2</sup> )    | 22.7 ± 1.8        | 27.4 ± 1.4           | 35.9 ± 5.7        | 29.8 ± 6.6          |
| IL-6 (pg/mL)                | 2.4 ± 3.1         | 2.7 ± 2.48           | 3.7 ± 3.2         | 3.0 ± 3.1           |
| IL-6sr (pg/mL)              | 34473.1 ± 10861.9 | 35337.4 ± 10065.1    | 35475.7 ± 10325.7 | 35184.7 ± 10359.1   |
| CRP (µg/mL)                 | 1.5 ± 2.5         | 2.5 ± 4.0            | 4.4 ± 5.9         | 3.0 ± 4.8           |
| Fibrinogen (mg/dL)          | 315.8 ± 75.9      | 343.2 ± 82.1         | 373 ± 92.1        | 348.9 ± 87.9        |
| sE-Selectin (ng/mL)         | 36.9 ± 19.6       | 41.2 ± 20.6          | 49.1 ± 24.7       | 43.4 ± 22.7         |
| sICAM-1 (ng/mL)             | 284.8 ± 122.0     | 276.2 ± 99.9         | 301.4 ± 123.1     | 288.6 ± 115.6       |

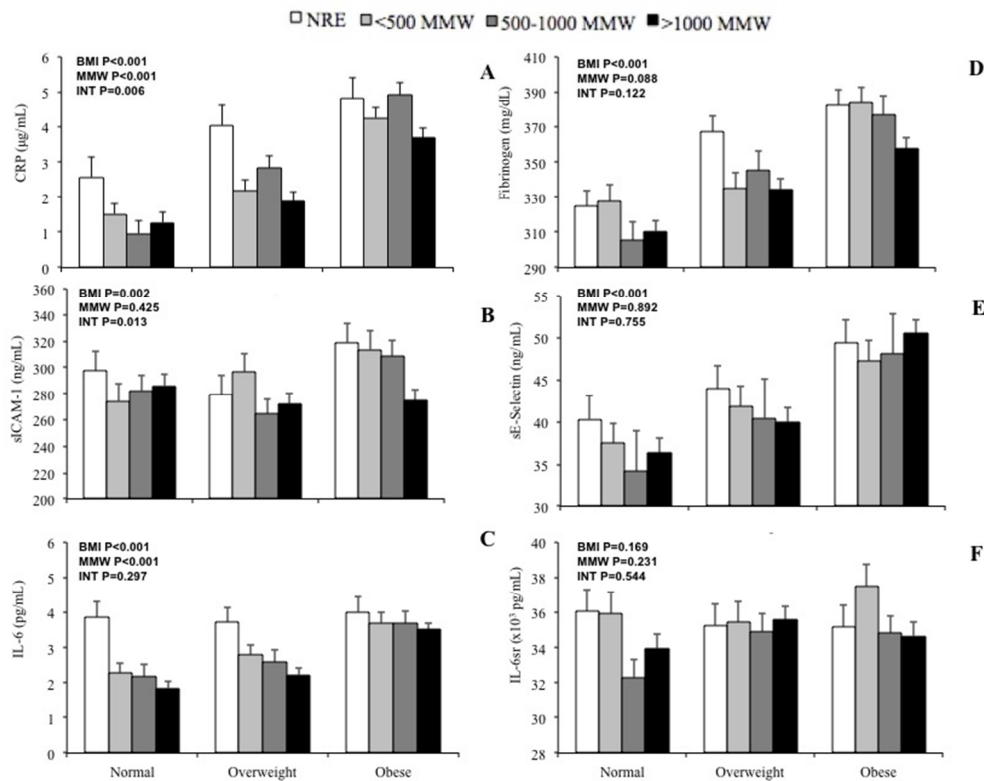

Figure 1: Inflammatory Markers. Data from 1255 men and women in MIDUS. Joint association of BMI category (normal, overweight and obese) and MMW category (no regular exercise, <500 MMW, 500-1000 MMW and >1000 MMW) for CRP (A), sICAM-1 (B), IL-6 (C), fibrinogen (D), sE-Selectin (E) and IL-6sr (F). These analyses were adjusted for age, sex, smoking and relevant medication use. Error bars represent SEM. BMI=BMI main effect P value, MMW=MMW main effect P value, INT=interaction effect P value. 292x229mm (72 x 72 DPI)

only



### **Waist Circumference (WC) and MET-Minutes per Week (MMW)**

*CRP (Supplementary Figure 1, panel A).* We found no significant interaction effect between WC and MMW for CRP ( $F=1.426$ ,  $P=0.234$ ). We found significant main effects for WC ( $F=159.669$ ,  $P<0.001$ ) and MMW ( $F=9.766$ ,  $P<0.001$ ) on circulating CRP. CRP levels were lower in participants who reported a normal waist circumference and any level of regular exercise (<500, 500-1000, and >1000 MMW), compared to those with an at-risk waist circumference ( $P's<0.001$ ) and those no regular exercise ( $P's<0.05$ ).

*sICAM-1 (Supplementary Figure 1, panel B).* We found a significant interaction effect between WC and MMW for sICAM-1 ( $F=4.846$ ,  $P=0.002$ ). While sICAM-1 levels were not significantly difference across MMW categories in individuals with a normal WC ( $P's>0.05$ ), in individuals with an at-risk WC, sICAM-1 was significantly lower in those reporting 1000+ MMW compared to less than 500 MMW ( $P=0.007$ ) and tended to be lower in those reporting no regular exercise ( $P=0.072$ ). Similar to BMI, waist circumference independently contributed to sICAM-1 ( $F=26.841$ ,  $P<0.001$ ), such that values were greater in subjects with an at-risk WC compared to those with a normal WC ( $P <0.001$ ). No effect of MMW was observed ( $F=1.055$ ,  $P=0.367$ ) for sICAM-1.

*IL-6 (Supplementary Figure 1, panel C).* We found no significant interaction effect between WC and MMW for IL-6 ( $F=1.282$ ,  $P=0.217$ ). We found significant main effects for waist circumference ( $F=84.441$ ,  $P<0.001$ ) and MMW ( $F=10.255$ ,  $P<0.001$ ), such that IL-6 levels were lower in participants who reported an normal waist circumference and any level of regular exercise (<500, 500-1000, and >1000 MMW), compared to those with an at risk waist circumference ( $P's<0.001$ ) and those reporting no regular exercise ( $P's<0.05$ ).

1  
2  
3  
4  
5  
6  
7  
8  
9  
10  
11  
12  
13  
14  
15  
16  
17  
18  
19  
20  
21  
22  
23  
24  
25  
26  
27  
28  
29  
30  
31  
32  
33  
34  
35  
36  
37  
38  
39  
40  
41  
42  
43  
44  
45  
46  
47  
48  
49  
50  
51  
52  
53  
54  
55  
56  
57  
58  
59  
60

*Fibrinogen (Supplementary Figure 1, panel D).* We found no significant interaction effect between WC and MMW for fibrinogen ( $F=2.019$ ,  $P=0.110$ ). Waist circumference also impacted fibrinogen ( $F=38.960$ ,  $P<0.001$ ), such that values were greater in subjects with an at-risk waist circumference compared to those with a normal waist circumference ( $P$ 's  $<0.001$ ). The effect of MMW on fibrinogen bordered on statistical significance ( $F=2.245$ ,  $P=0.081$ ), such that values were lower with in individuals who reported greater MMW.

*sE-Selectin (Supplementary Figure 1, panel E).* We found no significant interaction between WC and MMW for sE-Selectin ( $F=0.041$ ,  $P=0.989$ ). Waist circumference also independently contributed to sE-selectin ( $F=40.967$ ,  $P<0.001$ ), such that values were greater in subjects with an at-risk waist circumference compared to those with a normal waist circumference ( $P <0.001$ ). No effect of MMW was observed for sE-selectin ( $F=0.172$ ,  $P=0.916$ ).

*IL-6sr (Supplementary Figure 1, panel F).* We found no significant interaction effect between WC and MMW for IL-6sr ( $F=0.769$ ,  $P=0.511$ ). Like BMI, we found no main effects for waist circumference ( $F=3.505$ ,  $P=0.061$ ) or MMW on IL-6sr ( $F=1.158$ ,  $P=0.325$ ).

*Interrelationship of Inflammatory Markers.* Correlations between all inflammatory markers are shown in Supplementary Table 1.

## Figure Legend

### Supplemental Figure 1. Waist Circumference (WC), MET Minutes per Week (MMW)

**and Inflammatory Markers.** Data from 1255 men and women in MIDUS. Joint association of WC category (normal [ $\geq 102.0$  cm for men and  $\geq 88.0$  cm for women], at risk [ $> 102.0$  cm for men and  $> 88.0$  cm for women]) and MMW category (no regular exercise,  $< 500$  MMW, 500-1000 MMW and  $> 1000$  MMW) for CRP (A), sICAM-1 (B), IL-6 (C), fibrinogen (D), sE-Selectin (E) and IL-6sr (F). These analyses were adjusted for age, sex, smoking and relevant medication use. Error bars represent SEM. WC=WC main effect, MMW=MMW main effect, INT=interaction effect.

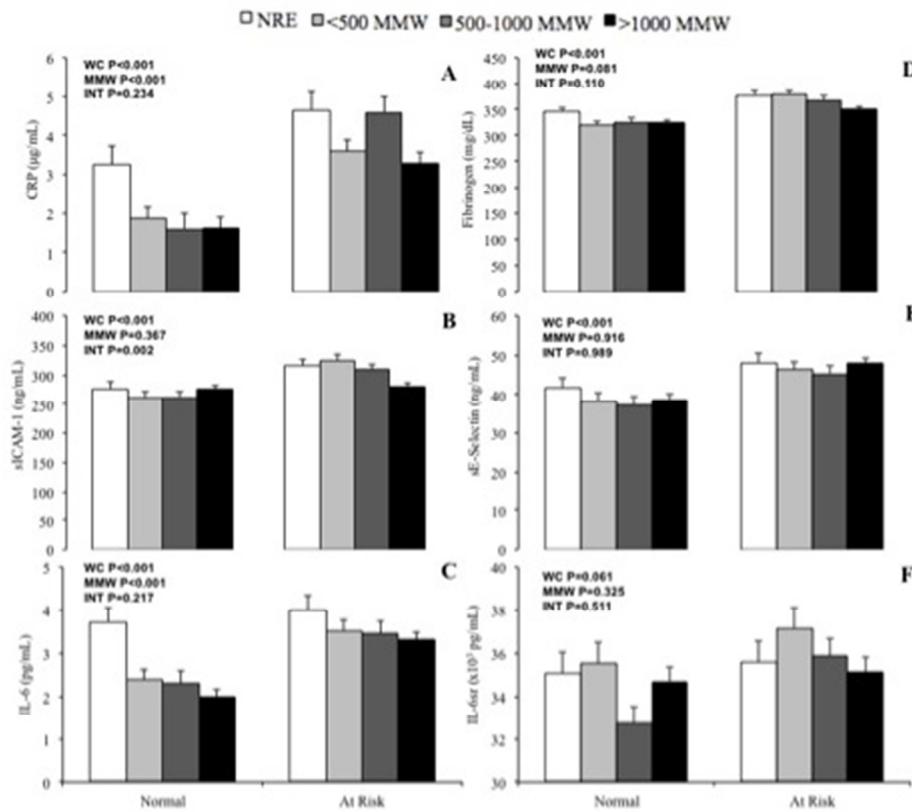

Supplemental Figure 1. Waist Circumference (WC), MET Minutes per Week (MMW) and Inflammatory Markers. Data from 1255 men and women in MIDUS. Joint association of WC category (normal [ $\geq 102.0$  cm for men and  $\geq 88.0$  cm for women], at risk [ $> 102.0$  cm for men and  $> 88.0$  cm for women]) and MMW category (no regular exercise,  $< 500$  MMW, 500-1000 MMW and  $> 1000$  MMW) for CRP (A), sICAM-1 (B), IL-6 (C), fibrinogen (D), sE-Selectin (E) and IL-6sr (F). These analyses were adjusted for age, sex, smoking and relevant medication use. Error bars represent SEM. WC=WC main effect, MMW=MMW main effect, INT=interaction effect.

165x147mm (72 x 72 DPI)

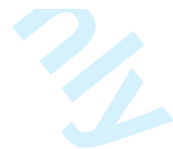

|             | IL-6    | IL-6sr  | Fibrinogen | CRP     | sE-Selectin |
|-------------|---------|---------|------------|---------|-------------|
| IL-6        |         |         |            |         |             |
| IL-6sr      | 0.037   |         |            |         |             |
| Fibrinogen  | 0.417** | 0.017   |            |         |             |
| CRP         | 0.514** | 0.053   | 0.513**    |         |             |
| sE-Selectin | 0.213** | 0.035   | 0.104**    | 0.156** |             |
| sICAM-1     | 0.134** | 0.140** | 0.092**    | 0.144** | 0.041       |

**Supplemental Table 1. Correlations of Inflammatory Biomarkers.** IL-6 = Interleukin-6, IL-6sr = IL-6 soluble receptor, CRP = C-reactive protein, sE-Selectin = soluble E-Selectin and sICAM-1 = soluble intracellular adhesion molecule - 1. \* denotes significance at  $p \leq 0.05$ , \*\* denotes significance at  $p \leq 0.001$ .



**Contributions of Body Mass Index and Exercise Habits on  
Inflammatory Markers: A Cohort Study of Middle Aged  
Adults Living in the United States**

|                                    |                                                                                   |
|------------------------------------|-----------------------------------------------------------------------------------|
| Journal:                           | <i>BMJ Open</i>                                                                   |
| Manuscript ID:                     | bmjopen-2013-002623.R2                                                            |
| Article Type:                      | Research                                                                          |
| Date Submitted by the Author:      | 08-Apr-2013                                                                       |
| Complete List of Authors:          | Strohacker, Kelley<br>McCaffery, Jeanne<br>wing, rena                             |
| <b>Primary Subject<br>Heading</b>: | Epidemiology                                                                      |
| Secondary Subject Heading:         | Immunology (including allergy)                                                    |
| Keywords:                          | Immunology < BASIC SCIENCES, EPIDEMIOLOGY, Public health <<br>INFECTIOUS DISEASES |
|                                    |                                                                                   |

SCHOLARONE™  
Manuscripts

1  
2  
3 1 **Contributions of Body Mass Index and Exercise Habits on Inflammatory Markers: A**  
4 2 **Cohort Study of Middle Aged Adults Living in the United States**  
5  
6 3  
7 4  
8 5

9 6 Kelley Strohacker, Ph.D.<sup>a</sup>, Rena R. Wing, Ph.D.<sup>a</sup>, and Jeanne M. McCaffery, Ph.D.<sup>a</sup>  
10 7  
11 8  
12 9

13  
14 10 <sup>a</sup>The Miriam Hospital and the Warren Alpert Medical School of Brown University, Providence  
15 11 RI  
16 12  
17 13  
18 14  
19

20  
21 15 Corresponding Author  
22

23 16 Jeanne M. McCaffery, Ph.D.  
24

25  
26 17 Associate Professor of Psychiatry and Human Behavior (Research)  
27

28 18 The Miriam Hospital Weight Control and Diabetes Research Center  
29

30 19 196 Richmond Street  
31

32  
33 20 Providence, RI 02904  
34

35 21 Phone: (401) 793-8010  
36

37 22 Fax: (401) 793-8944  
38

39  
40 23 Email: JMccaffery@lifespan.org  
41

42 24  
43  
44 25  
45  
46 26 Running Title:  
47

48  
49 27 BMI, Physical Activity and Inflammation  
50  
51 28

52  
53  
54 29 **Key Words:** MIDUS, Intracellular Adhesion Molecule-1, Fibrinogen, C-Reactive Protein  
55

56 30 **Word Count: 3931**  
57  
58  
59  
60

31

|                                                                                                                                                                                                                                                                                                                                                                                                                                                                                                                                                                                                                                                                                                                                                                         |    |
|-------------------------------------------------------------------------------------------------------------------------------------------------------------------------------------------------------------------------------------------------------------------------------------------------------------------------------------------------------------------------------------------------------------------------------------------------------------------------------------------------------------------------------------------------------------------------------------------------------------------------------------------------------------------------------------------------------------------------------------------------------------------------|----|
| <b>ARTICLE SUMMARY</b>                                                                                                                                                                                                                                                                                                                                                                                                                                                                                                                                                                                                                                                                                                                                                  | 32 |
| <b>Article focus</b>                                                                                                                                                                                                                                                                                                                                                                                                                                                                                                                                                                                                                                                                                                                                                    | 33 |
| <ul style="list-style-type: none"> <li>• Systemic inflammation is related to the progression of cardiovascular disease.</li> </ul>                                                                                                                                                                                                                                                                                                                                                                                                                                                                                                                                                                                                                                      | 34 |
| <ul style="list-style-type: none"> <li>• Independent of obesity, physical activity is inversely related to concentrations of well-established inflammatory biomarkers, such as C-reactive protein (CRP) or interleukin-6 (IL-6).</li> </ul>                                                                                                                                                                                                                                                                                                                                                                                                                                                                                                                             | 35 |
| <ul style="list-style-type: none"> <li>• This article evaluates interactive effects of body mass index and physical activity on established inflammatory markers, CRP, IL-6, and emerging inflammatory markers, fibrinogen, soluble intracellular adhesion molecule (sICAM)-1, soluble E-selectin, and IL-6 soluble receptor.</li> </ul>                                                                                                                                                                                                                                                                                                                                                                                                                                | 36 |
|                                                                                                                                                                                                                                                                                                                                                                                                                                                                                                                                                                                                                                                                                                                                                                         | 37 |
|                                                                                                                                                                                                                                                                                                                                                                                                                                                                                                                                                                                                                                                                                                                                                                         | 38 |
| <b>Key messages</b>                                                                                                                                                                                                                                                                                                                                                                                                                                                                                                                                                                                                                                                                                                                                                     | 39 |
| <ul style="list-style-type: none"> <li>• Interactive effects of body mass index and physical activity were observed for CRP, such that regular physical activity reported by overweight individuals was related to significantly lower CRP levels compared to those reported no regular activity.</li> </ul>                                                                                                                                                                                                                                                                                                                                                                                                                                                            | 40 |
|                                                                                                                                                                                                                                                                                                                                                                                                                                                                                                                                                                                                                                                                                                                                                                         | 41 |
| <ul style="list-style-type: none"> <li>• Independent of BMI, regular physical activity was related to lower IL-6, with a trend for lower fibrinogen</li> </ul>                                                                                                                                                                                                                                                                                                                                                                                                                                                                                                                                                                                                          | 42 |
| <ul style="list-style-type: none"> <li>• Physical activity had no independent effect on circulating markers related to endothelial inflammation, such as sICAM-1 or sE-selectin.</li> </ul>                                                                                                                                                                                                                                                                                                                                                                                                                                                                                                                                                                             | 43 |
|                                                                                                                                                                                                                                                                                                                                                                                                                                                                                                                                                                                                                                                                                                                                                                         | 44 |
| <b>Strengths and limitations</b>                                                                                                                                                                                                                                                                                                                                                                                                                                                                                                                                                                                                                                                                                                                                        | 45 |
| <ul style="list-style-type: none"> <li>• 1254 adults from the National Survey of Midlife Development in the United States (MIDUS) Biomarker Project were analyzed. Statistical analyses were adjusted for age, sex, smoking, and relevant medication use. A strength of this paper is categorizing physical activity levels based on national recommendations. This data may be used to determine appropriate levels of physical activity necessary for reducing inflammation in overweight and obese adults. However, cross-sectional data is limited, as causal inferences cannot be obtained. A second limitation is that the sample was predominantly comprised of non-Hispanic white individuals, therefore findings may not extend to all ethnicities.</li> </ul> | 46 |
|                                                                                                                                                                                                                                                                                                                                                                                                                                                                                                                                                                                                                                                                                                                                                                         | 47 |
|                                                                                                                                                                                                                                                                                                                                                                                                                                                                                                                                                                                                                                                                                                                                                                         | 48 |
|                                                                                                                                                                                                                                                                                                                                                                                                                                                                                                                                                                                                                                                                                                                                                                         | 49 |
|                                                                                                                                                                                                                                                                                                                                                                                                                                                                                                                                                                                                                                                                                                                                                                         | 50 |
|                                                                                                                                                                                                                                                                                                                                                                                                                                                                                                                                                                                                                                                                                                                                                                         | 51 |
|                                                                                                                                                                                                                                                                                                                                                                                                                                                                                                                                                                                                                                                                                                                                                                         | 52 |

53



1  
2  
3 54  
4  
5  
6 55**ABSTRACT**

7  
8 **Objectives.** Determine whether body mass index (BMI) and physical activity (PA) above, at or  
9  
10 below MET-minute per week (MMW) levels recommended in the 2008 Physical Activity  
11  
12 Guidelines interact or have additive effects on interleukin (IL)-6, C-reactive protein (CRP),  
13  
14 fibrinogen, IL-6 soluble receptor (IL-6sr), soluble E-selectin and soluble intracellular adhesion  
15  
16 molecule (sICAM)-1.  
17  
18  
19

20 **Design.** Archived cohort data (N=1254, age 54.5±11.7y, BMI 29.8±6.6kg/m<sup>2</sup>) from the  
21  
22 National Survey of Midlife Development in the United States (MIDUS) Biomarkers Study were  
23  
24 analyzed for concentrations of inflammatory markers using general linear models. MMW was  
25  
26 defined as no regular exercise, <500 MMW, 500-1000 MMW, >1000 MMW and BMI was  
27  
28 defined as <25, 25-29.9, ≥30 kg/m<sup>2</sup>. Analyses were adjusted for age, sex, smoking and relevant  
29  
30 medication use.  
31  
32  
33

34 **Setting.** Respondents reported to three centers to complete questionnaires and provide blood  
35  
36 samples.  
37  
38

39 **Participants.** Participants were men and women currently enrolled in the MIDUS Biomarker  
40  
41 Project (N=1254, 93% non-hispanic white, average age 54.5y).  
42  
43

44 **Primary Outcome Measures.** Concentration of serum IL-6, CRP, fibrinogen, IL-6sr, sE-  
45  
46 selectin and sICAM.  
47  
48

49 **Results.** Significant interactions were found between BMI and MMW for CRP and sICAM-1  
50  
51 (P's<0.05). CRP in overweight individuals was similar to obese when no PA was reported, but  
52  
53 was similar to normal weight when any level of regular PA was reported. sICAM-1 was  
54  
55  
56  
57  
58  
59  
60

1  
2  
3 76 differentially lower in obese individuals who reported >1000 MMW compared to obese  
4  
5  
6 77 individuals reporting less exercise.  
7

8 **Conclusion.** The association of exercise with CRP and sICAM-1 differed by BMI, suggesting  
9  
10 79 that regular exercise may buffer weight-associated elevations in CRP in overweight individuals  
11  
12 80 while higher levels of exercise may be necessary to reduce sICAM-1 or CRP in obese  
13  
14  
15 81 individuals.

16  
17 82 **Trial Registry.** N/A.  
18  
19  
20 83

## 21 22 84 **INTRODUCTION**

23  
24 85 Obesity paired with low physical activity is well known to increase morbidity and mortality  
25  
26 86 related to cardiovascular disease (CVD)(1). It is less clear, however, whether the benefits of  
27  
28  
29 87 higher levels of physical activity differ among normal weight, overweight, and obese individuals.  
30

31  
32 88 Chronic, low-grade inflammation, marked by elevations in cytokines, acute phase  
33  
34 89 reactants and soluble adhesion molecules, is a developing CVD risk factor(2, 3). Circulating  
35  
36 90 Interleukin-6 (IL-6) and, C-reactive protein (CRP) are both considered established inflammatory  
37  
38 91 markers related to CVD(3). Fibrinogen, soluble intracellular adhesion molecule (sICAM-1) and  
39  
40 92 soluble e-selectin (sE-selectin) also have key roles in the progression of CVD and have been  
41  
42  
43 93 associated with elevated risk(4-6). Obesity is strongly associated with greater concentrations of  
44  
45 94 inflammatory markers(7, 8). Further, body fat distribution is also an important factor relating to  
46  
47 95 inflammatory status. Accumulation of fat in visceral depots is more strongly associated with  
48  
49 96 low-grade inflammation compared to accumulation of fat in subcutaneous or hip-region depots(9,  
50  
51 97 10).  
52  
53  
54  
55  
56  
57  
58  
59  
60

1  
2  
3 98 The effects of physical activity on markers of inflammation are more complex and may  
4  
5 99 vary depending on body weight. A number of epidemiological studies have shown an inverse  
6  
7  
8 100 relationship between physical activity and CRP and IL-6, independent of obesity(11-16).  
9  
10 101 Laboratory studies conducted in aerobically trained, typically normal weight, individuals have  
11  
12 102 demonstrated that a single bout of exercise stimulates IL-6 release from skeletal muscle, which  
13  
14 103 promotes anti-inflammatory effects (17-19), as opposed to adipose tissue-derived IL-6 that is  
15  
16 104 associated with pro-inflammatory effects (20). Randomized controlled trials have also been  
17  
18 105 conducted, often in populations that also tend to be overweight or obese, to examine the effects  
19  
20 106 of aerobic exercise interventions on inflammation and the results are mixed (21). Thus, the  
21  
22 107 contribution of physical activity to inflammation in the context of obesity remains unclear.  
23  
24  
25  
26

27 108 The purpose of our study was to disentangle the relative contributions of BMI and  
28  
29 109 physical activity recorded in MET-minutes per week (MMW) to circulating levels of IL-6, IL-6sr,  
30  
31 110 CRP, sICAM-1 and sE-selectin in middle-aged adults. MMW categories for this study were  
32  
33 111 determined using values put forth by the Physical Activity Guidelines for Americans, which  
34  
35 112 states that total weekly physical activity in the range of 500-1000 MET-minutes (approximately  
36  
37 113 equivalent to 150-300 minutes of moderate or 75-150 minutes of vigorous activity per week)  
38  
39 114 produces substantial health benefits for adults(22). We hypothesized that BMI and MMW would  
40  
41 115 interact, such that greater MMW reported would lessen the impact of obesity on markers of  
42  
43 116 inflammation.  
44  
45  
46  
47

48 117

## 49 118 **MATERIALS AND METHODS**

50  
51  
52  
53 119 **Design and Sample.** This study was a cross-sectional analysis of archived data (BMI,  
54  
55 120 self-reported physical activity and inflammatory biomarker concentrations) from 1254  
56  
57  
58  
59  
60

1  
2  
3 121 respondents who provided consent (as approved by The University of Wisconsin Madison Health  
4  
5 122 Sciences Institutional Review Board) and were subsequently enrolled in the National Survey of  
6  
7 123 Midlife Development in the United States (MIDUS) Biomarkers Study (23). The Biomarker  
8  
9 124 Project was one of 5 projects within MIDUS II, with the purpose of adding comprehensive  
10  
11 125 biological assessments on a subsample of the MIDUS participants to further understand age-  
12  
13 126 related differences in physical and mental health. Participants were eligible for The Biomarker  
14  
15 127 Project if they were previously enrolled in MIDUS and MIDUS II, which recruited non-  
16  
17 128 institutionalized, English-speaking adults residing in the contiguous United States aged 25-74.  
18  
19 129 Exclusion criteria included non-participation in MIDUS and MIDUS II and unwillingness to  
20  
21 130 travel to specified sites for biomarker assessment. The random digit dialing sample for the  
22  
23 131 parent study was selected from working telephone banks and a list of all individuals between the  
24  
25 132 ages of 25 and 74 years within each household was generated in order to select a random  
26  
27 133 respondent. Those who agreed to participate in the Biomarker Study stayed overnight at one of  
28  
29 134 three General Clinical Research Centers: University of California Los Angeles, University of  
30  
31 135 Wisconsin-Madison and Georgetown University. Upon arrival, each respondent provided a  
32  
33 136 detailed medical history (including physical activity levels) and provided all prescription, over-  
34  
35 137 the-counter, and alternative medications to be inventoried by project staff. Following an  
36  
37 138 overnight stay, morning fasting blood samples were obtained. Cohorts were assessed between  
38  
39 139 July 2004 and May 2009 as a follow up to MIDUS I respondents that were previously surveyed  
40  
41 140 by the MacArthur Midlife Research Network between 1995 and 1996. Based on the MIDUS  
42  
43 141 Biomarker Project sample of 1254 participants, 80% power was estimated to detect small effect  
44  
45 142 sizes ( $\delta=0.08$  and higher) with an alpha level at 0.05 for a two-tailed test (24, 25).  
46  
47  
48  
49  
50  
51  
52  
53  
54  
55  
56  
57  
58  
59  
60

1  
2  
3 143        **Anthropometrics.** Height was measured in centimeters and recorded to the nearest  
4  
5  
6 144 millimeter. A single measure of WC was taken directly on the skin or over a single layer of light,  
7  
8 145 close-fitting clothing at the narrowest point between ribs and the iliac crest in centimeters to the  
9  
10 146 nearest millimeter. Weight was measured in kilograms and BMI was calculated by dividing  
11  
12 147 body mass in kilograms by height in meters squared. BMI categories were organized into 3  
13  
14  
15 148 groups: normal weight (BMI  $\leq 24.9$  kg/m<sup>2</sup>), overweight (BMI  $\geq 25-29.9$ ) and obese (BMI  $\geq 30$ ).

17  
18 149        **Categorizing Physical Activity by MET-Minutes per Week (MMW).**

19  
20 150        The MMW variable was calculated using data provided in the medical history form. The  
21  
22 151 form first described 3 types of regular physical activity(23):

23  
24  
25 152        **Vigorous:** Which causes your heart to beat so rapidly you can feel it in your chest  
26  
27 153 and you perform it long enough to work up a good sweat and breathe heavily (e.g.,  
28  
29 154 competitive sports, running, vigorous swimming, high intensity aerobics, digging  
30  
31 155 in the garden, or lifting heavy objects).

32  
33  
34 156        **Moderate:** Which causes your heart rate to increase slightly and you typically  
35  
36 157 work up a sweat (e.g., leisurely sports like light tennis, slow or light swimming,  
37  
38 158 low intensity aerobics or golfing without a power cart, brisk walking, mowing the  
39  
40 159 lawn with a walking lawnmower).

41  
42  
43 160        **Light:** Which requires little physical effort (e.g., light housekeeping like dusting  
44  
45 161 or laundry, bowling, archery, easy walking, golfing with a power cart or fishing).

46  
47  
48 162 Keeping these definitions in mind, participants were asked if they engaged in regular physical  
49  
50 163 activity of any type for 20 minutes or more at least 3 times per week (yes or no). If participants  
51  
52 164 answered “yes”, they entered up to 7 types of seasonal and/or non-seasonal exercise or activity  
53  
54 165 along with the frequency, duration and intensity.

1  
2  
3 166 MMW were calculated in a 2-step process. Step 1: subjects who reported no physical  
4  
5  
6 167 activity (for whom no MMW calculations could be made) were designated as the no regular  
7  
8 168 exercise group (NRE). Step 2: For subjects who indicated that they performed regular physical  
9  
10 169 activity, total MMW were calculated by multiplying minutes per week by intensity level (1.1 for  
11  
12 170 low, 3.0 for moderate and 6.0 for vigorous) and summed across each non-seasonal activity  
13  
14 171 reported. Four groups reflecting participation in physical activity and whether or not their  
15  
16 172 participation was below, at or above USDHHS guidelines were created: NRE (reported no  
17  
18 173 regular physical activity), below recommended (reported <500 MMW), recommended (reported  
19  
20 174 500-1000 MMW) and above recommended (reported >1000 MMW).  
21  
22  
23

24 175 **Blood Collection, Processing and Assays.** Participants were asked to avoid strenuous  
25  
26 176 activity the day of blood collection. Venous blood samples were collected in 10 mL serum  
27  
28 177 separator vacutainers following a 12-h overnight fast and processed at a General Clinical  
29  
30 178 Research Center using standardized procedures. Blood samples were not collected at any  
31  
32 179 specific point during the menstrual cycle in female participants. Briefly, following collection,  
33  
34 180 vacutainers were allowed to stand 15-30-min (2-h maximum) prior to centrifugation at 4°C for  
35  
36 181 20-min at 2000-3000 rpm. Serum samples were frozen and shipped to the MIDUS Biocore Lab  
37  
38 182 and treated and/or analyzed for inflammation markers (IL-6, IL-6sr, CRP, fibrinogen, sE-  
39  
40 183 Selectin and sICAM-1).  
41  
42  
43  
44  
45

46 184 IL-6 and IL-6sr were assayed in the MIDUS Biocore Laboratory (University of Madison,  
47  
48 185 Madison WI) using Quantikine® High-sensitivity ELISA kits (cat# HS600B and cat# DR600,  
49  
50 186 R&D Systems, Minneapolis, MN). Plates were read at 490 and 450 nm, respectively for IL-6  
51  
52 187 and IL-6sr using a Dynex MRXe plate reader (Magellan Biosciences, Chantilly, VA). Intra-  
53  
54  
55  
56  
57  
58  
59  
60

1  
2  
3 188 assay and inter-assay precision (CV%) for IL-6 was approximately 4.1% and 13.0%. CV%  
4  
5 189 values for IL-6sr were 5.9-5.7% and 2.0%, respectively.  
6  
7

8 190 Assays for sICAM-1, sE-Selectin, fibrinogen and CRP were performed at the Laboratory  
9  
10 191 for Clinical Biochemistry Research (University of Vermont, Burlington, VT). Measurement of  
11  
12 192 sICAM-1 was completed using an ELISA assay (Parameter-Human sICAM-1 Immunoassay;  
13  
14  
15 193 R&D Systems). Inter-assay precision for sICAM-1 was 5.0%. Measurement of sE-selectin was  
16  
17 194 completed using a high-sensitivity ELISA assay (Parameter Human sE-Selectin Immunoassay,  
18  
19 195 R&D Systems). Intra-assay and inter-assay precision for sE-selectin was 4.7-5.0% and 5.7-8.8%,  
20  
21 196 respectively. Fibrinogen was measured using the BNII nephelometer (N Antiserum to Human  
22  
23 197 Fibrinogen; Dade Behring Inc., Deerfield, IL). Intra-assay and inter-assay precision for  
24  
25 198 fibrinogen was 2.7% and 2.6%, respectively. CRP was analyzed using a BNII nephelometer  
26  
27 199 with a particle enhanced immunonephelometric assay. Intra-assay and inter-assay precision for  
28  
29 200 CRP was 2.3-4.4% and 2.1-5.7%, respectively.  
30  
31  
32  
33

34 201 **Statistical Analyses.** All variables were assessed for normality and non-normal data  
35  
36 202 were log transformed, which included data for CRP, IL-6, IL-6sr, fibrinogen, sE-selectin and  
37  
38 203 sICAM-1. General Linear Models were performed to determine the relationship of MMW and  
39  
40 204 BMI with the inflammatory markers. For each outcome, the ordinal MMW and BMI factors  
41  
42 205 were entered as independent factors with an interaction term. If the interaction term was not  
43  
44 206 significant, the interaction term was dropped and the model was re-fit for main effects only.  
45  
46 207 Pairwise comparisons were assessed using post hoc univariate analyses with a Bonferroni  
47  
48 208 adjustment for multiple comparisons. Covariates for all models included factors that are known  
49  
50 209 to affect inflammatory status: age, sex, smoking and relevant medications (cholesterol-lowering,  
51  
52 210 corticosteroids, anti-diabetic, antidepressant, hormone replacement and hormonal contraceptive).  
53  
54  
55  
56  
57  
58  
59  
60

1  
2  
3 211 Race was initially included as a covariate; however, approximately 200 data points were lost in  
4  
5 212 the analyses due to incomplete racial data. As race was not found to be a predictor of our  
6  
7 213 dependent variables, with the exception of sICAM-1, race was excluded as a covariate to  
8  
9 214 increase samples size in all analyses excluding sICAM-1. All statistical analyses were  
10  
11 215 performed with SPSS v. 17 (Chicago, IL) and statistical significance was set  $\alpha = 0.05$ .  
12  
13  
14

15 216 In an exploratory analysis, we examined whether the relative effects of BMI and MMW  
16  
17 217 on the inflammatory markers differed by sex in 3-way interaction models. As none of the  
18  
19 218 interactions approached statistical significance (data not shown), sex was retained as a covariate  
20  
21 219 in the models.  
22  
23  
24  
25  
26  
27  
28

29  
30  
31  
32  
33  
34  
35  
36  
37  
38  
39  
40  
41  
42  
43  
44  
45  
46  
47  
48  
49  
50

## 222 RESULTS

31 223 **Subject Characteristics.** Table 1 presents anthropometric characteristics and circulating  
32  
33 224 levels of inflammatory biomarkers in all subjects (N=1254). Subjects were 92.6% non-Hispanic  
34  
35 225 white, 56.8% female, and, on average, middle-aged and overweight. Of all the respondents,  
36  
37 226 14.9% were currently smoked, 27.8% were taking cholesterol lowering medication, 12.1%  
38  
39 227 corticosteroids, 10.4% anti-diabetic medication, 14.2% antidepressant medication, 7.3%  
40  
41 228 hormone replacement and 2.5% oral contraceptives. The percentage of participants with missing  
42  
43 229 data for each variable were as follows: 1.6% for CRP, 1.0% for sICAM-1, 1.0% for IL-6, 1.6%  
44  
45 230 for fibrinogen, 1.2% for sE-selectin, and 1.0% for IL-6sr.  
46  
47  
48  
49  
50

51 231 **CRP (Figure 1, Panel A).** We found a significant interaction between BMI and MMW  
52  
53 232 for CRP concentration ( $F=3.022$ ,  $P=0.006$ ). In post hoc comparisons, CRP levels were higher in  
54  
55 233 overweight and obese subjects compared to normal weight subjects among those who reported  
56  
57  
58  
59  
60



1  
2  
3 234 no regular exercise ( $P$ 's<0.001). However, among subjects who reported any amount of regular  
4  
5 235 exercise (<500, 500-1000 or >1000 MMW), CRP levels were significantly greater only in obese  
6  
7  
8 236 subjects compared to both normal weight and overweight subjects ( $P$ 's <0.01). In obese  
9  
10 237 individuals, CRP tended to be lower in those reporting >1000 MMW compared to those  
11  
12  
13 238 reporting no regular exercise ( $P$ =0.053).

14  
15 239 We also found main effects of BMI ( $F$ =130.873  $P$ <0.001) and MMW ( $F$ =11.576,  
16  
17 240  $P$ <0.001) on CRP. CRP was significantly greater with each increasing BMI category, in a dose-  
18  
19  
20 241 dependent manner ( $P$ 's<0.001). Compared to participants who reported no regular exercise,  
21  
22 242 CRP was significantly lower in those who reported 500-1000 and >1000 MMW ( $P$ 's <0.01),  
23  
24  
25 243 with a trend for lower CRP in those who reported <500 MMW of regular exercise ( $P$ =0.078).

26  
27 244 **sICAM-1 (Figure 1, Panel B).** We found a significant interaction between BMI and  
28  
29 245 MMW for sICAM-1 concentration ( $F$ =2.701,  $P$ =0.013). Levels of sICAM-1 were significantly  
30  
31  
32 246 lower in obese subjects who reported >1000 MMW compared to obese subjects who reported no  
33  
34 247 regular exercise ( $P$ =0.014) and <500 MMW ( $P$ =0.026) and tended to be lower than levels in  
35  
36 248 obese subjects who reported 500-1000 MMW ( $P$ =0.079). No differences in sICAM-1 by MMW  
37  
38  
39 249 were observed among normal weight or overweight individuals.

40  
41 250 We also observed a main effect of BMI ( $F$ =6.060,  $P$ =0.002), such that sICAM-1 levels in  
42  
43 251 obese participants were significantly higher than levels found in both normal weight and  
44  
45  
46 252 overweight participants ( $P$ 's<0.01). No significant main effect of MMW was found for sICAM-1  
47  
48 253 ( $F$ =0.931,  $P$ =0.425).

49  
50 254 **IL-6 (Figure 1, Panel C).** Both BMI and MMW had independent effects on circulating  
51  
52 255 concentrations of IL-6 (BMI:  $F$ =60.150,  $P$ <0.001, MMW:  $F$ =10.680,  $P$ <0.001), with no  
53  
54  
55 256 significant interaction ( $F$ =1.21,  $P$ =0.297). We found a dose-dependent effect of BMI, such that  
56  
57  
58  
59  
60

1  
2  
3 257 higher BMI levels were associated with significantly greater IL-6 ( $P$ 's<0.001). Independent of  
4  
5 258 BMI, IL-6 was significantly lower in subjects who reported regular exercise (<500 MMW, 500-  
6  
7 259 1000 MMW and >1000 MMW) compared to those who reported no regular exercise ( $P$ 's <0.01)  
8  
9 260 with no difference between levels of MMW.  
10  
11

12 261 **Fibrinogen (Figure 1, Panel D).** BMI significantly contributed to circulating levels of  
13  
14 262 fibrinogen ( $F=42.385$ ,  $P<0.001$ ), such that dose-dependent increases were observed for all BMI  
15  
16 263 levels ( $P$ 's<0.01). While we observed a trend for lower fibrinogen with regular physical activity,  
17  
18 264 similar to that of IL-6, the effect did not reach statistical significance ( $F=2.187$ ,  $P=0.088$ ). We  
19  
20 265 observed no significant interaction between BMI and MMW for fibrinogen ( $F=1.680$ ,  $P=0.122$ ).  
21  
22  
23

24 266 **sE-Selectin (1, Panel E).** BMI significantly contributed to circulating levels of sE-  
25  
26 267 selectin ( $F=28.253$ ,  $P<0.001$ ) with no significant contribution by MMW ( $F=0.207$ ,  $P=0.892$ ).  
27  
28 268 Dose-dependent increases in sE-selectin were also observed across BMI levels ( $P$ 's<0.01). We  
29  
30 269 observed no significant interaction between BMI and MMW for sE-selectin ( $F=0.570$ ,  $P=0.755$ ).  
31  
32  
33

34 270 **IL-6sr (Figure 1, Panel F).** No significant main effects for BMI ( $F=1.783$ ,  $P=0.169$ ),  
35  
36 271 MMW ( $F=1.434$ ,  $P=0.231$ ) or their interaction ( $F=0.834$ ,  $P=0.544$ ) were detected for IL-6sr.  
37  
38

39 272 **Waist Circumference (WC) and Inflammatory Markers (Supplemental Figure 1).** A  
40  
41 273 secondary analysis was completed using WC and MMW as independent variables and the  
42  
43 274 complete results of these analyses are located in the supplemental information. Briefly, we  
44  
45 275 found a significant interaction between WC and MMW on sICAM-1. In individuals with an at-  
46  
47 276 risk WC ( $\geq 102.0$  cm for men and  $\geq 88.0$  cm for women), sICAM-1 was significantly lower in  
48  
49 277 those reporting 1000+ MMW compared to less than 500 MMW and tended to be lower in those  
50  
51 278 reporting no regular exercise. Overall, main effects were similar to those found for BMI and  
52  
53 279 MMW analyses. Having an at-risk WC was independently related to higher levels of CRP,  
54  
55  
56  
57  
58  
59  
60

1  
2  
3 280 sICAM-1, IL-6, fibrinogen and sE-selectin. Independent of WC, any level of regular exercise  
4  
5  
6 281 was related to lower levels of CRP, IL-6 with a similar tendency for fibrinogen.  
7  
8 282

9  
10 283 **DISCUSSION**  
11

12  
13 284 The current study aimed to determine whether the impact of BMI and MMW on  
14  
15 285 inflammatory markers varied by level of overweight or obesity. For CRP and s-ICAM-1  
16  
17 286 regular physical activity appeared to diminish the effects of higher BMI compared to those who  
18  
19 287 reported no regular physical activity. In addition, we found that BMI was strongly and  
20  
21 288 independently related to greater concentrations of both established and emerging inflammatory  
22  
23 289 markers that may increase CVD risk. Independent of BMI, regular physical activity was also  
24  
25 290 associated with lower IL-6, with a similar trend for fibrinogen. These results suggest that,  
26  
27 291 although obesity has a clear impact on inflammation, physical activity appears to mitigate at least  
28  
29 292 some of this effect.  
30  
31  
32

33  
34 293 For example, overweight individuals had CRP levels that were similar to levels observed  
35  
36 294 in obese individuals if they reported no regular exercise (4.05 and 4.83  $\mu\text{g}/\text{mL}$ , respectively).  
37  
38 295 CRP levels greater than 3  $\mu\text{g}/\text{mL}$  are typically associated with high CVD risk(26). In overweight  
39  
40 296 subjects who reported regular physical activity of at least 3, 20-minute sessions per week (be it  
41  
42 297 below [ $<500$ ], within [ $500-1000$ ] or above [ $>1000$ ] USDHHS MMW recommendations), CRP  
43  
44 298 levels were lower and not significantly different from CRP levels found in normal weight  
45  
46 299 participants (). This suggests that increasing physical activity level to a minimum of 3 days per  
47  
48 300 week, at least 20 minutes per day, may improve CRP profiles among overweight individuals.  
49  
50

51  
52 301 Obese individuals may require a higher level of regular physical activity in order to lower  
53  
54 302 inflammatory markers. While obese subjects also had greater levels of CRP and sICAM-1  
55  
56  
57  
58  
59  
60

1  
2  
3 303 compared to lean and overweight subjects, those who reported >1000 MMW (above the  
4  
5 304 USDHHS recommendation) had lower levels of sICAM-1 and tended to have lower CRP than  
6  
7  
8 305 obese subjects reporting no regular physical activity. Taken together, we may speculate that  
9  
10 306 while physical activity levels currently recommended for the general population may reduce  
11  
12 307 particular inflammatory makers in overweight populations, obese populations may require  
13  
14 308 greater levels of physical activity above recommended values to reduce inflammatory markers  
15  
16 309 like CRP and sICAM-1.  
17  
18  
19

20 310 As expected, strong main effects of BMI were observed for CRP, IL-6, fibrinogen,  
21  
22 311 sICAM-1 and sE-selectin, in agreement with previous work (27-30). Independent of BMI effects,  
23  
24 312 our results suggest that physical activity has differentiating effects on inflammatory markers.  
25  
26 313 Individuals reporting no regular physical activity had higher levels of IL-6 with a tendency for  
27  
28 314 higher fibrinogen, compared to those reporting any level of regular physical activity (<500, 500-  
29  
30 315 1000 or >1000 MMW). Similar results have been observed in the MONItoring trends and  
31  
32 316 determinants in Cardiovascular disease (MONICA) study(31), the National Health and Nutrition  
33  
34 317 Examination Survey (NHANES III)(12, 14) and the Multi-Ethnic Study of Atherosclerosis  
35  
36 318 (MESA)(32), such that both increased frequency and intensity of physical activity have been  
37  
38 319 related to lower IL-6 and fibrinogen. Our findings add to these prior results by standardizing  
39  
40 320 levels of physical activity by using USDHHS. Our results suggest that, regular physical activity  
41  
42 321 at any level (<500, 500-1000, >1000) appears to be associated with lower levels of IL-6 and  
43  
44 322 possibly fibrinogen, independent of BMI.  
45  
46  
47  
48  
49

50 323 Although IL-6 produced in hypertrophied adipose tissue(33, 34) initiates the acute phase  
51  
52 324 response, marked by the release of hepatic CRP (35, 36), an interaction between BMI and  
53  
54 325 physical activity was detected for CRP, but not IL-6. While IL-6 and CRP were significantly  
55  
56  
57  
58  
59  
60

1  
2  
3 326 correlated ( $r=0.514$ , see Supplemental Table 1), this correlation suggests that IL-6 levels do not  
4  
5 327 fully explain CRP levels at any given moment. Further, CRP is a more stable biomarker, owing  
6  
7  
8 328 to its substantially longer plasma half-life (37), which may improve our ability to detect  
9  
10 329 interaction effects in CRP compared to IL-6.

11  
12  
13 330 Interestingly, our results also suggest that regular exercise may have a more profound  
14  
15 331 impact on lowering classical markers of inflammation and less impact on the inflammatory status  
16  
17 332 of the endothelium. Regular physical activity has reliably been associated with lower levels of  
18  
19  
20 333 IL-6 and CRP, both classical inflammatory markers related to adipose and systemic  
21  
22 334 inflammation(38). However, regular exercise appeared to have no independent impact on  
23  
24  
25 335 markers of endothelial activation, particularly sE-selectin. Higher levels of exercise were related  
26  
27 336 to lower sICAM-1 in obese individuals only. In one prior study, inverse relationships between  
28  
29 337 physical activity and sICAM-1 and sE-selectin were reported in drug-treated hypertensive men  
30  
31  
32 338 (39). Thus, further research is necessary to understand mechanisms underlying differential  
33  
34 339 associations of exercise with systemic and endothelial inflammation.

35  
36 340 Several limitations must be addressed. First, the cross-sectional design does not allow us  
37  
38  
39 341 to infer causal relationships. Prospective and interventional designs are necessary to confirm our  
40  
41 342 findings. No objective measures of physical activity were available in the MIDUS sample.  
42  
43 343 Therefore, the use of self-report physical activity data may have diminished our ability to detect  
44  
45  
46 344 effects. However, in addition to being in line with previous studies using self-report physical  
47  
48 345 activity, our findings are also in line with previous studies(40, 41) that demonstrated that higher  
49  
50 346 cardiorespiratory fitness, as measured by indirect calorimetry, was associated with lower levels  
51  
52  
53 347 of inflammation independent of visceral adiposity or BMI. Another limitation is that the sample  
54  
55 348 was predominantly comprised of non-Hispanic white individuals, suggesting that findings may

1  
2  
3 349 not extend to all ethnicities. Finally, BMI and physical activity variables are correlated,  
4  
5  
6 350 potentially raising the concern of small sample sizes in specific groups crossed by BMI and  
7  
8 351 MMW. However, the smallest group for analyses still contained 54 individuals (normal weight  
9  
10 352 individuals reporting no exercise).

11  
12  
13 353 In summary, our results demonstrate both interactive and independent influences of BMI  
14  
15 354 and levels of physical activity on both established and emerging markers of inflammation.  
16  
17 355 Inflammation is both a consequence of obesity and a mechanism promoting CVD. Regular  
18  
19  
20 356 physical activity appears to mitigate the effects of higher BMI on some inflammatory markers,  
21  
22 357 particularly CRP, which is strongly implicated in CVD. Importantly, while any level of regular  
23  
24 358 physical activity may help reduce inflammation in overweight individuals, similar effects in  
25  
26  
27 359 obese individuals may require levels of physical activity that are greater than currently  
28  
29 360 recommended by the USDHHS for general health.

30  
31 361

32 362

33  
34 363

35  
36 364

37  
38 365

39  
40 366

41  
42 367

43  
44 368

45  
46 369

47  
48 370

49  
50 371

51  
52

53  
54

55  
56

57  
58  
59  
60

1  
2  
3 3724  
5 3736  
7 3748  
9 37510  
11 37612  
13 37714  
15 37816  
17 37918  
19 38020  
21  
22  
23  
24 381 **ACKNOWLEDGEMENTS**25  
26  
27 382 We thank the staff of the Clinical Research Centers at the University of Wisconsin-Madison,28  
29 383 UCLA, and Georgetown University for their effort in conducting the original data collection.30  
31  
32 38433  
34 385 **FUNDING**35  
36 386 KS was supported through a T32 Training Fellowship (Training in Behavioral and Preventive37  
38 387 Medicine; T32 HL076134). The original research was supported by a grant from the National39  
40 388 Institute on Aging (P01-AG020166) to conduct a longitudinal follow-up of the MIDUS (Midlife41  
42 389 in the U.S.) Investigation.43  
44  
45  
46 39047  
48 391 The original study was supported by the John D. and Catherine T. MacArther Foundation49  
50 392 Research Network on Successful Midlife Development and by the following grants: M01-51  
52 393 RR023942 (Georgetown), M01-RR00865 (UCLA) from the General Clinical Research Centers53  
54  
55  
56  
57  
58  
59  
60

1  
2  
3 394 Program and 1UL1RR025011 (UW) from the Clinical and Translational Science Award (CTSA)  
4  
5 395 program of the National Center for Research Resources, National Institutes of Health.  
6  
7

8 396

9  
10 397 **CONFLICTS OF INTEREST**

11  
12 398 The authors declare no conflict of interest.  
13  
14

15 399

16  
17 400 **CONTRIBUTORSHIP**

18  
19  
20 401 KS, JMM and RRW each made substantial contributions to the conception and design of the  
21  
22 402 study, data acquisition, analysis and interpretation, as well as to drafting and revision for  
23  
24 403 substantial intellectual content. All authors made final approval of the version to be published.  
25  
26

27 404 **DATA SHARING STATEMENT**

28  
29 405 Data and documentation for MIDUS studies are available at the Inter-university Consortium for  
30  
31 406 Political and Social Research (ICPSR). <http://www.icpsr.umich.edu/icpsrweb/landing.jsp>  
32  
33

34 407

35  
36 408

37  
38 409

39  
40 410

41  
42 411

43  
44 412

45  
46 413

47  
48 414

49  
50 415

51  
52 416

53  
54  
55  
56  
57  
58  
59  
60



1  
2  
3 4174  
5 4186  
7  
8 4199  
10 42011  
12 42113  
14 42215  
16 42317  
18 42419  
20 42521  
22 42623  
24  
25  
26  
27 427 **REFERENCES**28  
29 428 1. Blair SN, Brodney S. Effects of physical inactivity and obesity on morbidity and  
30 429 mortality: current evidence and research issues. *Med Sci Sports Exerc.* 1999;31(11 Suppl):S646-31  
32 430 62. Epub 1999/12/11.33  
34  
35  
36 431 2. Hotamisligil GS. Inflammation and metabolic disorders. *Nature.* 2006;444(7121):860-7.37  
38 432 Epub 2006/12/15.39  
40 433 3. Koenig W, Khuseyinova N, Baumert J, et al. Increased concentrations of C-reactive41  
42 434 protein and IL-6 but not IL-18 are independently associated with incident coronary events in43  
44 435 middle-aged men and women: results from the MONICA/KORA Augsburg case-cohort study,45  
46 436 1984-2002. *Arterioscler Thromb Vasc Biol.* 2006;26(12):2745-51. Epub 2006/09/30.47  
48 437 4. Papageorgiou N, Tousoulis D, Siasos G, et al. Is fibrinogen a marker of inflammation in49  
50 438 coronary artery disease? *Hellenic J Cardiol.* 2010;51(1):1-9. Epub 2010/02/02.51  
52  
53  
54  
55  
56  
57  
58  
59  
60

- 1  
2  
3 439 5. Schmidt C, Hulthe J, Fagerberg B. Baseline ICAM-1 and VCAM-1 are increased in  
4  
5  
6 440 initially healthy middle-aged men who develop cardiovascular disease during 6.6 years of  
7  
8 441 follow-up. *Angiology*. 2009;60(1):108-14. Epub 2008/05/28.
- 9  
10 442 6. Demerath E, Towne B, Blangero J, et al. The relationship of soluble ICAM-1, VCAM-1,  
11  
12 443 P-selectin and E-selectin to cardiovascular disease risk factors in healthy men and women. *Ann*  
14  
15 444 *Hum Biol*. 2001;28(6):664-78. Epub 2001/12/01.
- 16  
17 445 7. Rocha VZ, Libby P. Obesity, inflammation, and atherosclerosis. *Nat Rev Cardiol*.  
18  
19 446 2009;6(6):399-409. Epub 2009/04/29.
- 20  
21 447 8. Calabro P, Yeh ET. Obesity, inflammation, and vascular disease: the role of the adipose  
22  
23 448 tissue as an endocrine organ. *Subcell Biochem*. 2007;42:63-91. Epub 2007/07/07.
- 24  
25 449 9. Pou KM, Massaro JM, Hoffmann U, et al. Visceral and subcutaneous adipose tissue  
26  
27 450 volumes are cross-sectionally related to markers of inflammation and oxidative stress: the  
28  
29 451 Framingham Heart Study. *Circulation*. 2007;116(11):1234-41. Epub 2007/08/22.
- 30  
31 452 10. Mathieu P, Poirier P, Pibarot P, et al. Visceral obesity: the link among inflammation,  
32  
33 453 hypertension, and cardiovascular disease. *Hypertension*. 2009;53(4):577-84. Epub 2009/02/25.
- 34  
35 454 11. Reuben DB, Judd-Hamilton L, Harris TB, et al. The associations between physical  
36  
37 455 activity and inflammatory markers in high-functioning older persons: MacArthur Studies of  
38  
39 456 Successful Aging. *J Am Geriatr Soc*. 2003;51(8):1125-30. Epub 2003/08/02.
- 40  
41 457 12. King DE, Carek P, Mainous AG, 3rd, et al. Inflammatory markers and exercise:  
42  
43 458 differences related to exercise type. *Med Sci Sports Exerc*. 2003;35(4):575-81. Epub 2003/04/04.
- 44  
45 459 13. Wannamethee SG, Lowe GD, Whincup PH, et al. Physical activity and hemostatic and  
46  
47 460 inflammatory variables in elderly men. *Circulation*. 2002;105(15):1785-90. Epub 2002/04/17.
- 48  
49  
50  
51  
52  
53  
54  
55  
56  
57  
58  
59  
60

- 1  
2  
3 461 14. Abramson JL, Vaccarino V. Relationship between physical activity and inflammation  
4  
5 462 among apparently healthy middle-aged and older US adults. *Arch Intern Med*.  
6  
7 463 2002;162(11):1286-92. Epub 2002/06/01.
- 8  
9  
10 464 15. Geffken DF, Cushman M, Burke GL, et al. Association between physical activity and  
11  
12 465 markers of inflammation in a healthy elderly population. *Am J Epidemiol*. 2001;153(3):242-50.  
13  
14 466 Epub 2001/02/07.
- 15  
16  
17 467 16. Taaffe DR, Harris TB, Ferrucci L, et al. Cross-sectional and prospective relationships of  
18  
19 468 interleukin-6 and C-reactive protein with physical performance in elderly persons: MacArthur  
20  
21 469 studies of successful aging. *J Gerontol A Biol Sci Med Sci*. 2000;55(12):M709-15. Epub  
22  
23 470 2000/12/29.
- 24  
25  
26  
27 471 17. Starkie R, Ostrowski SR, Jauffred S, et al. Exercise and IL-6 infusion inhibit endotoxin-  
28  
29 472 induced TNF-alpha production in humans. *FASEB J*. 2003;17(8):884-6. Epub 2003/03/11.
- 30  
31  
32 473 18. Pedersen BK, Steensberg A, Fischer C, et al. Exercise and cytokines with particular focus  
33  
34 474 on muscle-derived IL-6. *Exerc Immunol Rev*. 2001;7:18-31. Epub 2001/10/03.
- 35  
36  
37 475 19. Pedersen BK, Steensberg A, Fischer C, et al. The metabolic role of IL-6 produced during  
38  
39 476 exercise: is IL-6 an exercise factor? *Proc Nutr Soc*. 2004;63(2):263-7. Epub 2004/08/06.
- 40  
41 477 20. Trayhurn P, Wood IS. Adipokines: inflammation and the pleiotropic role of white  
42  
43 478 adipose tissue. *Br J Nutr*. 2004;92(3):347-55. Epub 2004/10/08.
- 44  
45  
46 479 21. Beavers KM, Brinkley TE, Nicklas BJ. Effect of exercise training on chronic  
47  
48 480 inflammation. *Clin Chim Acta*. 2010;411(11-12):785-93. Epub 2010/03/02.
- 49  
50  
51 481 22. USDHHS, editor. 2008 Physical Activity Guidelines for Americans. Washington  
52  
53 482 DC2008.
- 54  
55  
56  
57  
58  
59  
60

- 1  
2  
3 483 23. C Ryff DA, JS Ayanian, DS carr, et al. National Survey of Midlife Development in the  
4  
5 484 United State (MIDUS II), 2004-2006. Inter-university Consortium for Political and Social  
6  
7 485 Research (ICPSR) [distrubutor]. 2011.  
8  
9  
10 486 24. Kraemer H. How Many Subjects? Statistical Power Analysis in Research: SAGE  
11  
12 487 Publications, Inc; 1987.  
13  
14  
15 488 25. Cohen J. Statistical Power Analysis for the Behavioral Sciences. Second ed: Lawrence  
16  
17 489 Erlbaum Associates; 1998.  
18  
19  
20 490 26. Bassuk SS, Rifai N, Ridker PM. High-sensitivity C-reactive protein: clinical importance.  
21  
22 491 Curr Probl Cardiol. 2004;29(8):439-93. Epub 2004/07/20.  
23  
24  
25 492 27. Park HS, Park JY, Yu R. Relationship of obesity and visceral adiposity with serum  
26  
27 493 concentrations of CRP, TNF-alpha and IL-6. Diabetes Res Clin Pract. 2005;69(1):29-35. Epub  
28  
29 494 2005/06/16.  
30  
31  
32 495 28. Bastard JP, Jardel C, Bruckert E, et al. Elevated levels of interleukin 6 are reduced in  
33  
34 496 serum and subcutaneous adipose tissue of obese women after weight loss. J Clin Endocrinol  
35  
36 497 Metab. 2000;85(9):3338-42. Epub 2000/09/22.  
37  
38  
39 498 29. Ditschuneit HH, Flechtner-Mors M, Adler G. Fibrinogen in obesity before and after  
40  
41 499 weight reduction. Obes Res. 1995;3(1):43-8. Epub 1995/01/01.  
42  
43  
44 500 30. Straczkowski M, Lewczuk P, Dzienis-Straczkowska S, et al. Elevated soluble  
45  
46 501 intercellular adhesion molecule-1 levels in obesity: relationship to insulin resistance and tumor  
47  
48 502 necrosis factor-alpha system activity. Metabolism. 2002;51(1):75-8. Epub 2002/01/10.  
49  
50  
51 503 31. Autenrieth C, Schneider A, Doring A, et al. Association between different domains of  
52  
53 504 physical activity and markers of inflammation. Med Sci Sports Exerc. 2009;41(9):1706-13. Epub  
54  
55 505 2009/08/07.  
56  
57  
58  
59  
60

- 1  
2  
3 506 32. Majka DS, Chang RW, Vu TH, et al. Physical activity and high-sensitivity C-reactive  
4  
5 507 protein: the multi-ethnic study of atherosclerosis. *Am J Prev Med.* 2009;36(1):56-62. Epub  
6  
7 508 2008/11/18.
- 8  
9  
10 509 33. Day CP. From fat to inflammation. *Gastroenterology.* 2006;130(1):207-10. Epub  
11  
12 510 2006/01/13.
- 13  
14  
15 511 34. Fain JN, Madan AK, Hiler ML, et al. Comparison of the release of adipokines by adipose  
16  
17 512 tissue, adipose tissue matrix, and adipocytes from visceral and subcutaneous abdominal adipose  
18  
19 513 tissues of obese humans. *Endocrinology.* 2004;145(5):2273-82. Epub 2004/01/17.
- 20  
21  
22 514 35. Castell JV, Gomez-Lechon MJ, David M, et al. Interleukin-6 is the major regulator of  
23  
24 515 acute phase protein synthesis in adult human hepatocytes. *FEBS Lett.* 1989;242(2):237-9. Epub  
25  
26 516 1989/01/02.
- 27  
28  
29 517 36. Heinrich PC, Castell JV, Andus T. Interleukin-6 and the acute phase response. *Biochem J.*  
30  
31 518 1990;265(3):621-36. Epub 1990/02/01.
- 32  
33  
34 519 37. Pradhan AD, Manson JE, Rifai N, et al. C-reactive protein, interleukin 6, and risk of  
35  
36 520 developing type 2 diabetes mellitus. *JAMA.* 2001;286(3):327-34. Epub 2001/07/24.
- 37  
38  
39 521 38. Mathieu P, Lemieux I, Despres JP. Obesity, inflammation, and cardiovascular risk. *Clin*  
40  
41 522 *Pharmacol Ther.* 2010;87(4):407-16. Epub 2010/03/05.
- 42  
43  
44 523 39. Hjelstuen A, Anderssen SA, Holme I, et al. Markers of inflammation are inversely related  
45  
46 524 to physical activity and fitness in sedentary men with treated hypertension. *Am J Hypertens.*  
47  
48 525 2006;19(7):669-75; discussion 76-7. Epub 2006/07/04.
- 49  
50  
51 526 40. Church TS, Barlow CE, Earnest CP, et al. Associations between cardiorespiratory fitness  
52  
53 527 and C-reactive protein in men. *Arterioscler Thromb Vasc Biol.* 2002;22(11):1869-76. Epub  
54  
55 528 2002/11/12.
- 56  
57  
58  
59  
60

1  
2  
3 529 41. Arsenault BJ, Cartier A, Cote M, et al. Body composition, cardiorespiratory fitness, and  
4  
5 530 low-grade inflammation in middle-aged men and women. *Am J Cardiol.* 2009;104(2):240-6.  
6  
7  
8 531 Epub 2009/07/07.  
9

10 532

11  
12 533

13  
14 534

15  
16 535

17  
18 536

19  
20  
21  
22 537 **FIGURE AND TABLE LEGENDS**

23  
24 538

25  
26 539

27  
28  
29 540 **Figure 1: Inflammatory Markers.** Data from 1254 men and women in MIDUS. Joint  
30  
31 541 association of BMI category (normal, overweight and obese) and MMW category (no regular  
32  
33 542 exercise, <500 MMW, 500-1000 MMW and >1000 MMW) for CRP (A), sICAM-1 (B), IL-6 (C),  
34  
35 543 fibrinogen (D), sE-Selectin (E) and IL-6sr (F). These analyses were adjusted for age, sex,  
36  
37 544 smoking and relevant medication use. The analysis for sICAM-1 was further adjusted for race.  
38  
39 545 Error bars represent SEM. BMI=BMI main effect P value, MMW=MMW main effect P value,  
40  
41 546 INT=interaction effect P value.  
42  
43  
44  
45

46 547

47  
48 548

49  
50 549 **Table 1: Subject Characteristics.** BMI = body mass index; CRP = C-reactive protein; IL =  
51  
52 550 interleukin; IL-6sr = IL-6 soluble receptor; MMW = MET-Minutes per Week; sE-Selectin =  
53  
54 551 soluble E-Selectin; sICAM-1= soluble intracellular adhesion molecule-1.  
55  
56  
57  
58  
59  
60

| <b>Demographic</b>          | <b>BMI &lt; 25<br/>N=298</b> | <b>BMI 25-29.9<br/>N=440</b> | <b>BMI ≥30<br/>N=516</b> | <b>Overall<br/>N = 1254</b> |
|-----------------------------|------------------------------|------------------------------|--------------------------|-----------------------------|
| <b>Variables</b>            | <b>Mean ± SD</b>             |                              |                          |                             |
| Age (years)                 | 54.6 ± 12.8                  | 56.4 ± 11.7                  | 54.6 ± 11.2              | 54.5 ± 11.7                 |
| Gender (%)                  |                              |                              |                          |                             |
| Male                        | 31.2                         | 52.7                         | 42.1                     | 43.20                       |
| Female                      | 68.8                         | 47.3                         | 57.9                     | 56.80                       |
| Race (%)                    |                              |                              |                          |                             |
| Non-Hispanic White          | 94.0                         | 94.0                         | 90.3                     | 92.60                       |
| Hispanic                    | 0.4                          | 0.8                          | 0.3                      | 0.05                        |
| African American            | 1.9                          | 1.6                          | 4.0                      | 2.60                        |
| Asian/Pacific Islander      | 0.7                          | 0.3                          | 0.0                      | 0.30                        |
| Native American             | 1.1                          | 0.8                          | 2.0                      | 1.30                        |
| Other                       | 1.9                          | 2.6                          | 3.5                      | 2.30                        |
| Medication Use (%)          |                              |                              |                          |                             |
| Cholesterol-Lowering        | 13.1                         | 32.3                         | 32.6                     | 27.80                       |
| Corticosteroids             | 12.8                         | 12.5                         | 11.4                     | 12.10                       |
| Anti-Diabetic               | 4.7                          | 8.4                          | 15.3                     | 10.40                       |
| Antidepressant              | 14.4                         | 13.4                         | 16.9                     | 14.2                        |
| Hormone Replacement Therapy | 9.4                          | 8.6                          | 5.0                      | 7.3                         |
| Oral Contraceptive          | 3.7                          | 3.4                          | 1.0                      | 2.5                         |
| Currently Smoking           | 17.8                         | 14.1                         | 14.0                     | 14.90                       |
| BMI (kg/m <sup>2</sup> )    | 22.7 ± 1.8                   | 27.4 ± 1.4                   | 35.9 ± 5.7               | 29.8 ± 6.6                  |
| IL-6 (pg/mL)                | 2.4 ± 3.1                    | 2.7 ± 2.48                   | 3.7 ± 3.2                | 3.0 ± 3.1                   |
| IL-6sr (pg/mL)              | 34473.1 ± 10861.9            | 35337.4 ± 10065.1            | 35475.7 ± 10325.7        | 35184.7 ± 10359.1           |
| CRP (µg/mL)                 | 1.5 ± 2.5                    | 2.5 ± 4.0                    | 4.4 ± 5.9                | 3.0 ± 4.8                   |
| Fibrinogen (mg/dL)          | 315.8 ± 75.9                 | 343.2 ± 82.1                 | 373 ± 92.1               | 348.9 ± 87.9                |
| sE-Selectin (ng/mL)         | 36.9 ± 19.6                  | 41.2 ± 20.6                  | 49.1 ± 24.7              | 43.4 ± 22.7                 |
| sICAM-1 (ng/mL)             | 284.8 ± 122.0                | 276.2 ± 99.9                 | 301.4 ± 123.1            | 288.6 ± 115.6               |

552

553

1  
2  
3 1 **Contributions of Body Mass Index and Exercise Habits on Inflammatory Markers: A**  
4 2 **Cohort Study of Middle Aged Adults Living in the United States**  
5 3  
6 4  
7 5  
8 6

9 Kelley Strohacker, Ph.D.<sup>a</sup>, Rena R. Wing, Ph.D.<sup>a</sup>, and Jeanne M. McCaffery, Ph.D.<sup>a</sup>  
10 7  
11 8  
12 9

13 10 <sup>a</sup>The Miriam Hospital and the Warren Alpert Medical School of Brown University, Providence  
14 11 RI  
15 12  
16 13  
17 14

18  
19  
20  
21 15 Corresponding Author  
22 16

23 17 Jeanne M. McCaffery, Ph.D.  
24 18

25 19 Associate Professor of Psychiatry and Human Behavior (Research)  
26 20  
27 21

28 22 The Miriam Hospital Weight Control and Diabetes Research Center  
29 23

30 24 196 Richmond Street  
31 25

32 26 Providence, RI 02904  
33 27

34 28 Phone: (401) 793-8010  
35 29

36 30 Fax: (401) 793-8944  
37 31

38 32 Email: JMccaffery@lifespan.org  
39 33  
40 34  
41 35  
42 36  
43 37  
44 38  
45 39  
46 40  
47 41  
48 42  
49 43  
50 44  
51 45  
52 46  
53 47  
54 48  
55 49  
56 50  
57 51  
58 52  
59 53  
60 54

56 26 Running Title:

57 27 BMI, Physical Activity and Inflammation  
58 28

59 29 **Key Words:** MIDUS, Intracellular Adhesion Molecule-1, Fibrinogen, C-Reactive Protein  
60 30

**Word Count: 3931**



31 **ABSTRACT**

32 **Objectives.** Determine whether body mass index (BMI) and physical activity (PA) above, at or  
33 below MET-minute per week (MMW) levels recommended in the 2008 Physical Activity  
34 Guidelines interact or have additive effects on interleukin (IL)-6, C-reactive protein (CRP),  
35 fibrinogen, IL-6 soluble receptor (IL-6sr), soluble E-selectin and soluble intracellular adhesion  
36 molecule (sICAM)-1. **Design.** Archived cohort data (N=1254, age 54.5±11.7y, BMI  
37 29.8±6.6kg/m<sup>2</sup>) from the National Survey of Midlife Development in the United States (MIDUS)  
38 Biomarkers Study were analyzed for concentrations of inflammatory markers using general  
39 linear models. MMW was defined as no regular exercise, <500 MMW, 500-1000 MMW, >1000  
40 MMW and BMI was defined as <25, 25-29.9, ≥30 kg/m<sup>2</sup>. Analyses were adjusted for age, sex,  
41 smoking and relevant medication use. **Setting.** Respondents reported to three centers to  
42 complete questionnaires and provide blood samples. **Participants.** Participants were men and  
43 women currently enrolled in the MIDUS Biomarker Project (N=1254, 93% non-hispanic white,  
44 average age 54.5y). **Primary Outcome Measures.** Concentration of serum IL-6, CRP,  
45 fibrinogen, IL-6sr, sE-selectin and sICAM. **Results.** Significant interactions were found  
46 between BMI and MMW for CRP and sICAM-1 (P's<0.05). CRP in overweight individuals was  
47 similar to obese when no PA was reported, but was similar to normal weight when any level of  
48 regular PA was reported. sICAM-1 was differentially lower in obese individuals who reported  
49 >1000 MMW compared to obese individuals reporting less exercise. **Conclusion.** The  
50 association of exercise with CRP and sICAM-1 differed by BMI, suggesting that regular exercise  
51 may buffer weight-associated elevations in CRP in overweight individuals while higher levels of  
52 exercise may be necessary to reduce sICAM-1 or CRP in obese individuals. **Trial Registry.**  
53 N/A.

## 54 INTRODUCTION

55 Obesity paired with low physical activity is well known to increase morbidity and mortality  
56 related to cardiovascular disease (CVD)(1). It is less clear, however, whether the benefits of  
57 higher levels of physical activity differ among normal weight, overweight, and obese individuals.

58 Chronic, low-grade inflammation, marked by elevations in cytokines, acute phase  
59 reactants and soluble adhesion molecules, is a developing CVD risk factor(2, 3). Circulating  
60 Interleukin-6 (IL-6) and, C-reactive protein (CRP) are both considered established inflammatory  
61 markers related to CVD(3). Fibrinogen, soluble intracellular adhesion molecule (sICAM-1) and  
62 soluble e-selectin (sE-selectin) also have key roles in the progression of CVD and have been  
63 associated with elevated risk(4-6). Obesity is strongly associated with greater concentrations of  
64 inflammatory markers(7, 8). Further, body fat distribution is also an important factor relating to  
65 inflammatory status. Accumulation of fat in visceral depots is more strongly associated with  
66 low-grade inflammation compared to accumulation of fat in subcutaneous or hip-region depots(9,  
67 10).

68 The effects of physical activity on markers of inflammation are more complex and may  
69 vary depending on body weight. A number of epidemiological studies have shown an inverse  
70 relationship between physical activity and CRP and IL-6, independent of obesity(11-16).

71 Laboratory studies conducted in aerobically trained, typically normal weight, individuals have  
72 demonstrated that a single bout of exercise stimulates IL-6 release from skeletal muscle, which  
73 promotes anti-inflammatory effects (17-19), as opposed to adipose tissue-derived IL-6 that is  
74 associated with pro-inflammatory effects (20). Randomized controlled trials have also been  
75 conducted, often in populations that also tend to be overweight or obese, to examine the effects

1  
2  
3 76 of aerobic exercise interventions on inflammation and the results are mixed (21). Thus, the  
4  
5 77 contribution of physical activity to inflammation in the context of obesity remains unclear.  
6  
7

8 78 The purpose of our study was to disentangle the relative contributions of BMI and  
9  
10 79 physical activity recorded in MET-minutes per week (MMW) to circulating levels of IL-6, IL-6sr,  
11  
12 80 CRP, sICAM-1 and sE-selectin in middle-aged adults. MMW categories for this study were  
13  
14 81 determined using values put forth by the Physical Activity Guidelines for Americans, which  
15  
16 82 states that total weekly physical activity in the range of 500-1000 MET-minutes (approximately  
17  
18 83 equivalent to 150-300 minutes of moderate or 75-150 minutes of vigorous activity per week)  
19  
20 84 produces substantial health benefits for adults(22). We hypothesized that BMI and MMW would  
21  
22 85 interact, such that greater MMW reported would lessen the impact of obesity on markers of  
23  
24 86 inflammation.  
25  
26  
27  
28

29 87

## 30 31 88 **MATERIALS AND METHODS**

32  
33  
34 89 **Design and Sample.** This study was a cross-sectional analysis of archived data (BMI,  
35  
36 90 self-reported physical activity and inflammatory biomarker concentrations) from 1254  
37  
38 91 respondents who provided consent (as approved by The University of Wisconsin Madison Health  
39  
40 92 Sciences Institutional Review Board) and were subsequently enrolled in the National Survey of  
41  
42 93 Midlife Development in the United States (MIDUS) Biomarkers Study (23). The Biomarker  
43  
44 94 Project was one of 5 projects within MIDUS II, with the purpose of adding comprehensive  
45  
46 95 biological assessments on a subsample of the MIDUS participants to further understand age-  
47  
48 96 related differences in physical and mental health. Participants were eligible for The Biomarker  
49  
50 97 Project if they were previously enrolled in MIDUS and MIDUS II, which recruited non-  
51  
52 98 institutionalized, English-speaking adults residing in the contiguous United States aged 25-74.  
53  
54  
55  
56  
57  
58  
59  
60

1  
2  
3 99 Exclusion criteria included non-participation in MIDUS and MIDUS II and unwillingness to  
4  
5  
6 100 travel to specified sites for biomarker assessment. The random digit dialing sample for the  
7  
8 101 parent study was selected from working telephone banks and a list of all individuals between the  
9  
10 102 ages of 25 and 74 years within each household was generated in order to select a random  
11  
12 103 respondent. Those who agreed to participate in the Biomarker Study stayed overnight at one of  
13  
14 104 three General Clinical Research Centers: University of California Los Angeles, University of  
15  
16 105 Wisconsin-Madison and Georgetown University. Upon arrival, each respondent provided a  
17  
18 106 detailed medical history (including physical activity levels) and provided all prescription, over-  
19  
20 107 the-counter, and alternative medications to be inventoried by project staff. Following an  
21  
22 108 overnight stay, morning fasting blood samples were obtained. Cohorts were assessed between  
23  
24 109 July 2004 and May 2009 as a follow up to MIDUS I respondents that were previously surveyed  
25  
26 110 by the MacArthur Midlife Research Network between 1995 and 1996. Based on the MIDUS  
27  
28 111 Biomarker Project sample of 1254 participants, 80% power was estimated to detect small effect  
29  
30 112 sizes ( $\delta=0.08$  and higher) with an alpha level at 0.05 for a two-tailed test (24, 25).  
31  
32  
33  
34  
35

36 113 **Anthropometrics.** Height was measured in centimeters and recorded to the nearest  
37  
38 114 millimeter. A single measure of WC was taken directly on the skin or over a single layer of light,  
39  
40 115 close-fitting clothing at the narrowest point between ribs and the iliac crest in centimeters to the  
41  
42 116 nearest millimeter. Weight was measured in kilograms and BMI was calculated by dividing  
43  
44 117 body mass in kilograms by height in meters squared. BMI categories were organized into 3  
45  
46 118 groups: normal weight ( $BMI \leq 24.9 \text{ kg/m}^2$ ), overweight ( $BMI \geq 25-29.9$ ) and obese ( $BMI \geq 30$ ).  
47  
48  
49

50 119 **Categorizing Physical Activity by MET-Minutes per Week (MMW).**

51 120 The MMW variable was calculated using data provided in the medical history form. The  
52  
53 121 form first described 3 types of regular physical activity(23):  
54  
55  
56  
57  
58  
59  
60

1  
2  
3 122 **Vigorous:** Which causes your heart to beat so rapidly you can feel it in your chest  
4  
5 123 and you perform it long enough to work up a good sweat and breathe heavily (e.g.,  
6  
7  
8 124 competitive sports, running, vigorous swimming, high intensity aerobics, digging  
9  
10 125 in the garden, or lifting heavy objects).

11  
12 126 **Moderate:** Which causes your heart rate to increase slightly and you typically  
13  
14 127 work up a sweat (e.g., leisurely sports like light tennis, slow or light swimming,  
15  
16 128 low intensity aerobics or golfing without a power cart, brisk walking, mowing the  
17  
18 129 lawn with a walking lawnmower).

19  
20 130 **Light:** Which requires little physical effort (e.g., light housekeeping like dusting  
21  
22 131 or laundry, bowling, archery, easy walking, golfing with a power cart or fishing).

23  
24  
25 132 Keeping these definitions in mind, participants were asked if they engaged in regular physical  
26  
27 133 activity of any type for 20 minutes or more at least 3 times per week (yes or no). If participants  
28  
29 134 answered “yes”, they entered up to 7 types of seasonal and/or non-seasonal exercise or activity  
30  
31 135 along with the frequency, duration and intensity.

32  
33  
34 136 MMW were calculated in a 2-step process. Step 1: subjects who reported no physical  
35  
36 137 activity (for whom no MMW calculations could be made) were designated as the no regular  
37  
38 138 exercise group (NRE). Step 2: For subjects who indicated that they performed regular physical  
39  
40 139 activity, total MMW were calculated by multiplying minutes per week by intensity level (1.1 for  
41  
42 140 low, 3.0 for moderate and 6.0 for vigorous) and summed across each non-seasonal activity  
43  
44 141 reported. Four groups reflecting participation in physical activity and whether or not their  
45  
46 142 participation was below, at or above USDHHS guidelines were created: NRE (reported no  
47  
48 143 regular physical activity), below recommended (reported <500 MMW), recommended (reported  
49  
50 144 500-1000 MMW) and above recommended (reported >1000 MMW).

1  
2  
3 145 **Blood Collection, Processing and Assays.** Participants were asked to avoid strenuous  
4  
5  
6 146 activity the day of blood collection. Venous blood samples were collected in 10 mL serum  
7  
8 147 separator vacutainers following a 12-h overnight fast and processed at a General Clinical  
9  
10 148 Research Center using standardized procedures. Blood samples were not collected at any  
11  
12 149 specific point during the menstrual cycle in female participants. Briefly, following collection,  
13  
14 150 vacutainers were allowed to stand 15-30-min (2-h maximum) prior to centrifugation at 4°C for  
15  
16 151 20-min at 2000-3000 rpm. Serum samples were frozen and shipped to the MIDUS Biocore Lab  
17  
18 152 and treated and/or analyzed for inflammation markers (IL-6, IL-6sr, CRP, fibrinogen, sE-  
19  
20 153 Selectin and sICAM-1).

21  
22 154 IL-6 and IL-6sr were assayed in the MIDUS Biocore Laboratory (University of Madison,  
23  
24 155 Madison WI) using Quantikine® High-sensitivity ELISA kits (cat# HS600B and cat# DR600,  
25  
26 156 R&D Systems, Minneapolis, MN). Plates were read at 490 and 450 nm, respectively for IL-6  
27  
28 157 and IL-6sr using a Dynex MRXe plate reader (Magellan Biosciences, Chantilly, VA). Intra-  
29  
30 158 assay and inter-assay precision (CV%) for IL-6 was approximately 4.1% and 13.0%. CV%  
31  
32 159 values for IL-6sr were 5.9-5.7% and 2.0%, respectively.

33  
34 160 Assays for sICAM-1, sE-Selectin, fibrinogen and CRP were performed at the Laboratory  
35  
36 161 for Clinical Biochemistry Research (University of Vermont, Burlington, VT). Measurement of  
37  
38 162 sICAM-1 was completed using an ELISA assay (Parameter-Human sICAM-1 Immunoassay;  
39  
40 163 R&D Systems). Inter-assay precision for sICAM-1 was 5.0%. Measurement of sE-selectin was  
41  
42 164 completed using a high-sensitivity ELISA assay (Parameter Human sE-Selectin Immunoassay,  
43  
44 165 R&D Systems). Intra-assay and inter-assay precision for sE-selectin was 4.7-5.0% and 5.7-8.8%,  
45  
46 166 respectively. Fibrinogen was measured using the BNII nephelometer (N Antiserum to Human  
47  
48 167 Fibrinogen; Dade Behring Inc., Deerfield, IL). Intra-assay and inter-assay precision for  
49  
50  
51  
52  
53  
54  
55  
56  
57  
58  
59  
60

1  
2  
3 168 fibrinogen was 2.7% and 2.6%, respectively. CRP was analyzed using a BNII nephelometer  
4  
5  
6 169 with a particle enhanced immunonephelometric assay. Intra-assay and inter-assay precision for  
7  
8 170 CRP was 2.3-4.4% and 2.1-5.7%, respectively.  
9

10 **Statistical Analyses.** All variables were assessed for normality and non-normal data  
11  
12 were log transformed, which included data for CRP, IL-6, IL-6sr, fibrinogen, sE-selectin and  
13  
14 sICAM-1. General Linear Models were performed to determine the relationship of MMW and  
15  
16  
17 174 BMI with the inflammatory markers. For each outcome, the ordinal MMW and BMI factors  
18  
19 were entered as independent factors with an interaction term. If the interaction term was not  
20  
21 significant, the interaction term was dropped and the model was re-fit for main effects only.  
22  
23  
24 177 Pairwise comparisons were assessed using post hoc univariate analyses with a Bonferroni  
25  
26 adjustment for multiple comparisons. Covariates for all models included factors that are known  
27  
28 to affect inflammatory status: age, sex, smoking and relevant medications (cholesterol-lowering,  
29  
30 179 corticosteroids, anti-diabetic, antidepressant, hormone replacement and hormonal contraceptive).  
31  
32 180 Race was initially included as a covariate; however, approximately 200 data points were lost in  
33  
34 181 the analyses due to incomplete racial data. As race was not found to be a predictor of our  
35  
36 182 dependent variables, with the exception of sICAM-1, race was excluded as a covariate to  
37  
38 increase sample size in all analyses excluding sICAM-1. All statistical analyses were  
39  
40 184 performed with SPSS v. 17 (Chicago, IL) and statistical significance was set  $\alpha = 0.05$ .  
41  
42  
43  
44 185

45  
46 186 In an exploratory analysis, we examined whether the relative effects of BMI and MMW  
47  
48 187 on the inflammatory markers differed by sex in 3-way interaction models. As none of the  
49  
50 188 interactions approached statistical significance (data not shown), sex was retained as a covariate  
51  
52 189 in the models.  
53  
54

55 190  
56  
57  
58  
59  
60

191

192 **RESULTS**

193 **Subject Characteristics.** Table 1 presents anthropometric characteristics and circulating  
194 levels of inflammatory biomarkers in all subjects (N=1254). Subjects were 92.6% non-Hispanic  
195 white, 56.8% female, and, on average, middle-aged and overweight. Of all the respondents,  
196 14.9% were currently smoked, 27.8% were taking cholesterol lowering medication, 12.1%  
197 corticosteroids, 10.4% anti-diabetic medication, 14.2% antidepressant medication, 7.3%  
198 hormone replacement and 2.5% oral contraceptives. The percentage of participants with missing  
199 data for each variable were as follows: 1.6% for CRP, 1.0% for sICAM-1, 1.0% for IL-6, 1.6%  
200 for fibrinogen, 1.2% for sE-selectin, and 1.0% for IL-6sr.

201 **CRP (Figure 1, Panel A).** We found a significant interaction between BMI and MMW  
202 for CRP concentration (F=3.022, P=0.006). In post hoc comparisons, CRP levels were higher in  
203 overweight and obese subjects compared to normal weight subjects among those who reported  
204 no regular exercise (P's<0.001). However, among subjects who reported any amount of regular  
205 exercise (<500, 500-1000 or >1000 MMW), CRP levels were significantly greater only in obese  
206 subjects compared to both normal weight and overweight subjects (P's <0.01). In obese  
207 individuals, CRP tended to be lower in those reporting >1000 MMW compared to those  
208 reporting no regular exercise (P=0.053).

209 We also found main effects of BMI (F=130.873 P<0.001) and MMW (F=11.576,  
210 P<0.001) on CRP. CRP was significantly greater with each increasing BMI category, in a dose-  
211 dependent manner (P's<0.001). Compared to participants who reported no regular exercise,  
212 CRP was significantly lower in those who reported 500-1000 and >1000 MMW (P's <0.01),  
213 with a trend for lower CRP in those who reported <500 MMW of regular exercise (P=0.078).



1  
2  
3 214 **sICAM-1 (Figure 1, Panel B).** We found a significant interaction between BMI and  
4  
5 215 MMW for sICAM-1 concentration ( $F=2.701$ ,  $P=0.013$ ). Levels of sICAM-1 were significantly  
6  
7 216 lower in obese subjects who reported  $>1000$  MMW compared to obese subjects who reported no  
8  
9 217 regular exercise ( $P=0.014$ ) and  $<500$  MMW ( $P=0.026$ ) and tended to be lower than levels in  
10  
11 218 obese subjects who reported 500-1000 MMW ( $P=0.079$ ). No differences in sICAM-1 by MMW  
12  
13 219 were observed among normal weight or overweight individuals.  
14  
15

16  
17 220 We also observed a main effect of BMI ( $F=6.060$ ,  $P=0.002$ ), such that sICAM-1 levels in  
18  
19 221 obese participants were significantly higher than levels found in both normal weight and  
20  
21 222 overweight participants ( $P's<0.01$ ). No significant main effect of MMW was found for sICAM-1  
22  
23 223 ( $F=0.931$ ,  $P=0.425$ ).  
24  
25

26  
27 224 **IL-6 (Figure 1, Panel C).** Both BMI and MMW had independent effects on circulating  
28  
29 225 concentrations of IL-6 (BMI:  $F=60.150$ ,  $P<0.001$ , MMW:  $F=10.680$ ,  $P<0.001$ ), with no  
30  
31 226 significant interaction ( $F=1.21$ ,  $P=0.297$ ). We found a dose-dependent effect of BMI, such that  
32  
33 227 higher BMI levels were associated with significantly greater IL-6 ( $P's<0.001$ ). Independent of  
34  
35 228 BMI, IL-6 was significantly lower in subjects who reported regular exercise ( $<500$  MMW, 500-  
36  
37 229 1000 MMW and  $>1000$  MMW) compared to those who reported no regular exercise ( $P's <0.01$ )  
38  
39 230 with no difference between levels of MMW.  
40  
41  
42

43 231 **Fibrinogen (Figure 1, Panel D).** BMI significantly contributed to circulating levels of  
44  
45 232 fibrinogen ( $F=42.385$ ,  $P<0.001$ ), such that dose-dependent increases were observed for all BMI  
46  
47 233 levels ( $P's<0.01$ ). While we observed a trend for lower fibrinogen with regular physical activity,  
48  
49 234 similar to that of IL-6, the effect did not reach statistical significance ( $F=2.187$ ,  $P=0.088$ ). We  
50  
51 235 observed no significant interaction between BMI and MMW for fibrinogen ( $F=1.680$ ,  $P=0.122$ ).  
52  
53  
54  
55  
56  
57  
58  
59  
60

1  
2  
3 236 **sE-Selectin ( 1, Panel E).** BMI significantly contributed to circulating levels of sE-  
4  
5  
6 237 selectin (F=28.253, P<0.001) with no significant contribution by MMW (F=0.207, P=0.892).  
7  
8 238 Dose-dependent increases in sE-selectin were also observed across BMI levels (P's<0.01). We  
9  
10 239 observed no significant interaction between BMI and MMW for sE-selectin (F=0.570, P=0.755).

11  
12  
13 240 **IL-6sr (Figure 1, Panel F).** No significant main effects for BMI (F=1.783, P=0.169),  
14  
15 241 MMW (F=1.434, P=0.231) or their interaction (F=0.834, P=0.544) were detected for IL-6sr.

16  
17 242 **Waist Circumference (WC) and Inflammatory Markers (Supplemental Figure 1).** A  
18  
19  
20 243 secondary analysis was completed using WC and MMW as independent variables and the  
21  
22 244 complete results of these analyses are located in the supplemental information. Briefly, we  
23  
24 245 found a significant interaction between WC and MMW on sICAM-1. In individuals with an at-  
25  
26 246 risk WC ( $\geq 102.0$  cm for men and  $\geq 88.0$  cm for women), sICAM-1 was significantly lower in  
27  
28 247 those reporting 1000+ MMW compared to less than 500 MMW and tended to be lower in those  
29  
30 248 reporting no regular exercise. Overall, main effects were similar to those found for BMI and  
31  
32 249 MMW analyses. Having an at-risk WC was independently related to higher levels of CRP,  
33  
34 250 sICAM-1, IL-6, fibrinogen and sE-selectin. Independent of WC, any level of regular exercise  
35  
36 251 was related to lower levels of CRP, IL-6 with a similar tendency for fibrinogen.

37  
38  
39  
40  
41 252

## 42 43 253 **DISCUSSION**

44  
45 254 The current study aimed to determine whether the impact of BMI and MMW on  
46  
47 255 inflammatory markers varied by level of overweight or obesity. For CRP and s-ICAM-1  
48  
49 256 regular physical activity appeared to diminish the effects of higher BMI compared to those who  
50  
51 257 reported no regular physical activity. In addition, we found that BMI was strongly and  
52  
53 258 independently related to greater concentrations of both established and emerging inflammatory  
54  
55  
56  
57  
58  
59  
60

1  
2  
3 259 markers that may increase CVD risk. Independent of BMI, regular physical activity was also  
4  
5 260 associated with lower IL-6, with a similar trend for fibrinogen. These results suggest that,  
6  
7  
8 261 although obesity has a clear impact on inflammation, physical activity appears to mitigate at least  
9  
10 262 some of this effect.

11  
12  
13 263 For example, overweight individuals had CRP levels that were similar to levels observed  
14  
15 264 in obese individuals if they reported no regular exercise (4.05 and 4.83  $\mu\text{g/mL}$ , respectively).  
16  
17  
18 265 CRP levels greater than 3  $\mu\text{g/mL}$  are typically associated with high CVD risk(26). In overweight  
19  
20 266 subjects who reported regular physical activity of at least 3, 20-minute sessions per week (be it  
21  
22 267 below [ $<500$ ], within [ $500-1000$ ] or above [ $>1000$ ] USDHHS MMW recommendations), CRP  
23  
24  
25 268 levels were lower and not significantly different from CRP levels found in normal weight  
26  
27 269 participants (). This suggests that increasing physical activity level to a minimum of 3 days per  
28  
29  
30 270 week, at least 20 minutes per day, may improve CRP profiles among overweight individuals.

31  
32 271 Obese individuals may require a higher level of regular physical activity in order to lower  
33  
34 272 inflammatory markers. While obese subjects also had greater levels of CRP and sICAM-1  
35  
36  
37 273 compared to lean and overweight subjects, those who reported  $>1000$  MMW (above the  
38  
39 274 USDHHS recommendation) had lower levels of sICAM-1 and tended to have lower CRP than  
40  
41 275 obese subjects reporting no regular physical activity. Taken together, we may speculate that  
42  
43  
44 276 while physical activity levels currently recommended for the general population may reduce  
45  
46 277 particular inflammatory makers in overweight populations, obese populations may require  
47  
48  
49 278 greater levels of physical activity above recommended values to reduce inflammatory markers  
50  
51 279 like CRP and sICAM-1.

52  
53 280 As expected, strong main effects of BMI were observed for CRP, IL-6, fibrinogen,  
54  
55  
56 281 sICAM-1 and sE-selectin, in agreement with previous work (27-30). Independent of BMI effects,  
57  
58  
59  
60

1  
2  
3 282 our results suggest that physical activity has differentiating effects on inflammatory markers.  
4  
5  
6 283 Individuals reporting no regular physical activity had higher levels of IL-6 with a tendency for  
7  
8 284 higher fibrinogen, compared to those reporting any level of regular physical activity (<500, 500-  
9  
10 285 1000 or >1000 MMW). Similar results have been observed in the MONItoring trends and  
11  
12 286 determinants in Cardiovascular disease (MONICA) study(31), the National Health and Nutrition  
13  
14 287 Examination Survey (NHANES III)(12, 14) and the Multi-Ethnic Study of Atherosclerosis  
15  
16 288 (MESA)(32), such that both increased frequency and intensity of physical activity have been  
17  
18 289 related to lower IL-6 and fibrinogen. Our findings add to these prior results by standardizing  
19  
20 290 levels of physical activity by using USDHHS. Our results suggest that, regular physical activity  
21  
22 291 at any level (<500, 500-1000, >1000) appears to be associated with lower levels of IL-6 and  
23  
24 292 possibly fibrinogen, independent of BMI.  
25  
26  
27  
28

29 293 Although IL-6 produced in hypertrophied adipose tissue(33, 34) initiates the acute phase  
30  
31 294 response, marked by the release of hepatic CRP (35, 36), an interaction between BMI and  
32  
33 295 physical activity was detected for CRP, but not IL-6. While IL-6 and CRP were significantly  
34  
35 296 correlated ( $r=0.514$ , see Supplemental Table 1), this correlation suggests that IL-6 levels do not  
36  
37 297 fully explain CRP levels at any given moment. Further, CRP is a more stable biomarker, owing  
38  
39 298 to its substantially longer plasma half-life (37), which may improve our ability to detect  
40  
41 299 interaction effects in CRP compared to IL-6.  
42  
43  
44

45 300 Interestingly, our results also suggest that regular exercise may have a more profound  
46  
47 301 impact on lowering classical markers of inflammation and less impact on the inflammatory status  
48  
49 302 of the endothelium. Regular physical activity has reliably been associated with lower levels of  
50  
51 303 IL-6 and CRP, both classical inflammatory markers related to adipose and systemic  
52  
53 304 inflammation(38). However, regular exercise appeared to have no independent impact on  
54  
55  
56  
57  
58  
59  
60

1  
2  
3 305 markers of endothelial activation, particularly sE-selectin. Higher levels of exercise were related  
4  
5 306 to lower sICAM-1 in obese individuals only. In one prior study, inverse relationships between  
6  
7  
8 307 physical activity and sICAM-1 and sE-selectin were reported in drug-treated hypertensive men  
9  
10 308 (39). Thus, further research is necessary to understand mechanisms underlying differential  
11  
12 309 associations of exercise with systemic and endothelial inflammation.

13  
14  
15 310 Several limitations must be addressed. First, the cross-sectional design does not allow us  
16  
17 311 to infer causal relationships. Prospective and interventional designs are necessary to confirm our  
18  
19 312 findings. No objective measures of physical activity were available in the MIDUS sample.  
20  
21 313 Therefore, the use of self-report physical activity data may have diminished our ability to detect  
22  
23 314 effects. However, in addition to being in line with previous studies using self-report physical  
24  
25 315 activity, our findings are also in line with previous studies(40, 41) that demonstrated that higher  
26  
27 316 cardiorespiratory fitness, as measured by indirect calorimetry, was associated with lower levels  
28  
29 317 of inflammation independent of visceral adiposity or BMI. Another limitation is that the sample  
30  
31 318 was predominantly comprised of non-Hispanic white individuals, suggesting that findings may  
32  
33 319 not extend to all ethnicities. Finally, BMI and physical activity variables are correlated,  
34  
35 320 potentially raising the concern of small sample sizes in specific groups crossed by BMI and  
36  
37 321 MMW. However, the smallest group for analyses still contained 54 individuals (normal weight  
38  
39 322 individuals reporting no exercise).

40  
41 323 In summary, our results demonstrate both interactive and independent influences of BMI  
42  
43 324 and levels of physical activity on both established and emerging markers of inflammation.  
44  
45 325 Inflammation is both a consequence of obesity and a mechanism promoting CVD. Regular  
46  
47 326 physical activity appears to mitigate the effects of higher BMI on some inflammatory markers,  
48  
49 327 particularly CRP, which is strongly implicated in CVD. Importantly, while any level of regular  
50  
51  
52  
53  
54  
55  
56  
57  
58  
59  
60

1  
2  
3 328 physical activity may help reduce inflammation in overweight individuals, similar effects in  
4  
5  
6 329 obese individuals may require levels of physical activity that are greater than currently  
7  
8 330 recommended by the USDHHS for general health.  
9

10 331

11  
12 332

13  
14 333

15  
16 334

17  
18 335

19  
20 336

21  
22 337

23  
24 338

25  
26 339

27  
28 340

29  
30 341

31  
32 342

33  
34 343

35  
36 344

37  
38 345

39  
40 346

41  
42 347

43  
44 348

45  
46 349

47  
48 350

49  
50  
51  
52  
53  
54  
55  
56  
57  
58  
59  
60

1  
2  
3 351 **ACKNOWLEDGEMENTS**  
4

5 352 We thank the staff of the Clinical Research Centers at the University of Wisconsin-Madison,  
6  
7  
8 353 UCLA, and Georgetown University for their effort in conducting the original data collection.  
9

10 354

11  
12  
13 355 **FUNDING**  
14

15 356 KS was supported through a T32 Training Fellowship (Training in Behavioral and Preventive  
16  
17 357 Medicine; T32 HL076134). The original research was supported by a grant from the National  
18  
19  
20 358 Institute on Aging (P01-AG020166) to conduct a longitudinal follow-up of the MIDUS (Midlife  
21  
22 359 in the U.S.) Investigation.  
23

24 360

25  
26  
27 361 The original study was supported by the John D. and Catherine T. MacArther Foundation  
28  
29 362 Research Network on Successful Midlife Development and by the following grants: M01-  
30  
31 363 RR023942 (Georgetown), M01-RR00865 (UCLA) from the General Clinical Research Centers  
32  
33 364 Program and 1UL1RR025011 (UW) from the Clinical and Translational Science Award (CTSA)  
34  
35 365 program of the National Center for Research Resources, National Institutes of Health.  
36  
37  
38

39 366

40  
41 367 **CONFLICTS OF INTEREST**  
42

43 368 The authors declare no conflict of interest.  
44  
45

46 369

47  
48 370 **CONTRIBUTORSHIP**  
49

50 371 KS, JMM and RRW each made substantial contributions to the conception and design of the  
51  
52 372 study, data acquisition, analysis and interpretation, as well as to drafting and revision for  
53  
54 373 substantial intellectual content. All authors made final approval of the version to be published.  
55  
56  
57  
58  
59  
60

1  
2  
3 374 **DATA SHARING STATEMENT**  
4

5 375 Data and documentation for MIDUS studies are available at the Inter-university Consortium for  
6  
7  
8 376 Political and Social Research (ICPSR). <http://www.icpsr.umich.edu/icpsrweb/landing.jsp>  
9

10 377

11  
12 378

13 **ARTICLE SUMMARY**

14 **Article focus**

- 15 379
- 16 • Systemic inflammation is related to the progression of  
17 cardiovascular disease.
  - 18 380 • Independent of obesity, physical activity is inversely related to  
19 concentrations of well-established inflammatory biomarkers,  
20 381 such as C-reactive protein (CRP) or interleukin-6 (IL-6).
  - 21 382 • This article evaluates interactive effects of body mass index and  
22 physical activity on established inflammatory markers, CRP,  
23 383 IL-6, and emerging inflammatory markers, fibrinogen, soluble  
24 intracellular adhesion molecule (sICAM)-1, soluble E-selectin,  
25 384 and IL-6 soluble receptor.

26  
27  
28  
29 385 **Key messages**

- 30 • Interactive effects of body mass index and physical activity  
31 were observed for CRP, such that regular physical activity  
32 386 reported by overweight individuals was related to significantly  
33 lower CRP levels compared to those reported no regular  
34 387 activity.
- 35 • Independent of BMI, regular physical activity was related to  
36 388 lower IL-6, with a trend for lower fibrinogen
- 37 • Physical activity had no independent effect on circulating  
38 389 markers related to endothelial inflammation, such as sICAM-1  
39 or sE-selectin.  
40 390

41  
42  
43 391 **Strengths and limitations**

- 44 • 1254 adults from the National Survey of Midlife Development  
45 in the United States (MIDUS) Biomarker Project were  
46 392 analyzed. Statistical analyses were adjusted for age, sex,  
47 smoking, and relevant medication use. A strength of this paper  
48 393 is categorizing physical activity levels based on national  
49 recommendations. This data may be used to determine  
50 394 appropriate levels of physical activity necessary for reducing  
51 inflammation in overweight and obese adults. However, cross-  
52 395 sectional data is limited, as causal inferences cannot be  
53 obtained. A second limitation is that the sample was  
54 396 predominantly comprised of non-Hispanic white individuals,  
55 therefore findings may not extend to all ethnicities.  
56  
57  
58  
59  
60



397 **REFERENCES**

- 398 1. Blair SN, Brodney S. Effects of physical inactivity and obesity on morbidity and  
399 mortality: current evidence and research issues. *Med Sci Sports Exerc.* 1999;31(11 Suppl):S646-  
400 62. Epub 1999/12/11.
- 401 2. Hotamisligil GS. Inflammation and metabolic disorders. *Nature.* 2006;444(7121):860-7.  
402 Epub 2006/12/15.
- 403 3. Koenig W, Khuseyinova N, Baumert J, et al. Increased concentrations of C-reactive  
404 protein and IL-6 but not IL-18 are independently associated with incident coronary events in  
405 middle-aged men and women: results from the MONICA/KORA Augsburg case-cohort study,  
406 1984-2002. *Arterioscler Thromb Vasc Biol.* 2006;26(12):2745-51. Epub 2006/09/30.
- 407 4. Papageorgiou N, Tousoulis D, Siasos G, et al. Is fibrinogen a marker of inflammation in  
408 coronary artery disease? *Hellenic J Cardiol.* 2010;51(1):1-9. Epub 2010/02/02.
- 409 5. Schmidt C, Hulthe J, Fagerberg B. Baseline ICAM-1 and VCAM-1 are increased in  
410 initially healthy middle-aged men who develop cardiovascular disease during 6.6 years of  
411 follow-up. *Angiology.* 2009;60(1):108-14. Epub 2008/05/28.
- 412 6. Demerath E, Towne B, Blangero J, et al. The relationship of soluble ICAM-1, VCAM-1,  
413 P-selectin and E-selectin to cardiovascular disease risk factors in healthy men and women. *Ann*  
414 *Hum Biol.* 2001;28(6):664-78. Epub 2001/12/01.
- 415 7. Rocha VZ, Libby P. Obesity, inflammation, and atherosclerosis. *Nat Rev Cardiol.*  
416 2009;6(6):399-409. Epub 2009/04/29.
- 417 8. Calabro P, Yeh ET. Obesity, inflammation, and vascular disease: the role of the adipose  
418 tissue as an endocrine organ. *Subcell Biochem.* 2007;42:63-91. Epub 2007/07/07.

- 1  
2  
3 419 9. Pou KM, Massaro JM, Hoffmann U, et al. Visceral and subcutaneous adipose tissue  
4  
5 420 volumes are cross-sectionally related to markers of inflammation and oxidative stress: the  
6  
7 421 Framingham Heart Study. *Circulation*. 2007;116(11):1234-41. Epub 2007/08/22.
- 8  
9  
10 422 10. Mathieu P, Poirier P, Pibarot P, et al. Visceral obesity: the link among inflammation,  
11  
12 423 hypertension, and cardiovascular disease. *Hypertension*. 2009;53(4):577-84. Epub 2009/02/25.
- 13  
14  
15 424 11. Reuben DB, Judd-Hamilton L, Harris TB, et al. The associations between physical  
16  
17 425 activity and inflammatory markers in high-functioning older persons: MacArthur Studies of  
18  
19 426 Successful Aging. *J Am Geriatr Soc*. 2003;51(8):1125-30. Epub 2003/08/02.
- 20  
21  
22 427 12. King DE, Carek P, Mainous AG, 3rd, et al. Inflammatory markers and exercise:  
23  
24 428 differences related to exercise type. *Med Sci Sports Exerc*. 2003;35(4):575-81. Epub 2003/04/04.
- 25  
26  
27 429 13. Wannamethee SG, Lowe GD, Whincup PH, et al. Physical activity and hemostatic and  
28  
29 430 inflammatory variables in elderly men. *Circulation*. 2002;105(15):1785-90. Epub 2002/04/17.
- 30  
31  
32 431 14. Abramson JL, Vaccarino V. Relationship between physical activity and inflammation  
33  
34 432 among apparently healthy middle-aged and older US adults. *Arch Intern Med*.  
35  
36 433 2002;162(11):1286-92. Epub 2002/06/01.
- 37  
38  
39 434 15. Geffken DF, Cushman M, Burke GL, et al. Association between physical activity and  
40  
41 435 markers of inflammation in a healthy elderly population. *Am J Epidemiol*. 2001;153(3):242-50.  
42  
43 436 Epub 2001/02/07.
- 44  
45  
46 437 16. Taaffe DR, Harris TB, Ferrucci L, et al. Cross-sectional and prospective relationships of  
47  
48 438 interleukin-6 and C-reactive protein with physical performance in elderly persons: MacArthur  
49  
50 439 studies of successful aging. *J Gerontol A Biol Sci Med Sci*. 2000;55(12):M709-15. Epub  
51  
52 440 2000/12/29.
- 53  
54  
55  
56  
57  
58  
59  
60

- 1  
2  
3 441 17. Starkie R, Ostrowski SR, Jauffred S, et al. Exercise and IL-6 infusion inhibit endotoxin-  
4  
5 442 induced TNF-alpha production in humans. FASEB J. 2003;17(8):884-6. Epub 2003/03/11.  
6  
7  
8 443 18. Pedersen BK, Steensberg A, Fischer C, et al. Exercise and cytokines with particular focus  
9  
10 444 on muscle-derived IL-6. Exerc Immunol Rev. 2001;7:18-31. Epub 2001/10/03.  
11  
12  
13 445 19. Pedersen BK, Steensberg A, Fischer C, et al. The metabolic role of IL-6 produced during  
14  
15 446 exercise: is IL-6 an exercise factor? Proc Nutr Soc. 2004;63(2):263-7. Epub 2004/08/06.  
16  
17  
18 447 20. Trayhurn P, Wood IS. Adipokines: inflammation and the pleiotropic role of white  
19  
20 448 adipose tissue. Br J Nutr. 2004;92(3):347-55. Epub 2004/10/08.  
21  
22  
23 449 21. Beavers KM, Brinkley TE, Nicklas BJ. Effect of exercise training on chronic  
24  
25 450 inflammation. Clin Chim Acta. 2010;411(11-12):785-93. Epub 2010/03/02.  
26  
27  
28 451 22. USDHHS, editor. 2008 Physical Activity Guidelines for Americans. Washington  
29  
30 452 DC2008.  
31  
32 453 23. C Ryff DA, JS Ayanian, DS carr, PD Cleary, C Coe, R Davidson, RF Krueger, ME  
33  
34 454 Lachman, NF Marks, DK Mroczek, T Seeman, MM Seltzer, BH Singer, RP Sloan, PA Tun, M  
35  
36 455 Weinstein, D Williams. National Survey of Midlife Development in the United State (MIDUS II),  
37  
38 456 2004-2006. Inter-university Consortium for Political and Social Research (ICPSR) [distrubutor].  
39  
40  
41 457 2011.  
42  
43  
44 458 24. Kraemer H. How Many Subjects? Statistical Power Analysis in Research: SAGE  
45  
46 459 Publications, Inc; 1987.  
47  
48  
49 460 25. Cohen J. Statistical Power Analysis for the Behavioral Sciences. Second ed: Lawrence  
50  
51 461 Erlbaum Associates; 1998.  
52  
53  
54 462 26. Bassuk SS, Rifai N, Ridker PM. High-sensitivity C-reactive protein: clinical importance.  
55  
56 463 Curr Probl Cardiol. 2004;29(8):439-93. Epub 2004/07/20.  
57  
58  
59  
60

- 1  
2  
3 464 27. Park HS, Park JY, Yu R. Relationship of obesity and visceral adiposity with serum  
4  
5 465 concentrations of CRP, TNF-alpha and IL-6. *Diabetes Res Clin Pract.* 2005;69(1):29-35. Epub  
6  
7 466 2005/06/16.
- 8  
9  
10 467 28. Bastard JP, Jardel C, Bruckert E, et al. Elevated levels of interleukin 6 are reduced in  
11  
12 468 serum and subcutaneous adipose tissue of obese women after weight loss. *J Clin Endocrinol*  
13  
14 469 *Metab.* 2000;85(9):3338-42. Epub 2000/09/22.
- 15  
16  
17 470 29. Ditschuneit HH, Flechtner-Mors M, Adler G. Fibrinogen in obesity before and after  
18  
19 471 weight reduction. *Obes Res.* 1995;3(1):43-8. Epub 1995/01/01.
- 20  
21  
22 472 30. Straczkowski M, Lewczuk P, Dzienis-Straczkowska S, et al. Elevated soluble  
23  
24 473 intercellular adhesion molecule-1 levels in obesity: relationship to insulin resistance and tumor  
25  
26 474 necrosis factor-alpha system activity. *Metabolism.* 2002;51(1):75-8. Epub 2002/01/10.
- 27  
28  
29 475 31. Autenrieth C, Schneider A, Doring A, et al. Association between different domains of  
30  
31 476 physical activity and markers of inflammation. *Med Sci Sports Exerc.* 2009;41(9):1706-13. Epub  
32  
33 477 2009/08/07.
- 34  
35  
36 478 32. Majka DS, Chang RW, Vu TH, et al. Physical activity and high-sensitivity C-reactive  
37  
38 479 protein: the multi-ethnic study of atherosclerosis. *Am J Prev Med.* 2009;36(1):56-62. Epub  
39  
40 480 2008/11/18.
- 41  
42  
43 481 33. Day CP. From fat to inflammation. *Gastroenterology.* 2006;130(1):207-10. Epub  
44  
45 482 2006/01/13.
- 46  
47  
48 483 34. Fain JN, Madan AK, Hiler ML, et al. Comparison of the release of adipokines by adipose  
49  
50 484 tissue, adipose tissue matrix, and adipocytes from visceral and subcutaneous abdominal adipose  
51  
52 485 tissues of obese humans. *Endocrinology.* 2004;145(5):2273-82. Epub 2004/01/17.
- 53  
54  
55  
56  
57  
58  
59  
60

- 1  
2  
3 486 35. Castell JV, Gomez-Lechon MJ, David M, et al. Interleukin-6 is the major regulator of  
4  
5 487 acute phase protein synthesis in adult human hepatocytes. *FEBS Lett.* 1989;242(2):237-9. Epub  
6  
7 488 1989/01/02.  
8  
9  
10 489 36. Heinrich PC, Castell JV, Andus T. Interleukin-6 and the acute phase response. *Biochem J.*  
11  
12 490 1990;265(3):621-36. Epub 1990/02/01.  
13  
14  
15 491 37. Pradhan AD, Manson JE, Rifai N, et al. C-reactive protein, interleukin 6, and risk of  
16  
17 492 developing type 2 diabetes mellitus. *JAMA.* 2001;286(3):327-34. Epub 2001/07/24.  
18  
19  
20 493 38. Mathieu P, Lemieux I, Despres JP. Obesity, inflammation, and cardiovascular risk. *Clin*  
21  
22 494 *Pharmacol Ther.* 2010;87(4):407-16. Epub 2010/03/05.  
23  
24  
25 495 39. Hjelstuen A, Anderssen SA, Holme I, et al. Markers of inflammation are inversely related  
26  
27 496 to physical activity and fitness in sedentary men with treated hypertension. *Am J Hypertens.*  
28  
29 497 2006;19(7):669-75; discussion 76-7. Epub 2006/07/04.  
30  
31  
32 498 40. Church TS, Barlow CE, Earnest CP, et al. Associations between cardiorespiratory fitness  
33  
34 499 and C-reactive protein in men. *Arterioscler Thromb Vasc Biol.* 2002;22(11):1869-76. Epub  
35  
36 500 2002/11/12.  
37  
38  
39 501 41. Arsenault BJ, Cartier A, Cote M, et al. Body composition, cardiorespiratory fitness, and  
40  
41 502 low-grade inflammation in middle-aged men and women. *Am J Cardiol.* 2009;104(2):240-6.  
42  
43 503 Epub 2009/07/07.  
44  
45  
46 504  
47  
48 505  
49  
50 506  
51  
52  
53 507  
54  
55 508  
56  
57  
58  
59  
60

1  
2  
3 509 **FIGURE AND TABLE LEGENDS**  
4  
5

6 510  
7

8 511  
9

10 512 **Figure 1: Inflammatory Markers.** Data from 1254 men and women in MIDUS. Joint  
11  
12 513 association of BMI category (normal, overweight and obese) and MMW category (no regular  
13  
14 514 exercise, <500 MMW, 500-1000 MMW and >1000 MMW) for CRP (A), sICAM-1 (B), IL-6 (C),  
15  
16 515 fibrinogen (D), sE-Selectin (E) and IL-6sr (F). These analyses were adjusted for age, sex,  
17  
18 516 smoking and relevant medication use. The analysis for sICAM-1 was further adjusted for race.  
19  
20 517 Error bars represent SEM. BMI=BMI main effect P value, MMW=MMW main effect P value,  
21  
22 518 INT=interaction effect P value.  
23  
24  
25  
26

27 519  
28

29 520  
30

31 521 **Table 1: Subject Characteristics.** BMI = body mass index; CRP = C-reactive protein; IL =  
32  
33 522 interleukin; IL-6sr = IL-6 soluble receptor; MMW = MET-Minutes per Week; sE-Selectin =  
34  
35 523 soluble E-Selectin; sICAM-1= soluble intracellular adhesion molecule-1.  
36  
37  
38

39 524  
40  
41  
42  
43  
44  
45  
46  
47  
48  
49  
50  
51  
52  
53  
54  
55  
56  
57  
58  
59  
60

**STROBE 2007 (v4) checklist of items to be included in reports of observational studies in epidemiology\***  
**Checklist for cohort, case-control, and cross-sectional studies (combined)**

| Section/Topic             | Item # | Recommendation                                                                                                                                                                                                                                                                                                                                                                                                                                                         | Reported on page # |
|---------------------------|--------|------------------------------------------------------------------------------------------------------------------------------------------------------------------------------------------------------------------------------------------------------------------------------------------------------------------------------------------------------------------------------------------------------------------------------------------------------------------------|--------------------|
| Title and abstract        | 1      | (a) Indicate the study’s design with a commonly used term in the title or the abstract                                                                                                                                                                                                                                                                                                                                                                                 | 1                  |
|                           |        | (b) Provide in the abstract an informative and balanced summary of what was done and what was found                                                                                                                                                                                                                                                                                                                                                                    | 2                  |
| <b>Introduction</b>       |        |                                                                                                                                                                                                                                                                                                                                                                                                                                                                        |                    |
| Background/rationale      | 2      | Explain the scientific background and rationale for the investigation being reported                                                                                                                                                                                                                                                                                                                                                                                   | 3                  |
| Objectives                | 3      | State specific objectives, including any pre-specified hypotheses                                                                                                                                                                                                                                                                                                                                                                                                      | 3                  |
| <b>Methods</b>            |        |                                                                                                                                                                                                                                                                                                                                                                                                                                                                        |                    |
| Study design              | 4      | Present key elements of study design early in the paper                                                                                                                                                                                                                                                                                                                                                                                                                | 4                  |
| Setting                   | 5      | Describe the setting, locations, and relevant dates, including periods of recruitment, exposure, follow-up, and data collection                                                                                                                                                                                                                                                                                                                                        | 4                  |
| Participants              | 6      | (a) <i>Cohort study</i> —Give the eligibility criteria, and the sources and methods of selection of participants. Describe methods of follow-up<br><i>Case-control study</i> —Give the eligibility criteria, and the sources and methods of case ascertainment and control selection. Give the rationale for the choice of cases and controls<br><i>Cross-sectional study</i> —Give the eligibility criteria, and the sources and methods of selection of participants | 4                  |
|                           |        | (b) <i>Cohort study</i> —For matched studies, give matching criteria and number of exposed and unexposed<br><i>Case-control study</i> —For matched studies, give matching criteria and the number of controls per case                                                                                                                                                                                                                                                 | N/A                |
| Variables                 | 7      | Clearly define all outcomes, exposures, predictors, potential confounders, and effect modifiers. Give diagnostic criteria, if applicable                                                                                                                                                                                                                                                                                                                               | 4-7                |
| Data sources/ measurement | 8*     | For each variable of interest, give sources of data and details of methods of assessment (measurement). Describe comparability of assessment methods if there is more than one group                                                                                                                                                                                                                                                                                   | 4-7                |
| Bias                      | 9      | Describe any efforts to address potential sources of bias                                                                                                                                                                                                                                                                                                                                                                                                              | 7                  |
| Study size                | 10     | Explain how the study size was arrived at                                                                                                                                                                                                                                                                                                                                                                                                                              | 4                  |
| Quantitative variables    | 11     | Explain how quantitative variables were handled in the analyses. If applicable, describe which groupings were chosen and why                                                                                                                                                                                                                                                                                                                                           | 4-7                |
| Statistical methods       | 12     | (a) Describe all statistical methods, including those used to control for confounding                                                                                                                                                                                                                                                                                                                                                                                  | 7                  |
|                           |        | (b) Describe any methods used to examine subgroups and interactions                                                                                                                                                                                                                                                                                                                                                                                                    | 7                  |
|                           |        | (c) Explain how missing data were addressed                                                                                                                                                                                                                                                                                                                                                                                                                            | 7                  |
|                           |        | (d) <i>Cohort study</i> —If applicable, explain how loss to follow-up was addressed<br><i>Case-control study</i> —If applicable, explain how matching of cases and controls was addressed                                                                                                                                                                                                                                                                              | N/A                |

|                          |     |                                                                                                                                                                                                              |      |
|--------------------------|-----|--------------------------------------------------------------------------------------------------------------------------------------------------------------------------------------------------------------|------|
|                          |     | <i>Cross-sectional study</i> —If applicable, describe analytical methods taking account of sampling strategy                                                                                                 |      |
|                          |     | (e) Describe any sensitivity analyses                                                                                                                                                                        | N/A  |
| <b>Results</b>           |     |                                                                                                                                                                                                              |      |
| Participants             | 13* | (a) Report numbers of individuals at each stage of study—eg numbers potentially eligible, examined for eligibility, confirmed eligible, included in the study, completing follow-up, and analysed            | 8    |
|                          |     | (b) Give reasons for non-participation at each stage                                                                                                                                                         | N/A  |
|                          |     | (c) Consider use of a flow diagram                                                                                                                                                                           | N/A  |
| Descriptive data         | 14* | (a) Give characteristics of study participants (eg demographic, clinical, social) and information on exposures and potential confounders                                                                     | 8    |
|                          |     | (b) Indicate number of participants with missing data for each variable of interest                                                                                                                          | 8    |
|                          |     | (c) <i>Cohort study</i> —Summarise follow-up time (eg, average and total amount)                                                                                                                             | N/A  |
| Outcome data             | 15* | <i>Cohort study</i> —Report numbers of outcome events or summary measures over time                                                                                                                          |      |
|                          |     | <i>Case-control study</i> —Report numbers in each exposure category, or summary measures of exposure                                                                                                         |      |
|                          |     | <i>Cross-sectional study</i> —Report numbers of outcome events or summary measures                                                                                                                           | 8-10 |
| Main results             | 16  | (a) Give unadjusted estimates and, if applicable, confounder-adjusted estimates and their precision (eg, 95% confidence interval). Make clear which confounders were adjusted for and why they were included | 8-10 |
|                          |     | (b) Report category boundaries when continuous variables were categorized                                                                                                                                    | 8-10 |
|                          |     | (c) If relevant, consider translating estimates of relative risk into absolute risk for a meaningful time period                                                                                             | N/A  |
| Other analyses           | 17  | Report other analyses done—eg analyses of subgroups and interactions, and sensitivity analyses                                                                                                               | N/A  |
| <b>Discussion</b>        |     |                                                                                                                                                                                                              |      |
| Key results              | 18  | Summarise key results with reference to study objectives                                                                                                                                                     | 10   |
| Limitations              | 19  | Discuss limitations of the study, taking into account sources of potential bias or imprecision. Discuss both direction and magnitude of any potential bias                                                   | 13   |
| Interpretation           | 20  | Give a cautious overall interpretation of results considering objectives, limitations, multiplicity of analyses, results from similar studies, and other relevant evidence                                   | 14   |
| Generalisability         | 21  | Discuss the generalisability (external validity) of the study results                                                                                                                                        | 14   |
| <b>Other information</b> |     |                                                                                                                                                                                                              |      |
| Funding                  | 22  | Give the source of funding and the role of the funders for the present study and, if applicable, for the original study on which the present article is based                                                | 15   |

\*Give information separately for cases and controls in case-control studies and, if applicable, for exposed and unexposed groups in cohort and cross-sectional studies.

**Note:** An Explanation and Elaboration article discusses each checklist item and gives methodological background and published examples of transparent reporting. The STROBE checklist is best used in conjunction with this article (freely available on the Web sites of PLoS Medicine at <http://www.plosmedicine.org/>, Annals of Internal Medicine at <http://www.annals.org/>, and Epidemiology at <http://www.epidem.com/>). Information on the STROBE Initiative is available at [www.strobe-statement.org](http://www.strobe-statement.org).



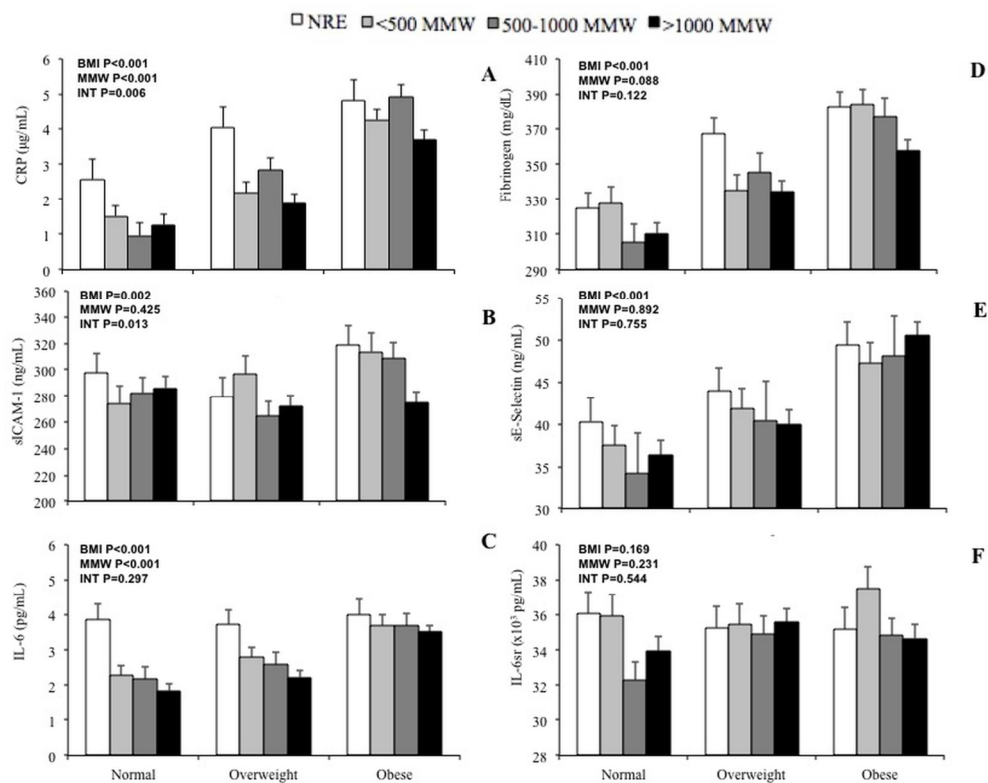

Figure 1: Inflammatory Markers. Data from 1255 men and women in MIDUS. Joint association of BMI category (normal, overweight and obese) and MMW category (no regular exercise, <500 MMW, 500-1000 MMW and >1000 MMW) for CRP (A), sICAM-1 (B), IL-6 (C), fibrinogen (D), sE-Selectin (E) and IL-6sr (F). These analyses were adjusted for age, sex, smoking and relevant medication use. Error bars represent SEM. BMI=BMI main effect P value, MMW=MMW main effect P value, INT=interaction effect P value. 114x90mm (300 x 300 DPI)

### **Waist Circumference (WC) and MET-Minutes per Week (MMW)**

*CRP (Supplementary Figure 1, panel A).* We found no significant interaction effect between WC and MMW for CRP ( $F=1.426$ ,  $P=0.234$ ). We found significant main effects for WC ( $F=159.669$ ,  $P<0.001$ ) and MMW ( $F=9.766$ ,  $P<0.001$ ) on circulating CRP. CRP levels were lower in participants who reported a normal waist circumference and any level of regular exercise (<500, 500-1000, and >1000 MMW), compared to those with an at-risk waist circumference ( $P's<0.001$ ) and those no regular exercise ( $P's<0.05$ ).

*sICAM-1 (Supplementary Figure 1, panel B).* We found a significant interaction effect between WC and MMW for sICAM-1 ( $F=4.846$ ,  $P=0.002$ ). While sICAM-1 levels were not significantly difference across MMW categories in individuals with a normal WC ( $P's>0.05$ ), in individuals with an at-risk WC, sICAM-1 was significantly lower in those reporting 1000+ MMW compared to less than 500 MMW ( $P=0.007$ ) and tended to be lower in those reporting no regular exercise ( $P=0.072$ ). Similar to BMI, waist circumference independently contributed to sICAM-1 ( $F=26.841$ ,  $P<0.001$ ), such that values were greater in subjects with an at-risk WC compared to those with a normal WC ( $P <0.001$ ). No effect of MMW was observed ( $F=1.055$ ,  $P=0.367$ ) for sICAM-1.

*IL-6 (Supplementary Figure 1, panel C).* We found no significant interaction effect between WC and MMW for IL-6 ( $F=1.282$ ,  $P=0.217$ ). We found significant main effects for waist circumference ( $F=84.441$ ,  $P<0.001$ ) and MMW ( $F=10.255$ ,  $P<0.001$ ), such that IL-6 levels were lower in participants who reported an normal waist circumference and any level of regular exercise (<500, 500-1000, and >1000 MMW), compared to those with an at risk waist circumference ( $P's<0.001$ ) and those reporting no regular exercise ( $P's<0.05$ ).

1  
2  
3  
4  
5  
6  
7  
8  
9  
10  
11  
12  
13  
14  
15  
16  
17  
18  
19  
20  
21  
22  
23  
24  
25  
26  
27  
28  
29  
30  
31  
32  
33  
34  
35  
36  
37  
38  
39  
40  
41  
42  
43  
44  
45  
46  
47  
48  
49  
50  
51  
52  
53  
54  
55  
56  
57  
58  
59  
60

*Fibrinogen (Supplementary Figure 1, panel D).* We found no significant interaction effect between WC and MMW for fibrinogen ( $F=2.019$ ,  $P=0.110$ ). Waist circumference also impacted fibrinogen ( $F=38.960$ ,  $P<0.001$ ), such that values were greater in subjects with an at-risk waist circumference compared to those with a normal waist circumference ( $P$ 's  $<0.001$ ). The effect of MMW on fibrinogen bordered on statistical significance ( $F=2.245$ ,  $P=0.081$ ), such that values were lower with in individuals who reported greater MMW.

*sE-Selectin (Supplementary Figure 1, panel E).* We found no significant interaction between WC and MMW for sE-Selectin ( $F=0.041$ ,  $P=0.989$ ). Waist circumference also independently contributed to sE-selectin ( $F=40.967$ ,  $P<0.001$ ), such that values were greater in subjects with an at-risk waist circumference compared to those with a normal waist circumference ( $P <0.001$ ). No effect of MMW was observed for sE-selectin ( $F=0.172$ ,  $P=0.916$ ).

*IL-6sr (Supplementary Figure 1, panel F).* We found no significant interaction effect between WC and MMW for IL-6sr ( $F=0.769$ ,  $P=0.511$ ). Like BMI, we found no main effects for waist circumference ( $F=3.505$ ,  $P=0.061$ ) or MMW on IL-6sr ( $F=1.158$ ,  $P=0.325$ ).

*Interrelationship of Inflammatory Markers.* Correlations between all inflammatory markers are shown in Supplementary Table 1.

## Figure Legend

### Supplemental Figure 1. Waist Circumference (WC), MET Minutes per Week (MMW)

**and Inflammatory Markers.** Data from 1255 men and women in MIDUS. Joint association of WC category (normal [ $\geq 102.0$  cm for men and  $\geq 88.0$  cm for women], at risk [ $> 102.0$  cm for men and  $> 88.0$  cm for women]) and MMW category (no regular exercise,  $< 500$  MMW, 500-1000 MMW and  $> 1000$  MMW) for CRP (A), sICAM-1 (B), IL-6 (C), fibrinogen (D), sE-Selectin (E) and IL-6sr (F). These analyses were adjusted for age, sex, smoking and relevant medication use. Error bars represent SEM. WC=WC main effect, MMW=MMW main effect, INT=interaction effect.

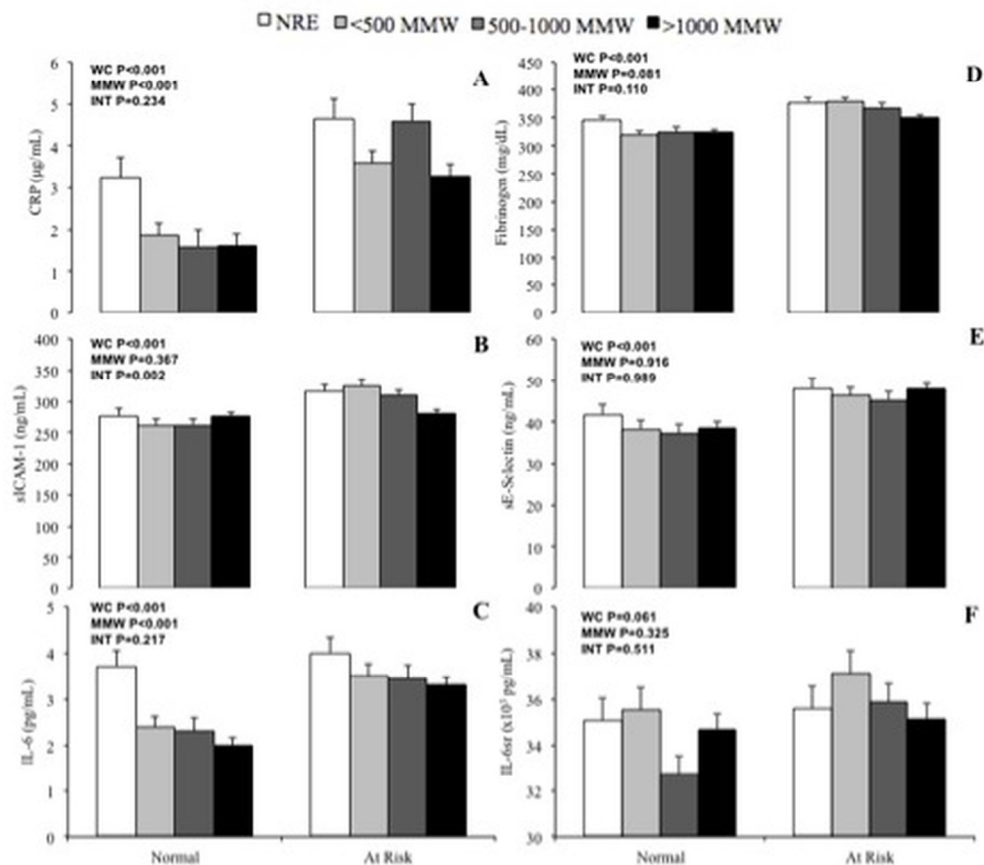

Supplemental Figure 1. Waist Circumference (WC), MET Minutes per Week (MMW) and Inflammatory Markers. Data from 1255 men and women in MIDUS. Joint association of WC category (normal [ $\geq 102.0$  cm for men and  $\geq 88.0$  cm for women], at risk [ $> 102.0$  cm for men and  $> 88.0$  cm for women]) and MMW category (no regular exercise,  $< 500$  MMW,  $500-1000$  MMW and  $> 1000$  MMW) for CRP (A), sICAM-1 (B), IL-6 (C), fibrinogen (D), sE-Selectin (E) and IL-6sr (F). These analyses were adjusted for age, sex, smoking and relevant medication use. Error bars represent SEM. WC=WC main effect, MMW=MMW main effect, INT=interaction effect.

100x90mm (300 x 300 DPI)

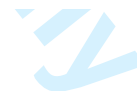

|             | IL-6    | IL-6sr  | Fibrinogen | CRP     | sE-Selectin |
|-------------|---------|---------|------------|---------|-------------|
| IL-6        |         |         |            |         |             |
| IL-6sr      | 0.037   |         |            |         |             |
| Fibrinogen  | 0.417** | 0.017   |            |         |             |
| CRP         | 0.514** | 0.053   | 0.513**    |         |             |
| sE-Selectin | 0.213** | 0.035   | 0.104**    | 0.156** |             |
| sICAM-1     | 0.134** | 0.140** | 0.092**    | 0.144** | 0.041       |

**Supplemental Table 1. Correlations of Inflammatory Biomarkers.** IL-6 = Interleukin-6, IL-6sr = IL-6 soluble receptor, CRP = C-reactive protein, sE-Selectin = soluble E-Selectin and sICAM-1 = soluble intracellular adhesion molecule - 1. \* denotes significance at  $p \leq 0.05$ , \*\* denotes significance at  $p \leq 0.001$ .
